# Supplementary material for: Life after COVID-19: the road from intensive care back to living – a prospective cohort study
Source: PubMed Central journal article supplement — BMJ Open. 2022 Nov 2;12(11):e062332. doi: 10.1136/bmjopen-2022-062332 (PMC9638746; doi:10.1136/bmjopen-2022-062332), 2022-11-02
Supplement: bmjopen-2022-062332.draft_revisions.pdf [file bmjopen-2022-062332.draft_revisions.pdf]

# BMJ Open

BMJ Open is committed to open peer review. As part of this commitment we make the peer review history of every article we publish publicly available.

When an article is published we post the peer reviewers' comments and the authors' responses online. We also post the versions of the paper that were used during peer review. These are the versions that the peer review comments apply to.

The versions of the paper that follow are the versions that were submitted during the peer review process. They are not the versions of record or the final published versions. They should not be cited or distributed as the published version of this manuscript.

BMJ Open is an open access journal and the full, final, typeset and author-corrected version of record of the manuscript is available on our site with no access controls, subscription charges or pay-per-view fees (<http://bmjopen.bmj.com>).

If you have any questions on BMJ Open's open peer review process please email [info.bmjopen@bmj.com](mailto:info.bmjopen@bmj.com)

# BMJ Open

## Life after COVID-19 the road from intensive care back to living: a prospective cohort study

|                               |                                                                                                                                                                                                                                                                                                                                                                                                                                                                                                                                                                                                                                                                                                                                                                                                                                                                                     |
|-------------------------------|-------------------------------------------------------------------------------------------------------------------------------------------------------------------------------------------------------------------------------------------------------------------------------------------------------------------------------------------------------------------------------------------------------------------------------------------------------------------------------------------------------------------------------------------------------------------------------------------------------------------------------------------------------------------------------------------------------------------------------------------------------------------------------------------------------------------------------------------------------------------------------------|
| Journal:                      | <i>BMJ Open</i>                                                                                                                                                                                                                                                                                                                                                                                                                                                                                                                                                                                                                                                                                                                                                                                                                                                                     |
| Manuscript ID                 | bmjopen-2022-062332                                                                                                                                                                                                                                                                                                                                                                                                                                                                                                                                                                                                                                                                                                                                                                                                                                                                 |
| Article Type:                 | Original research                                                                                                                                                                                                                                                                                                                                                                                                                                                                                                                                                                                                                                                                                                                                                                                                                                                                   |
| Date Submitted by the Author: | 02-Mar-2022                                                                                                                                                                                                                                                                                                                                                                                                                                                                                                                                                                                                                                                                                                                                                                                                                                                                         |
| Complete List of Authors:     | <p>Wiertz, Carolina; Adelante, Rehabilitation medicine; Maastricht University, Department of Rehabilitation Medicine Research School CAPHRI</p> <p>Hemmen, Bena; Adelante, Rehabilitation medicine; Maastricht University, Department of Rehabilitation Medicine Research School CAPHRI</p> <p>Sep, Simone JS; Adelante, Rehabilitation medicine; Maastricht University, Department of Rehabilitation Medicine Research School CAPHRI</p> <p>van Santen, Susanne; Maastricht Universitair Medisch Centrum+, Department of Intensive Care</p> <p>van Horn, Yvette; Adelante, Rehabilitation medicine</p> <p>van Kuijk, Sander; Maastricht Universitair Medisch Centrum+, Clinical Epidemiology and Medical Technology Assessment</p> <p>Verbunt, Jeanine; Adelante, Rehabilitation medicine; Maastricht University, Department of Rehabilitation Medicine Research School CAPHRI</p> |
| Keywords:                     | COVID-19, REHABILITATION MEDICINE, Adult intensive & critical care < INTENSIVE & CRITICAL CARE                                                                                                                                                                                                                                                                                                                                                                                                                                                                                                                                                                                                                                                                                                                                                                                      |
|                               |                                                                                                                                                                                                                                                                                                                                                                                                                                                                                                                                                                                                                                                                                                                                                                                                                                                                                     |

SCHOLARONE™  
Manuscripts

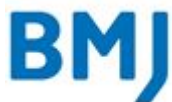

I, the Submitting Author has the right to grant and does grant on behalf of all authors of the Work (as defined in the below author licence), an exclusive licence and/or a non-exclusive licence for contributions from authors who are: i) UK Crown employees; ii) where BMJ has agreed a CC-BY licence shall apply, and/or iii) in accordance with the terms applicable for US Federal Government officers or employees acting as part of their official duties; on a worldwide, perpetual, irrevocable, royalty-free basis to BMJ Publishing Group Ltd ("BMJ") its licensees and where the relevant Journal is co-owned by BMJ to the co-owners of the Journal, to publish the Work in this journal and any other BMJ products and to exploit all rights, as set out in our [licence](#).

The Submitting Author accepts and understands that any supply made under these terms is made by BMJ to the Submitting Author unless you are acting as an employee on behalf of your employer or a postgraduate student of an affiliated institution which is paying any applicable article publishing charge ("APC") for Open Access articles. Where the Submitting Author wishes to make the Work available on an Open Access basis (and intends to pay the relevant APC), the terms of reuse of such Open Access shall be governed by a Creative Commons licence – details of these licences and which [Creative Commons](#) licence will apply to this Work are set out in our licence referred to above.

Other than as permitted in any relevant BMJ Author's Self Archiving Policies, I confirm this Work has not been accepted for publication elsewhere, is not being considered for publication elsewhere and does not duplicate material already published. I confirm all authors consent to publication of this Work and authorise the granting of this licence.

1  
2  
3 1 **Life after COVID-19 the road from intensive care back to living: a prospective cohort study**  
4  
5 2  
6  
7

8 3 **Author's names**

9  
10 4 Carolina MH Wiertz MD<sup>1,2</sup>, Bena Hemmen MD PhD<sup>1,2</sup>, Simone JS Sep PhD<sup>1,2</sup>, Susanne van Santen  
11 MD<sup>3</sup>, Yvette Y van Horn MD<sup>1</sup>, Sander MJ van Kuijk<sup>4</sup>, Jeanine A Verbunt MD PhD<sup>1,2</sup>  
12  
13  
14 6

15  
16 7 **Affiliation of authors**

17  
18 8 <sup>1</sup> Adelante Zorggroep, P.O. Box 88, 6430 AB Hoensbroek, The Netherlands.

19  
20 9 <sup>2</sup> Department of Rehabilitation Medicine Research School CAPHRI, Maastricht University, P.O.  
21 Box 616, 6200 MD Maastricht, The Netherlands.  
22  
23 10

24  
25 11 <sup>3</sup> Department of Intensive Care Medicine, Maastricht University Medical Centre, 6202 AZ  
26 Maastricht, The Netherlands.  
27  
28 12

29  
30 13 <sup>4</sup> Department of Clinical Epidemiology and Medical Technology Assessment, Maastricht  
31 University Medical Centre, 6202 AZ Maastricht, The Netherlands.  
32  
33  
34 15

35  
36 16 **Corresponding author: Carolina Wiertz**

37  
38 17 Adelante Zorggroep

39  
40 18 P.O. Box 88

41  
42 19 6430 AB Hoensbroek

43  
44 20 The Netherlands

45  
46 21 E-mail: c.wiertz@adelante-zorggroep.nl  
47  
48  
49  
50 22  
51  
52  
53  
54  
55  
56  
57  
58  
59  
60

1  
2  
3 **Life after COVID-19 the road from intensive care back to living: a prospective cohort study**  
4  
5

6 **Abstract**  
7  
8

9 **Objectives:** The principal aim of the present study was to evaluate recovery of participation in post-  
10 COVID-19 patients during the first year after ICU discharge. The secondary aim was to identify the early  
11 determinants associated with recovery of participation.  
12  
13  
14

15  
16 **Design:** Prospective cohort study.  
17  
18

19 **Setting:** Tertiary COVID-19 post-ICU inpatient rehabilitation facility in the Netherlands, during the first  
20 epidemic wave between April and July 2020, with a one-year follow-up.  
21  
22

23  
24 **Participants:** COVID-19 ICU survivors above 18 years of age needing inpatient rehabilitation.  
25  
26

27 **Main outcome measures:** Participation in society was periodically assessed by the 'Utrecht Scale for  
28 Evaluation of Rehabilitation-Participation (USER-P) restrictions scale'. Secondary measures of body  
29 function impairments (muscle force, pulmonary function, fatigue (MFI), breathlessness (MRC), pain  
30 (NRS)), activity limitations (6MWT, PROMIS 8b), personal factors (coping (UPCC), Anxiety and  
31 depression (HADS), post traumatic stress (GPS-PTSD-5), cognitive functioning (CLC-IC) and social  
32 factors were used. Statistical analyses: linear mixed-effects model.  
33  
34  
35  
36  
37  
38

39 **Results:** This study included 67 COVID-19 ICU survivors (mean age 62y, 78% male). Mean USER-P  
40 restrictions scores increased over time, with mean participation levels increasing from 62.0 (SD 23.7),  
41 76.5 (SD 20.4) to 86.1 (SD 16.8) at one, three and 12 months respectively. After one year, 50% had not  
42 fully resumed work and restrictions were reported in physical exercise (51%), household duties (46%),  
43 and leisure activities (29%). Self-reported complaints of breathlessness and fatigue, more perceived  
44 limitations in daily life, as well as personal factors (less pro-active coping style and anxiety/depression  
45 complaints) were associated with delayed recovery of participation.  
46  
47  
48  
49  
50  
51  
52  
53  
54  
55  
56  
57  
58  
59  
60

1  
2  
3 45 **Conclusions:** This study supports the view that an integral vision of health is important when looking  
4  
5 46 at the long-term consequence of post-IC COVID-19. Personal factors such as having a less proactive  
6  
7 47 coping style or mental impairments early on contribute to delayed recovery.  
8  
9

10 48

11  
12  
13 49 **Keywords:** COVID-19, Critical care, Rehabilitation medicine  
14  
15

16 50

17  
18  
19 51 **Strengths and limitations of this study**

- 20  
21 52 - This study only included the most severely affected post-ICU COVID-19 patients referred to  
22  
23 53 inpatient rehabilitation.  
24  
25 54 - This study used physical examination as well as questionnaires, which means that there was a  
26  
27 55 combination of objective and subjective measurements.  
28  
29 56 - Although the sample size is small, a large number of factors were studied for their effect on  
30  
31 57 the course of participation recovery.  
32  
33 58 - Twenty-three patients were not approached in time for consent to participate.  
34  
35 59 - The lockdown and the inability to perform social and outdoor activities may have affected the  
36  
37 60 total USER-P score.  
38  
39  
40

41 61

42  
43 62 Word count abstract: 284

44  
45 63 Word count main text: 2998

46  
47 64 Number of figures and tables: 6  
48  
49  
50

51 65  
52  
53  
54  
55  
56  
57  
58  
59  
60

## 66 Introduction

67 In the first wave of the coronavirus disease 2019 (COVID-19) pandemic in the Netherlands about 2%  
68 of all confirmed cases needed treatment in an intensive care unit (ICU) (1,2). About three-quarters of  
69 those admitted to an ICU had acute respiratory distress syndrome (3) and many patients were  
70 recorded as having shock, acute kidney injury, thrombotic complications and/or cardiac injury (3).

71 Survivors of critical illness frequently experience new or worsening physical, cognitive and/or mental  
72 impairment, described as post intensive care syndrome (PICS) (4), which can have long-term effects on  
73 participation and quality of life (5–7). Immediately after ICU admission, COVID-19 patients display  
74 various physical impairments such as exertional hypoxemia, reduced overall muscle force, shoulder  
75 problems, dysphagia, and anxiety complaints (8). In the subacute phase (one to three months after ICU  
76 discharge) 90% of the post-ICU COVID patients still experience symptoms affecting at least one of the  
77 PICS domains (9,10). Due to the varying impact of severe COVID-19, patients may experience  
78 limitations in their participation in daily living, social functioning or work performance (11,12).  
79 Restrictions in participation may eventually lead to an increase in (healthcare) costs, since patients  
80 need for example more professional assistance in their ADL or return to work is delayed. Although  
81 impairments in various domains of functioning have been identified, any long-term effects on the  
82 recovery of participation are unclear. The effect that this new disease may have on participation,  
83 combined with the large number of COVID-19 ICU survivors, points to the need to study factors that  
84 could delay the recovery in participation of survivors after ICU discharge. Consequently, the present  
85 study aimed to evaluate the recovery of participation during the first year after ICU discharge in post-  
86 COVID-19 patients. The secondary aim was to identify early determinants associated with recovery of  
87 participation.

88

89

## 90 **Methods**

### 91 Study design and participants

92 This prospective cohort study was performed at Adelante Zorggroep, a rehabilitation centre in the  
93 South of the Netherlands. Patients were eligible to participate in the study if (1) referred for inpatient  
94 rehabilitation after ICU discharge for COVID-19 pneumonia/ respiratory insufficiency, (2) aged 18 or  
95 older and (3) functioning independently before their COVID-19 infection. The exclusion criterion was  
96 not speaking or reading the Dutch language fluently. All patients received inpatient multidisciplinary  
97 rehabilitation treatment including physiotherapy, occupational therapy, speech therapy and  
98 psychology according to the patient's limitations and needs. All participants provided written informed  
99 consent. Patients were transferred to the rehabilitation centre from 7 (2 academic and 5 regional)  
100 hospitals in the region. COVID-19 was confirmed with a SARS-COV-19 positive PCR test. The local  
101 medical ethics committee Zuyderland METC (METCZ20200086) approved the study.

102 Patient and public involvement: Patients and/or the public were not involved in the design, or conduct,  
103 or reporting, or dissemination plans of this research.

### 105 Data collection

106 Data was collected in the form of baseline information at admission to the rehabilitation centre and  
107 through physical examination and self-administered questionnaires after one (T1), three (T2) and  
108 twelve months (T3). Since different domains of functioning can be affected by COVID-19,  
109 measurements were chosen based on an integral vision of health and included body function  
110 impairments, activity limitations and participation restrictions as well as personal and social factors.  
111 These factors are derived as main domains in the International Classification of Functioning, Disability  
112 and Health (ICF) that supports the classification of health and health-related conditions and their effect  
113 on social participation (Figure 1) (13).



1  
2  
3 114 Primary outcome variable: Participation in society was assessed by the 'Utrecht Scale for Evaluation of  
4  
5 115 Rehabilitation-Participation (USER-P) restriction subscale'. The restriction subscale consists of 11 items  
6  
7 116 on restrictions in vocational, leisure and social activities. Items are rated from 0 'not possible' to 3  
8  
9  
10 117 'without difficulty' and a 'not applicable' option. The total score ranges from 0 to 100, with higher  
11  
12 118 scores indicating fewer restrictions in participation (14,15).

13  
14  
15 119 Data on age, sex, comorbidities and parameters related to critical illness severity was collected from  
16  
17 120 the medical transfer letters. Comorbidities were classed into diabetes mellitus, hypertension,  
18  
19 121 cardiovascular disease, lung disease and psychiatric disorders. Parameters related to severity of the  
20  
21 122 critical illness were length of ICU stay, invasive mechanical ventilation (IMV) (yes/no) and duration of  
22  
23 123 invasive IMV. The duration of the inpatient rehabilitation was also recorded.

24  
25  
26 124 Physical examination: Assessment of Muscle strength, functional exercise capacity and pulmonary  
27  
28 125 function were part of a physical examination. To measure muscle strength, a handheld dynamometer  
29  
30 126 (HHD) was used (16) to assess the following muscle groups: shoulder abduction, elbow flexion, wrist  
31  
32 127 extension, hip flexion and knee extension, all on the patient's dominant side. HHD values were  
33  
34 128 measured in Newtons and percentages of the norm compared with healthy persons of the same sex,  
35  
36 129 age, and weight (17,18). For the clinical assessment of the functional exercise capacity, the 6-minute  
37  
38 130 walk test (6-MWT) was used (19). To evaluate pulmonary function Quark PFT spirometry (Cosmed,  
39  
40 131 Italy) was used (20). Forced expiratory volume in the first second (FEV<sub>1</sub>), forced vital capacity (FVC) and  
41  
42 132 FEV<sub>1</sub>/FVC ratio were included in the analysis, displayed in percentage of the norm.

43  
44  
45 133 In addition, self-administered questionnaires were used. Breathlessness was assessed by the MRC  
46  
47 134 breathlessness scale, which comprises five statements that range from 0 'no trouble with  
48  
49 135 breathlessness' to 5 'I am too breathless to leave the house' (21). The Numerical Rating Scale (NRS)  
50  
51 136 was used for assessing pain. Patients were asked to rate their mean and maximum pain intensities in  
52  
53 137 the last seven days, ranging from 0-10, with 0 indicating 'no pain' and 10 indicating 'the worst  
54  
55 138 imaginable pain' (22). The multidimensional Fatigue Inventory (MFI) is a 20-item metric for fatigue  
56  
57  
58  
59  
60

1  
2  
3 139 severity. It has 5 dimensions: general fatigue, physical fatigue, mental fatigue, reduced motivation and  
4  
5 140 reduced activity. Each item ranges from 1 'absence of fatigue' to 5 'severe fatigue'. A total fatigue score  
6  
7 141 is calculated as the sum of the subscale scores (20–100). Higher total scores indicate higher levels of  
8  
9 142 fatigue (23). The perceived limitations in daily life were assessed using the PROMIS physical function  
10  
11 143 short form 8b. This survey was created for adults with chronic illnesses and it contains eight questions  
12  
13 144 ranging from 1 'unable to do' to 5 'without any difficulty' (24). Calculating T-scores, where higher  
14  
15 145 scores indicate better physical function (25). Anxiety and depression complaints were assessed with  
16  
17 146 the Hospital Anxiety and Depression Scale (HADS). A score  $\geq 8$  on either subscale was considered to be  
18  
19 147 substantial anxiety or depression symptoms (26). Post-traumatic stress complaints were assessed  
20  
21 148 using the Global Psychotrauma Screen – Post Traumatic Stress Disorder (GPS-PTSD-5). The regular GPS  
22  
23 149 consists of 22 items, item 1-5 can be used to generate a GPS-PTDS-5 score (range 0-5), a score  $\geq 3$   
24  
25 150 indicates PTSD (27). Cognitive functioning was assessed using the Checklist for Cognitive consequences  
26  
27 151 after an ICU-admission (CLC-IC). The CLC-IC consists of 10 items; higher scores indicate more cognitive  
28  
29 152 problems experienced in daily life (range 0-10). The CLC-IC is based on the CLCE-24 (28). Proactive  
30  
31 153 coping skills were assessed at T3 with the Utrecht Proactive Coping Scale (UPCC), which is a 21-item  
32  
33 154 self-assessment tool scored on a 4-point scale ranging from 'not competent at all' to 'competent'. The  
34  
35 155 total score was the average for all item scores (range 1–4), where higher scores indicate higher levels  
36  
37 156 of proactive coping (29). Premorbid social- and work situations were collected at T1.  
38  
39  
40  
41  
42  
43  
44  
45  
46

#### 47 Statistical analyses

48  
49  
50 159 Results are reported as mean and standard deviation (SD) or as median and interquartile range (IQR)  
51  
52 160 depending on distribution. Recovery of participation levels over time was assessed with a linear mixed-  
53  
54 161 effects model for repeated measures. Patient characteristics in the domains of body function, activity  
55  
56 162 limitations, personal and social factors at T0 and 1 month after admission in the rehabilitation centre  
57  
58 163 (T1) were added to separate models that also included time and the interaction between that covariate  
59  
60

1  
2  
3 164 and time. Next, for illustrative purposes only, linear mixed-effects model analyses were stratified  
4  
5 165 according to patient characteristics that were significantly associated with the course of recovery of  
6  
7 166 participation levels to visualize different patterns of change over time. A  $p < 0.05$  was considered as  
8  
9  
10 167 statistically significant. Statistical analyses were performed with IBM SPSS statistics 26.0 (SPSS Inc.  
11  
12 168 Chicago, IL).

13  
14  
15 169

## 170 **Results**

171 During the first COVID-19 wave between April 2 and June 30, 2020, 103 post-ICU patients were  
172 admitted for inpatient rehabilitation. Of these, twenty-three patients were missed since this study was  
173 part of clinical practice in a very dynamic period (first COVID-19 wave) and 13 patients were excluded  
174 for reasons given in figure 2. The study sample consisted of 67 patients (78% male) with a median age  
175 of 62 (IQR 57-68) and a median length of stay of 20 (12-33) days in the ICU and 19 (11-31) days inpatient  
176 rehabilitation (Table 1). Overall, this shows an improvement in muscle strength and functional exercise  
177 capacity (6MWT), whereas fatigue complaints and perceived limitations in daily life seem to decrease  
178 in the first year after ICU discharge (Table 1).

179 Participation restrictions improved in the first year after ICU discharge due to a COVID-19 infection  
180 (Figure 3). Mean participation levels increased from 62.0 (6.1 95%CI), 76.5 (4.6 95%CI) to 86.1 (5.5  
181 95%CI) at one, three and 12 months respectively. One year after ICU discharge, 50.8% of the patients  
182 still reported restrictions in physical exercise, 45.8% in performing housekeeping and 28.8% in  
183 performing leisure activities. After one year work is not applicable in 42.4% of all patients, which is  
184 comparable to the premorbid work situation, where 58% of all patients were employed. One year after  
185 ICU discharge 28.8% of all patients still reported restrictions in work/education. Taking into account  
186 the patients who were not working pre-illness, means that 50% of the pre-illness working patients had  
187 not fully resumed work after one year (Table 1).

1  
2  
3 188 Regarding the second aim, in the ICF domain body functions, breathlessness (MRC breathlessness),  
4  
5 189 regression coefficient: 0.60 (95%CI 0.23-0.97; p-value <0.01) and fatigue (MFI), regression coefficient:  
6  
7 190 0.07 (95%CI 0.03-0.09; p-value <0.01) were the only physical variables that influenced participation  
8  
9  
10 191 recovery over time. For the ICF domain activities, the perceived limitations in daily life (PROMIS 8b)  
11  
12 192 showed a different pattern in the recovery of participation restriction level, regression coefficient: -  
13  
14 193 0.11 (95%CI -0.12 to -0.05; p-value <0.01). In addition, personal factors like coping style (UPCC)  
15  
16 194 regression coefficient: -2.39 (95%CI -4.20 to -0.06; p-value 0.01), anxiety (HADS anxiety) regression  
17  
18 195 coefficient: 0.17 (95%CI 0.02-0.31; p-value 0.03) and depression (HADS depression) regression  
19  
20 196 coefficient: 0.19 (95%CI 0.07-0.31; p-value <0.01) showed different paths in resuming the level of  
21  
22 197 participation over time. Other early determinants show no significant difference in the recovery of  
23  
24 198 participation (Table 2).

25  
26  
27  
28 199 Participation levels increased significantly between 1 and 3 months and between 3 and 12 months in  
29  
30 200 patients who reported more breathlessness, more fatigue or more limitations in daily life and those  
31  
32 201 with a less pro-active coping style. In contrast, patients with less breathlessness, fewer fatigue  
33  
34 202 complaints, fewer restrictions in daily life and a more pro-active coping style showed no significant  
35  
36 203 increase between 3 and 12 months (Figure 4). In patients with a HADS anxiety score  $\geq 8$ , no differences  
37  
38 204 were found in participation levels in the first 3 months, while there was a significant difference in  
39  
40 205 recovery of participation levels between 3 and 12 months. While participation levels significantly  
41  
42 206 improved between 1 and 3 months and between 3 and 12 months for those experiencing fewer anxiety  
43  
44 207 complaints. For depressive symptoms, both groups improved significantly in participation levels  
45  
46 208 between 1 to 3 months and between 3 to 12 months, although a steeper curve is seen in the recovery  
47  
48 209 of participation levels at 3 to 12 months in patients with more depressive symptoms.

49  
50  
51  
52  
53 210  
54  
55  
56  
57  
58  
59  
60

| Table 1                                                            | T0           | One month (T1)  | Three months (T2) | Twelve months (T3) |
|--------------------------------------------------------------------|--------------|-----------------|-------------------|--------------------|
| <b>Baseline characteristics</b>                                    |              |                 |                   |                    |
| Age, years; n=67; median (IQR)                                     | 62 (57 – 68) | -               |                   |                    |
| Sex; n=67; No (%)                                                  |              |                 |                   |                    |
| - Men                                                              | 52 (77.6%)   | -               |                   |                    |
| - Women                                                            | 15 (22.5%)   | -               |                   |                    |
| <b>Highest level of education; n=62; No (%)</b>                    |              |                 |                   |                    |
| - Lower education                                                  | 42 (67.7%)   | -               |                   |                    |
| - Middle education                                                 | 16 (25.8%)   | -               |                   |                    |
| - Higher education                                                 | 4 (6.5%)     | -               |                   |                    |
| <b>Work situation; n=62; No (%)</b>                                |              |                 |                   |                    |
| - Full-time job                                                    | 26 (41.9%)   | -               |                   |                    |
| - Parttime job                                                     | 10 (16.1%)   | -               |                   |                    |
| - Retired                                                          | 18 (29.0%)   | -               |                   |                    |
| - Not working otherwise                                            | 8 (12.9%)    | -               |                   |                    |
| <b>Comorbidities; n=67; no (%)</b>                                 |              |                 |                   |                    |
| - Asthma / bronchitis                                              | 6 (9.0%)     | -               |                   |                    |
| - Chronic obstructive pulmonary disease                            | 4 (6.0%)     | -               |                   |                    |
| - Obstructive sleep apnoea syndrome                                | 12 (17.9%)   | -               |                   |                    |
| - Diabetes Mellitus                                                | 12 (17.9%)   | -               |                   |                    |
| - Hypertension                                                     | 23 (34.3%)   | -               |                   |                    |
| - Cardiovascular disease                                           | 21 (31.3%)   | -               |                   |                    |
| - Chronic kidney disease                                           | 5 (7.4%)     | -               |                   |                    |
| - Depression                                                       | 4 (6.0%)     | -               |                   |                    |
| - None of the above comorbidities                                  | 25 (37.3%)   | -               |                   |                    |
| <b>Parameters related to severity critical illness</b>             |              |                 |                   |                    |
| - Duration intensive care unit, in days; n=59; median (IQR)        | 20 (12 – 33) | -               |                   |                    |
| - Invasive mechanical ventilation; n=67; No (%)                    | 58 (86.6%)   | -               |                   |                    |
| - Duration IMV, in days; n=55; median (IQR)                        | 17 (9 – 24)  | -               |                   |                    |
| <b>Duration inpatient rehabilitation, days; n=67; median (IQR)</b> |              |                 |                   | 19 (11 – 31)       |
| <b>Coping style (UPCC); n=58; mean (SD)</b>                        |              |                 |                   | 3.0 (0.2)          |
| <b>USER-P restriction subscale <sup>a</sup></b>                    |              |                 |                   |                    |
| - Work/education                                                   | -            | 64.4%           | 60.6%             | 28.8%              |
| - Housekeeping                                                     | -            | 74.6%           | 65.2%             | 45.8%              |
| - Mobility                                                         | -            | 59.3%           | 43.9%             | 16.9%              |
| - Physical exercise                                                | -            | 79.7%           | 60.6%             | 50.8%              |
| - Going out                                                        | -            | 45.8%           | 24.2%             | 10.2%              |
| - Outdoor activities                                               | -            | 54.2%           | 36.4%             | 16.9%              |
| - Leisure activities                                               | -            | 42.4%           | 28.8%             | 20.3%              |
| - Partner relationship                                             | -            | 28.8%           | 24.2%             | 16.9%              |
| - Visits to family/friends                                         | -            | 45.8%           | 31.8%             | 10.2%              |
| - Visits from family/friend                                        | -            | 32.2%           | 13.6%             | 8.5%               |
| - Telephone/PC contact                                             | -            | 15.3%           | 13.6%             | 11.9%              |
| <b>Physical examination:</b>                                       |              |                 |                   |                    |
| - Muscle strength                                                  |              |                 |                   |                    |
| - Mean muscle force (HHD), mean (SD)                               | -            | 75.7% (15.3)    | 93.5% (24.6)      | 101.4% (15.3)      |
| - 6MWT; mean (SD)                                                  | -            | 467.8m (91.2)   | 518.3m (102.5)    | 531.0m (86.5)      |
| - Pulmonary function; mean (SD)                                    |              |                 |                   |                    |
| - FEV1                                                             | -            | 87.5% (15.8)    | 93.8% (19.9)      | 93.6% (17.7)       |
| - FVC                                                              | -            | 85.9% (16.3)    | 92.8% (18.7)      | 92.2% (15.6)       |
| - FEV1/FVC ratio                                                   | -            | 79.6% (9.1)     | 77.3% (10.6)      | 79.1% (11.2)       |
| <b>Self-administered questionnaires:</b>                           |              |                 |                   |                    |
| - Breathlessness (MRC); median (IQR)                               | -            | 2.0 (1.0 – 3.0) | 1.0 (1.0 – 2.0)   | 1.0 (1.0 – 2.0)    |
| - Pain (NRS); median (IQR)                                         | -            | 2.0 (1.0 – 3.5) | 2.0 (1.5 – 5.0)   | 2.0 (1.0 – 3.0)    |
| - Fatigue (MFI); mean (SD)                                         | -            | 58.6 (14.0)     | 56.0 (15.3)       | 50.8 (17.6)        |
| - perceived limitations in daily life (PROMIS 8b); mean (SD)       | -            | 34.8 (7.4)      | 39.2 (6.9)        | 44.8 (8.0)         |
| - Anxiety (HADS-anxiety); median (IQR)                             | -            | 3.0 (1.0 – 5.0) | 3.0 (1.0 – 6.0)   | 2.0 (0.5 – 6.0)    |
| - Exceeded anxiety cut-off ≥8                                      | -            | 7/57 (12.3%)    | 11/66 (16.7%)     | 10/59 (16.9%)      |
| - Depression (HADS depression); median (IQR)                       | -            | 2.0 (1.5 – 6.0) | 3.0 (1.0 – 6.0)   | 2.0 (1.0 – 4.0)    |
| - Exceeded depression cut-off ≥8                                   | -            | 10/59 (16.9%)   | 13/66 (19.7%)     | 10/59 (16.9%)      |
| - Post-traumatic stress (GPS-PTSD-5); median (IQR)                 | -            | 0.0 (0.0 – 1.0) | 0.0 (0.0 – 1.0)   | 0.0 (0.0 – 1.0)    |
| - Exceeded PTSD cut-off ≥3                                         | -            | 5/59 (8.5%)     | 8/66 (12.1%)      | 3/59 (5.1%)        |
| - Cognitive impairments (CLC-IC); median (IQR)                     | -            | 3.0 (1.0 – 6.0) | 4.0 (1.0 – 7.0)   | 2.0 (0.0 – 7.0)    |

Table 1, overview of the baseline characteristics (T0) and the physical examination and self-administered questionnaires at T1, T2 and T3. Abbreviations: IMV, Invasive mechanical ventilation; UPCC, Utrecht Proactive Coping Scale; USER-P, Utrecht Scale for Evaluation of Rehabilitation-Participation; HHD, handheld dynamometer; 6MWT, 6 minute walking test; FEV1, Forced expiratory volume in the first second; FVC, Forced vital capacity; n.a., not applicable; MFI, multidimensional Fatigue Inventory; HADS, Hospital Anxiety and Depression Scale; GPS, The Global Psychotrauma Screen; CLC-IC, Checklist for Cognitive consequences after an ICU-admission. <sup>a</sup> Restriction items values are percentages of patients who are restricted or dissatisfied.

| Table 2                                         | Estimate (95% CI)     | p-value |
|-------------------------------------------------|-----------------------|---------|
| <b>Baseline characteristics</b>                 |                       |         |
| Age                                             | -0.03 (-0.08 – 0.02)  | 0.29    |
| Sex                                             | 0.72 (-0.32 – 1.76)   | 0.17    |
| Number of comorbidities                         | 0.04 (-0.34 – 0.42)   | 0.83    |
| Duration of inpatient rehabilitation            | 0.03 (-0.00 – 0.06)   | 0.07    |
| Coping style (UPCC)                             | -2.39 (-4.20 – -0.06) | 0.01*   |
| <b>ICU-stay specific parameters</b>             |                       |         |
| Length of ICU stay                              | 0.02 (-0.01 – 0.06)   | 0.21    |
| Duration of invasive mechanical ventilation     | 0.02 (-0.02 – 0.05)   | 0.37    |
| <b>Physical examination</b>                     |                       |         |
| Muscle strength                                 |                       |         |
| - Mean muscle force (HHD)                       | -0.02 (-0.06 – 0.01)  | 0.18    |
| 6MWT                                            | -0.00 (-0.01 – 0.01)  | 0.65    |
| Pulmonary function                              |                       |         |
| - FEV1                                          | -0.02 (-0.06 – 0.01)  | 0.16    |
| - FVC                                           | -0.03 (-0.06 – 0.00)  | 0.07    |
| - FEV1/FVC ratio                                | 0.04 (-0.02 – 0.09)   | 0.24    |
| <b>Self-administered questionnaires</b>         |                       |         |
| Breathlessness (MRC)                            | 0.60 (0.23 – 0.97)    | < 0.01* |
| Pain (NRS)                                      | -0.03 (-0.28 – 0.23)  | 0.84    |
| Fatigue (MFI)                                   | 0.07 (0.03 – 0.09)    | < 0.01* |
| Perceived limitations in daily life (PROMIS 8b) | -0.11 (-0.12 – -0.05) | < 0.01* |
| Anxiety (HADS-anxiety)                          | 0.17 (0.02 – 0.31)    | 0.03*   |
| Depression (HADS depression)                    | 0.19 (0.07 – 0.31)    | < 0.01* |
| Post-traumatic stress (GPS-PTSD-5)              | 0.24 (-0.21 – 0.70)   | 0.30    |
| Cognitive impairments (CLC-IC)                  | 0.09 (-0.07 – 0.24)   | 0.27    |

Table 2; linear mixed model for covariates at T0 or T1, as an interaction between covariate and time (1, 3, and 12 months), for the recovery of participation levels. \* p < 0.05.

Abbreviations: UPCC, Utrecht Proactive Coping Scale; HHD, handheld dynamometer; 6MWT, 6 minute walking test; FEV1, Forced expiratory volume in the first second; FVC, Forced vital capacity; MFI, multidimensional Fatigue Inventory; HADS, Hospital Anxiety and Depression Scale; GPS, The Global Psychotrauma Screen; CLC-IC, Checklist for Cognitive consequences after an ICU-admission.

## Discussion

In this prospective cohort study, recovery of participation during the first year after ICU discharge in COVID-19 ICU survivors who needed inpatient rehabilitation was evaluated and the association between early levels of body function impairments, activity limitations and personal and social factors on recovery were estimated. It is seen that in the first year after ICU discharge patients were able to improve their level of participation. Nevertheless, after one year, there are still important limitations in participation in daily life, mainly in resuming work, physical exercise, housekeeping and leisure activities. As early determinants for a delay in the resumption of a patient's habitual level of participation levels over the first year, higher levels of self-experienced breathlessness and fatigue

1  
2  
3 233 complaints, more perceived limitations in daily life as well as personal factors (having a less pro-active  
4  
5 234 coping style, anxiety complaints or depression complaints) were found.  
6  
7 235 Heesakker et al. reported that in patients who survived one year following ICU treatment for COVID-  
8  
9 236 19, physical, mental, or cognitive symptoms were often reported (30). This corresponds with the  
10  
11 237 findings of the current study, whereas various physical, mental and cognitive impairments were seen  
12  
13 238 one year after ICU admission. However, to our knowledge, this is the first study to report differences  
14  
15 239 in the resumption of participation levels in post-ICU COVID-19 patients. Findings on current  
16  
17 240 participation restriction levels one year after ICU discharge are in line with previous studies that  
18  
19 241 assessed changes in recovery after a stroke or other diagnoses groups (31–33).  
20  
21  
22  
23 242 Moreover, these results showed that higher scores of self-experienced breathlessness, fatigue and  
24  
25 243 more perceived limitations in daily life in the early phase of rehabilitation were associated with a  
26  
27 244 delayed recovery of participation levels over the first year. Furthermore, patients with a less active  
28  
29 245 coping style, those that were more anxious or reported to perceive more depressive complaints had a  
30  
31 246 delayed recovery of their level of participation over the first year. For all these determinants,  
32  
33 247 participation levels also appeared to be lower in the early phase of rehabilitation. These findings  
34  
35 248 indicate that patients with a higher level of anxiety and those with a higher level of depression had a  
36  
37 249 significantly slower improvement in participation levels during the first months, followed by a more  
38  
39 250 progressive recovery, especially in the last months. In addition, patients with more breathlessness  
40  
41 251 complaints or more fatigue complaints or more perceived limitations in daily life in the early phase of  
42  
43 252 rehabilitation and patients with a less pro-active coping style showed a more progressive recovery of  
44  
45 253 participation levels especially in the last months.  
46  
47  
48  
49 254 Complaints of fatigue or breathlessness may be due to underlying medical problems or to the  
50  
51 255 contribution of personal factors. A previous study showed significant recovery of respiratory function  
52  
53 256 and physical performance in the first year after ICU discharge due to COVID-19. Nevertheless, patients  
54  
55 257 still experience breathlessness and fatigue complaints after one year (34). Another remarkable finding  
56  
57 258 in current study was that early determinants related to the severity of the COVID-19 infection period  
58  
59  
60



1  
2  
3 259 itself (such as ICU stay-specific parameters and physical parameters as age, sex, muscle strength,  
4  
5 260 functional exercise capacity and pulmonary function) did not individually explain progress in recovery  
6  
7 261 of participation over time. Contrary to expectations, this may indicate that non-physical factors such  
8  
9 262 as coping style, subjectively experienced physical impairments (including fatigue and breathlessness)  
10  
11 263 and mental impairments (such as anxiety and depressive symptoms) seem more important to  
12  
13 264 determine progress in recovering the level of participation. Previous literature on post-ICU patients  
14  
15 265 also indicated that critical care recovery has largely focused on post-ICU impairments experienced by  
16  
17 266 patients. Whereas the positive aspects of recovery within the rehabilitation phase, including coping  
18  
19 267 style and resilience seems to be ignored, while these factors are important for optimal recovery  
20  
21 268 (35,36).  
22  
23  
24  
25  
26  
27

#### 28 270 Implications for clinical practice and further research

29  
30 271 This study underlines the importance of looking at the long-term consequence of (COVID-19) ICU  
31  
32 272 survivors with an integral vision of health. Early detection of a less proactive coping style or mental  
33  
34 273 impairments seems important and should therefore be included in screening during early  
35  
36 274 multidisciplinary rehabilitation. Further research is needed to examine the appropriate (early)  
37  
38 275 treatment to target changes in coping style or improve resilience. In addition, it can be speculated that  
39  
40 276 our findings in ICU survivors can be also extrapolated to other ICU survivors or patients with post-  
41  
42 277 COVID-19 syndrome, that had an initial mild infection Moreover, further research may focus on coping  
43  
44 278 style and mental impairments on the recovery of participation restrictions over time in these patients.  
45  
46  
47

48 279

#### 50 280 Strengths and limitations

51  
52 281 A strength of the present study is that it only included the most severely affected post-ICU COVID-19  
53  
54 282 patients referred to inpatient rehabilitation. In addition, this study used physical examination as well  
55  
56 283 as questionnaires, which means that there was a combination of objective and subjective  
57  
58 284 measurements. It is notable that even in the most severely affected COVID-19 patients delayed  
59  
60



1  
2  
3 285 recovery of participation is associated with self-experienced physical impairments, mental  
4  
5 286 impairments and coping style.  
6  
7 287 Nevertheless, some limitations of the current study need to be considered. First, although the sample  
8  
9 288 size is small, a large number of factors were studied for their effect on the course of participation  
10  
11 289 recovery. Because this is the first exploratory study on the recovery of participation and its association  
12  
13 290 with early factors, it was important to look at factors within different domains. Second, due to the high  
14  
15 291 workload on the ward, 23 patients were not approached in time for consent to participate. In our  
16  
17 292 opinion, this is unlikely to have led to selection bias, but this cannot be excluded. Finally, the lockdown  
18  
19 293 and the inability to perform social and outdoor activities may have affected the total USER-P score as  
20  
21 294 this scale allows the rating of 'not applicable'. Since the study- and lockdown period were similar for  
22  
23 295 all patients, we expect no difference in the study patients. Although it may have affected the recovery  
24  
25 296 course of participation recovery for the entire patient group, it is not expected to have affected the  
26  
27 297 predictors.  
28  
29  
30  
31  
32  
33

### 34 299 Conclusion

36 300 For patients admitted to an ICU for COVID19, the level of participation improves in the first year after  
37  
38 301 ICU discharge. However, at one year after discharge, many patients still experience limitations  
39  
40 302 regarding participation in daily life, mainly in resuming work, physical exercise, housekeeping and  
41  
42 303 leisure activities. Progress of recovery in participation in the first year after discharge was associated  
43  
44 304 with early determinants in coping style, subjectively experienced physical impairments (breathlessness  
45  
46 305 and fatigue) and mental impairments (anxiety and depression), but not with medical variables. This  
47  
48 306 study supports the need for an integral perspective on health to facilitate the identification of factors  
49  
50 307 that delay the recovery trajectory for participation in the first year after ICU discharge. Personal factors  
51  
52 308 such as a less proactive coping style and more anxiety- or depression complaints seem relevant to this.  
53  
54 309 Rehabilitation care needs to anticipate on these topics, starting in the early rehabilitation phase of  
55  
56 310 post-ICU COVID-19 care.  
57  
58  
59  
60

1  
2  
3 311 Acknowledgements: We would like to thank all physiotherapist and students for their valuable  
4  
5 312 contribution for collecting all data. We also thank all participants.  
6  
7

8 313 Author contributors: CW, JV, BH and SJSS were responsible for the study design. The statistical analysis  
9  
10 314 plan was designed by CW, SJSS and SvK. Statistical analysis was done by CW, with control of SJSS and  
11  
12 315 SvK. Practical implication was done by CW, SvS and YH. The first draft of the paper was written by CW  
13  
14 316 and all co-authors reviewed and approved it for submission. CW and JV are the guarantors. The  
15  
16 317 corresponding author attests that all listed authors meet authorship criteria and that no others  
17  
18 318 meeting the criteria have been omitted.  
19  
20

21  
22 319 Funding: This research received no specific grant from any funding agency in the public, commercial or  
23  
24 320 not-for-profit sectors.  
25  
26

27 321 Competing interests: All authors have completed the ICMJE uniform disclosure form at  
28  
29 322 <http://www.icmje.org/disclosure-of-interest/> and declare: no support from any organisation for the  
30  
31 323 submitted work; no financial relationships with any organisations that might have an interest in the  
32  
33 324 submitted work in the past three years; no other relationships or activities that could appear to have  
34  
35 325 influenced the submitted work  
36  
37

38  
39 326 Patient consent for publication: Not required.  
40  
41

42 327 Dissemination to participants and related patient and public communities: The study results will be  
43  
44 328 disseminated to the public through our media channels or national and international conferences.  
45  
46

47 329 Ethical approval: The local medical ethics committee Zuyderland METC (METCZ20200086) approved  
48  
49 330 the study.  
50  
51

52 331 Data availability statement: To guarantee the confidentiality of personal and health information, only  
53  
54 332 the authors have had access to the data during the study. Data is available (anonymised), but the  
55  
56 333 corresponding author must be contacted to request these data. Data will be kept for 15 years  
57  
58  
59  
60

1  
2  
3 334 Open access: This is an open access article distributed in accordance with the Creative Commons  
4  
5 335 Attribution Non Commercial (CC BY-NC 4.0) license, which permits others to distribute, remix, adapt,  
6  
7 336 build upon this work non-commercially, and license their derivative works on different terms, provided  
8  
9 337 the original work is properly cited, appropriate credit is given, any changes made indicated, and the  
10  
11  
12 338 use is non-commercial  
13  
14

15 339

17  
18 340 ORCID ID: Carolina Wiertz <https://orcid.org/0000-0002-7703-2508>  
19

20  
21 341  
22  
23  
24  
25  
26  
27  
28  
29  
30  
31  
32  
33  
34  
35  
36  
37  
38  
39  
40  
41  
42  
43  
44  
45  
46  
47  
48  
49  
50  
51  
52  
53  
54  
55  
56  
57  
58  
59  
60

1  
2  
3 342 **References**  
4

- 5 343 1. RIVM. Actuele informatie over het nieuwe coronavirus (COVID-19) [Internet]. 22-05-2020.  
6  
7 344 Available from: <https://www.rivm.nl/coronavirus-covid-19/actueel>  
8  
9  
10 345 2. NICE. COVID-19 infecties op de IC's [Internet]. Nationale Intensive Care Evaluatie. [cited 2020  
11  
12 346 Jul 2]. Available from: [https://www.stichting-nice.nl/COVID\\_rapport.pdf](https://www.stichting-nice.nl/COVID_rapport.pdf)  
13  
14  
15 347 3. Tan E, Song J, Deane AM, Plummer MP. Global Impact of Coronavirus Disease 2019 Infection  
16  
17 348 Requiring Admission to the ICU: A Systematic Review and Meta-analysis. *Chest*. 2021;  
18  
19  
20 349 4. Needham DM, Davidson J, Cohen H, Hopkins RO, Weinert C, Wunsch H, et al. Improving long-  
21  
22 350 term outcomes after discharge from intensive care unit: Report from a stakeholders'  
23  
24 351 conference. *Crit Care Med*. 2012 Feb;40(2):502–9.  
25  
26  
27 352 5. Dowdy DW, Eid MP, Sedrakyan A, Mendez-Tellez PA, Pronovost PJ, Herridge MS, et al. Quality  
28  
29 353 of life in adult survivors of critical illness: A systematic review of the literature. Vol. 31,  
30  
31 354 *Intensive Care Medicine*. Springer Verlag; 2005. p. 611–20.  
32  
33  
34  
35 355 6. Desai S V., Law TJ, Needham DM. Long-term complications of critical care. *Critical Care*  
36  
37 356 *Medicine*. 2011.  
38  
39  
40 357 7. Ohtake PJ, Lee AC, Scott JC, Hinman RS, Ali NA, Hinkson CR, et al. Physical impairments  
41  
42 358 associated with post-intensive care syndrome: Systematic review based on the world health  
43  
44 359 organization's international classification of functioning, disability and health framework.  
45  
46 360 *Physical Therapy*. 2018.  
47  
48  
49  
50 361 8. Wiertz CMH, Vints WAJ, Maas GJCM, Rasquin SMC, van Horn YY, Dremmen MPM, et al.  
51  
52 362 COVID-19: patient characteristics in the first phase of post-intensive care rehabilitation. *Arch*  
53  
54 363 *Rehabil Res Clin Transl*. 2021;  
55  
56  
57 364 9. Martillo MA, Dangayach NS, Tabacof L, Spielman LA, Dams-O'Connor K, Chan CC, et al.  
58  
59 365 Postintensive Care Syndrome in Survivors of Critical Illness Related to Coronavirus Disease  
60

- 1  
2  
3 366 2019: Cohort Study from a New York City Critical Care Recovery Clinic\*. Crit Care Med. 2021;  
4  
5  
6 367 10. Rousseau AF, Minguet P, Colson C, Kellens I, Chaabane S, Delanaye P, et al. Post-intensive care  
7  
8 368 syndrome after a critical COVID-19: cohort study from a Belgian follow-up clinic. Ann Intensive  
9  
10 369 Care. 2021;
- 11  
12  
13 370 11. Leite VF, Rampim DB, Jorge VC, de Lima M do CC, Cezarino LG, da Rocha CN, et al. Persistent  
14  
15 371 Symptoms and Disability After COVID-19 Hospitalization: Data From a Comprehensive  
16  
17 372 Telerehabilitation Program. Arch Phys Med Rehabil. 2021;
- 18  
19  
20 373 12. Veenendaal N van, van der Meulen IC, Onrust M, Paans W, Dieperink W, van der Voort PHJ.  
21  
22 374 Six-month outcomes in covid-19 icu patients and their family members: A prospective cohort  
23  
24 375 study. Healthc. 2021;
- 25  
26  
27  
28 376 13. (WHO) WHO. The international Classification of Functioning, Disability and Health - ICF  
29  
30 377 [Internet]. 2001. Available from: [https://www.who.int/classifications/international-](https://www.who.int/classifications/international-classification-of-functioning-disability-and-health)  
31  
32 378 [classification-of-functioning-disability-and-health](https://www.who.int/classifications/international-classification-of-functioning-disability-and-health)
- 33  
34  
35 379 14. Post MWM, Van Der Zee CH, Hennink J, Schafrat CG, Visser-Meily JMA, Van Berlekom SB.  
36  
37 380 Validity of the utrecht scale for evaluation of rehabilitation- participation. Disabil Rehabil.  
38  
39 381 2012;
- 40  
41  
42 382 15. Van Der Zee CH, Visser-Meily JMA, Lindeman E, Kappelle LJ, Post MWM. Participation in the  
43  
44 383 chronic phase of stroke. Top Stroke Rehabil. 2013;
- 45  
46  
47  
48 384 16. Vanpee G, Segers J, Van Mechelen H, Wouters P, Van Den Berghe G, Hermans G, et al. The  
49  
50 385 interobserver agreement of handheld dynamometry for muscle strength assessment in  
51  
52 386 critically ill patients. Crit Care Med. 2011;
- 53  
54  
55 387 17. Andrews AW, Thomas MW, Bohannon RW. Normative values for isometric muscle force  
56  
57 388 measurements obtained with hand-held dynamometers. Phys Ther. 1996;76(3):248–59.
- 58  
59  
60

- 1  
2  
3 389 18. Bohannon RW. Reference values for extremity muscle strength obtained by hand-held  
4  
5 390 dynamometry from adults aged 20 to 79 years. *Arch Phys Med Rehabil.* 1997;78(1):26–32.  
6  
7  
8 391 19. Chan KS, Pfoh ER, Denehy L, Elliott D, Holland AE, Dinglas VD, et al. Construct validity and  
9  
10 392 minimal important difference of 6-minute walk distance in survivors of acute respiratory  
11  
12 393 failure. *Chest.* 2015;
- 14  
15 394 20. Graham BL, Steenbruggen I, Barjaktarevic IZ, Cooper BG, Hall GL, Hallstrand TS, et al.  
16  
17 395 Standardization of spirometry 2019 update an official American Thoracic Society and  
18  
19 396 European Respiratory Society technical statement. *American Journal of Respiratory and*  
20  
21 397 *Critical Care Medicine.* 2019.
- 23  
24 398 21. Stenton C. The MRC breathlessness scale. *Occup Med (Lond).* 2008;
- 26  
27 399 22. Williamson A, Hoggart B. Pain: A review of three commonly used pain rating scales. *Journal of*  
28  
29 400 *Clinical Nursing.* 2005.
- 31  
32 401 23. Smets EMA, Garssen B, Bonke B, De Haes JCJM. The multidimensional Fatigue Inventory (MFI)  
33  
34 402 psychometric qualities of an instrument to assess fatigue. *J Psychosom Res.* 1995;
- 36  
37 403 24. Feng D, Laurel F, Castille D, McCormick AKHG, Held S. Reliability, construct validity, and  
38  
39 404 measurement invariance of the PROMIS Physical Function 8b—Adult Short Form v2.0. *Qual*  
40  
41 405 *Life Res.* 2020;
- 43  
44 406 25. HealthMeasures Scoring Service powered by Assessment CenterSM [Internet]. [cited 2021 Feb  
45  
46 407 20]. Available from: [https://www.assessmentcenter.net/ac\\_scoringservice](https://www.assessmentcenter.net/ac_scoringservice)
- 48  
49 408 26. Bjelland I, Dahl AA, Haug TT, Neckelmann D. The validity of the Hospital Anxiety and  
50  
51 409 Depression Scale: An updated literature review. *J Psychosom Res.* 2002;
- 53  
54 410 27. Olff M, Bakker A. Global Psychotrauma Screen (GPS); User guide september 2021 [Internet].  
55  
56 411 2016 [cited 2022 Feb 2]. Available from: <https://nl.global-psychotrauma.net/gps>
- 58  
59  
60

- 1  
2  
3 412 28. van Heugten C, Rasquin S, Winkens I, Beusmans G, Verhey F. Checklist for cognitive and  
4  
5 413 emotional consequences following stroke (CLCE-24): Development, usability and quality of the  
6  
7 414 self-report version. *Clin Neurol Neurosurg.* 2007;  
8  
9  
10 415 29. Bode C, Thoolen B, Ridder D. Het meten van proactieve copingvaardigheden: Psychometrische  
11  
12 416 eigenschappen van de Utrechtse Proactieve Coping Competentie lijst (UPCC). *Psychol en*  
13  
14 417 *Gezondh.* 2008;  
15  
16  
17 418 30. Heesakkers H, van der Hoeven JG, Corsten S, Janssen I, Ewalds E, Simons KS, et al. Clinical  
18  
19 419 Outcomes Among Patients With 1-Year Survival Following Intensive Care Unit Treatment for  
20  
21 420 COVID-19. *JAMA.* 2022;(January).  
22  
23  
24 421 31. Van Mierlo ML, Van Heugten CM, Post MWM, Hajós TRS, Kappelle LJ, Visser-Meily JMA.  
25  
26 422 Quality of life during the first two years post stroke: The Restore4Stroke cohort study.  
27  
28 423 *Cerebrovasc Dis.* 2016;  
29  
30  
31 424 32. de Graaf JA, van Mierlo ML, Post MWM, Achterberg WP, Kappelle LJ, Visser-Meily JMA. Long-  
32  
33 425 term restrictions in participation in stroke survivors under and over 70 years of age. *Disabil*  
34  
35 426 *Rehabil.* 2018;  
36  
37  
38 427 33. Mol TI, van Bennekom CA, Schepers VP, ter Hoeve N, Kruitwagen-van Reenen ET, Visser-Meily  
39  
40 428 JM, et al. Differences in Societal Participation Across Diagnostic Groups: Secondary Analyses  
41  
42 429 of 8 Studies Using the Utrecht Scale for Evaluation of Rehabilitation-Participation. *Arch Phys*  
43  
44 430 *Med Rehabil.* 2021;  
45  
46  
47 431 34. Gamberini L, Mazzoli CA, Prediletto I, Sintonen H, Scaramuzzo G, Allegri D, et al. Health-  
48  
49 432 related quality of life profiles, trajectories, persistent symptoms and pulmonary function one  
50  
51 433 year after ICU discharge in invasively ventilated COVID-19 patients, a prospective follow-up  
52  
53 434 study. *Respir Med.* 2021;  
54  
55  
56 435 35. Maley JH, Brewster I, Mayoral I, Siruckova R, Adams S, McGraw KA, et al. Resilience in  
57  
58  
59  
60

1  
2  
3 436 survivors of critical illness in the context of the survivors' experience and recovery. Ann Am  
4  
5 437 Thorac Soc. 2016;

6  
7  
8 438 36. Haines KJ, Hibbert E, Leggett N, Boehm LM, Hall T, Bakhru RN, et al. Transitions of Care After  
9  
10 439 Critical Illness-Challenges to Recovery and Adaptive Problem Solving. Crit Care Med. 2021;

11  
12  
13 440

14  
15  
16 441 **Figure Legend:**

- 17  
18 442 - Figure 1: ICF model and measurement instruments used.  
19 443 - Figure 2: Subject recruitment flowchart.  
20 444 - Figure 3: The recovery of participation levels (USER-P restriction subscale) in the first year  
21 445 after ICU discharge in post-COVID-19 patients.  
22 446 - Figure 4: The influence of early levels of body function impairments, activity limitations and  
23 447 personal factors on the recovery of participation levels (USER-P restriction subscale).



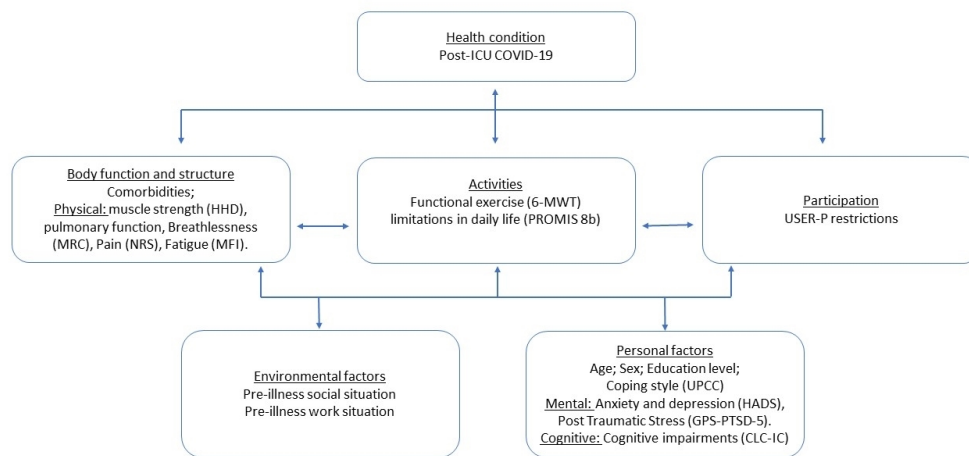

Figure 1. ICF model and measurement instruments used.

Abbreviations: PICS, post intensive care syndrome; USER-P, Utrecht Scale for Evaluation of Rehabilitation-Participation; HHD, handheld dynamometer; MFI, multidimensional Fatigue Inventory; HADS, Hospital Anxiety and Depression Scale; GPS, The Global Psychotrauma Screen; CLC-IC, Checklist for Cognitive consequences after an ICU-admission; 6-MWT, 6-minute walk test; UPCC, Utrecht Proactive Coping Scale  
ICF, International Classification of Functioning, Disability and Health

338x164mm (96 x 96 DPI)

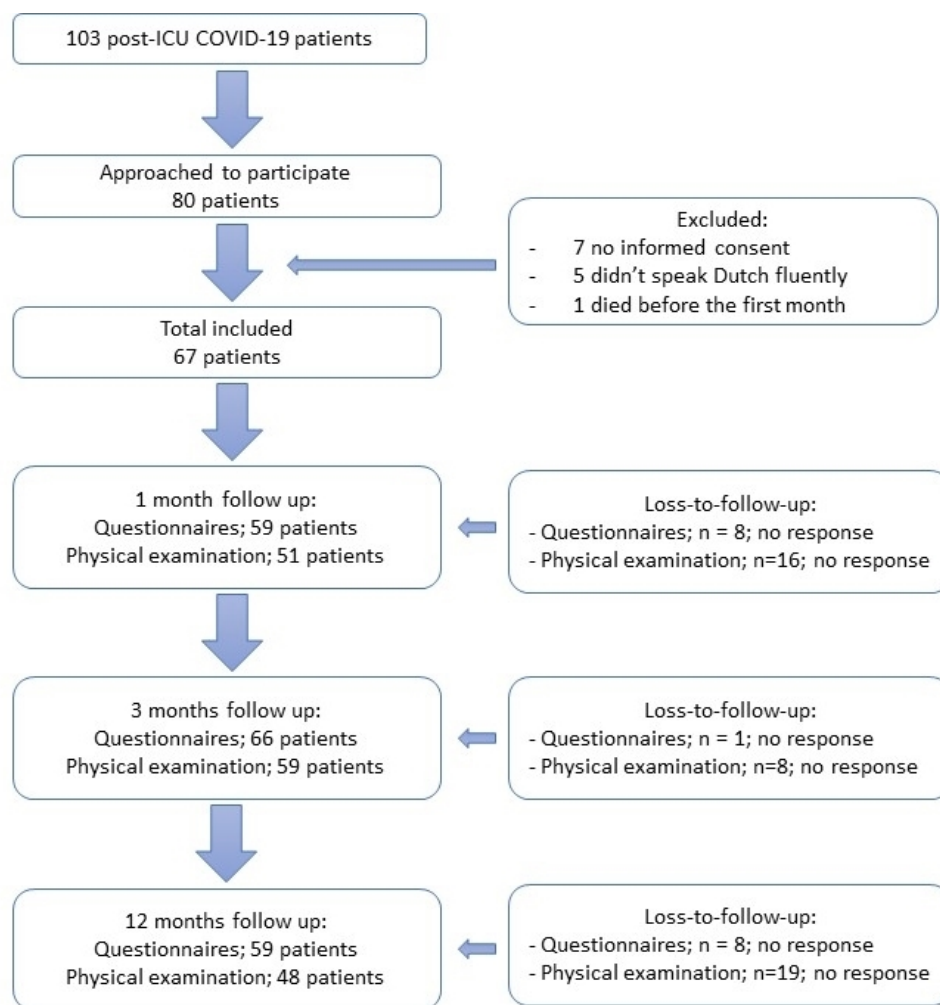

Figure 2; Subject recruitment flowchart.

179x181mm (96 x 96 DPI)

1  
2  
3  
4  
5  
6  
7  
8  
9  
10  
11  
12  
13  
14  
15  
16  
17  
18  
19  
20  
21  
22  
23  
24  
25  
26  
27  
28  
29  
30  
31  
32  
33  
34  
35  
36  
37  
38  
39  
40  
41  
42  
43  
44  
45  
46  
47  
48  
49  
50  
51  
52  
53  
54  
55  
56  
57  
58  
59  
60

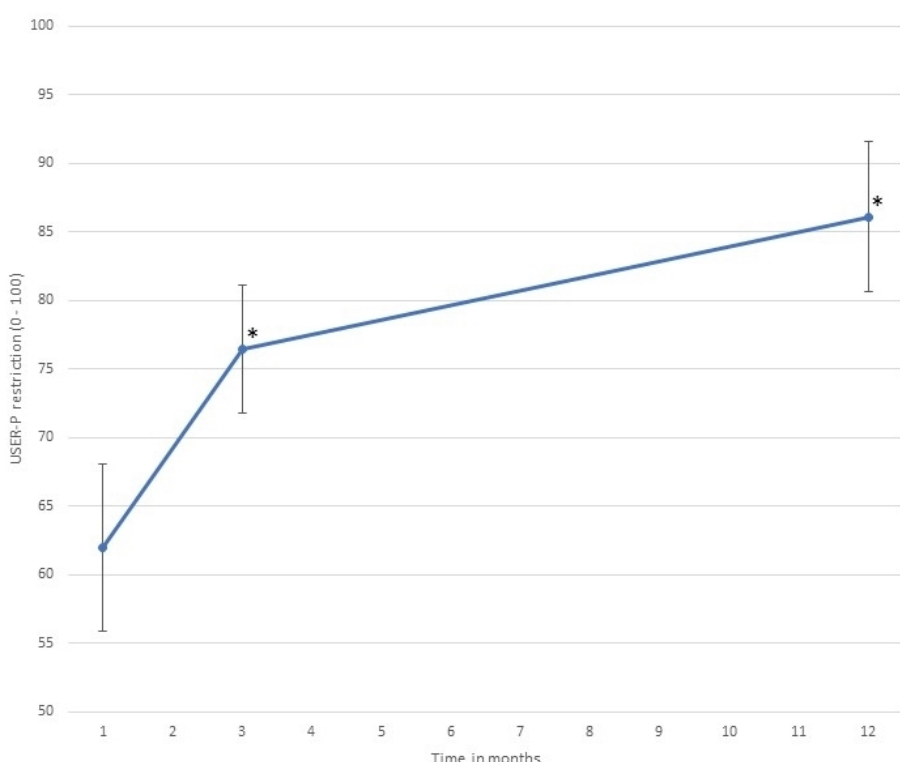

Figure 3; The recovery of participation levels (USER-P restriction subscale) in the first year after ICU discharge in post-COVID-19 patients. Results are expressed as mean with corresponding 95% confidence interval. \* p < 0.01 (compared to previous measurement moment)

202x164mm (96 x 96 DPI)

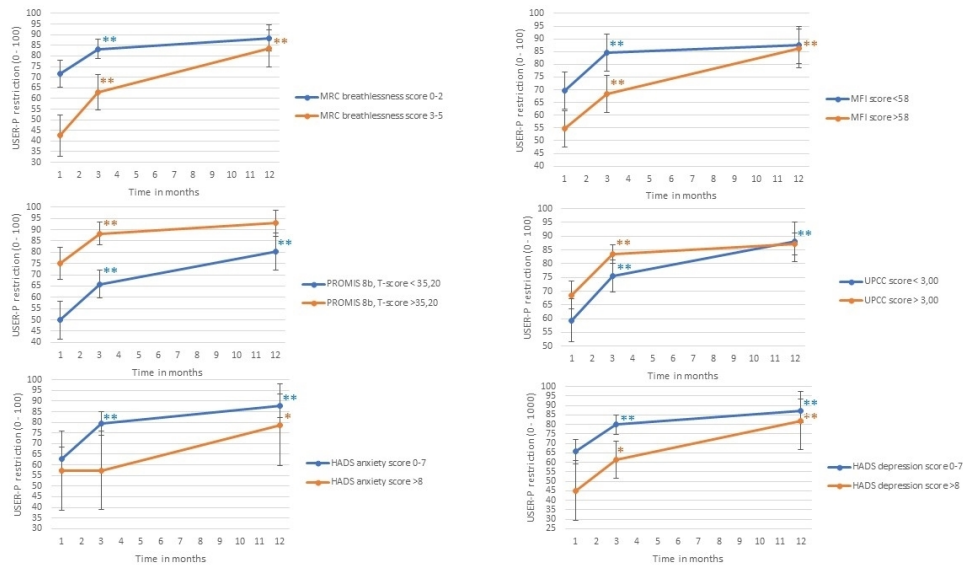

Figure 4; The influence of early levels of body function impairments, activity limitations and personal factors on the recovery of participation levels (USER-P restriction subscale). For illustrative purposes, subgroups have been created based on cut-off value (HADS) or the median if no specific cut-off value is known (MRC, MFI, PROMIS 8b, UPCC). Results are expressed as means with corresponding 95% confidence interval. \* p < 0.05 and \*\* p < 0.01 (compared to previous measurement moment).

314x176mm (96 x 96 DPI)

STROBE Statement—Checklist of items that should be included in reports of *cohort studies*

|                              | Item No | Recommendation                                                                                                                                                                                                                                                                                                                         | Page No       |
|------------------------------|---------|----------------------------------------------------------------------------------------------------------------------------------------------------------------------------------------------------------------------------------------------------------------------------------------------------------------------------------------|---------------|
| <b>Title and abstract</b>    | 1       | (a) Indicate the study's design with a commonly used term in the title or the abstract                                                                                                                                                                                                                                                 | 1             |
|                              |         | (b) Provide in the abstract an informative and balanced summary of what was done and what was found                                                                                                                                                                                                                                    | 2-3           |
| <b>Introduction</b>          |         |                                                                                                                                                                                                                                                                                                                                        |               |
| Background/rationale         | 2       | Explain the scientific background and rationale for the investigation being reported                                                                                                                                                                                                                                                   | 4             |
| Objectives                   | 3       | State specific objectives, including any prespecified hypotheses                                                                                                                                                                                                                                                                       | 4             |
| <b>Methods</b>               |         |                                                                                                                                                                                                                                                                                                                                        |               |
| Study design                 | 4       | Present key elements of study design early in the paper                                                                                                                                                                                                                                                                                | 5             |
| Setting                      | 5       | Describe the setting, locations, and relevant dates, including periods of recruitment, exposure, follow-up, and data collection                                                                                                                                                                                                        | 5             |
| Participants                 | 6       | (a) Give the eligibility criteria, and the sources and methods of selection of participants. Describe methods of follow-up<br><br>(b) For matched studies, give matching criteria and number of exposed and unexposed                                                                                                                  | 5             |
| Variables                    | 7       | Clearly define all outcomes, exposures, predictors, potential confounders, and effect modifiers. Give diagnostic criteria, if applicable                                                                                                                                                                                               | 5-7           |
| Data sources/<br>measurement | 8*      | For each variable of interest, give sources of data and details of methods of assessment (measurement). Describe comparability of assessment methods if there is more than one group                                                                                                                                                   | 5-7           |
| Bias                         | 9       | Describe any efforts to address potential sources of bias                                                                                                                                                                                                                                                                              | 7             |
| Study size                   | 10      | Explain how the study size was arrived at                                                                                                                                                                                                                                                                                              | NA            |
| Quantitative variables       | 11      | Explain how quantitative variables were handled in the analyses. If applicable, describe which groupings were chosen and why                                                                                                                                                                                                           | 7             |
| Statistical methods          | 12      | (a) Describe all statistical methods, including those used to control for confounding<br><br>(b) Describe any methods used to examine subgroups and interactions<br><br>(c) Explain how missing data were addressed<br><br>(d) If applicable, explain how loss to follow-up was addressed<br><br>(e) Describe any sensitivity analyses | 7             |
| <b>Results</b>               |         |                                                                                                                                                                                                                                                                                                                                        |               |
| Participants                 | 13*     | (a) Report numbers of individuals at each stage of study—eg numbers potentially eligible, examined for eligibility, confirmed eligible, included in the study, completing follow-up, and analysed                                                                                                                                      | 8<br><br>Fig2 |

|                          |     |                                                                                                                                                                                                                                                                                                                                                                                                                       |       |
|--------------------------|-----|-----------------------------------------------------------------------------------------------------------------------------------------------------------------------------------------------------------------------------------------------------------------------------------------------------------------------------------------------------------------------------------------------------------------------|-------|
|                          |     | (b) Give reasons for non-participation at each stage                                                                                                                                                                                                                                                                                                                                                                  |       |
|                          |     | (c) Consider use of a flow diagram                                                                                                                                                                                                                                                                                                                                                                                    |       |
| Descriptive data         | 14* | (a) Give characteristics of study participants (eg demographic, clinical, social) and information on exposures and potential confounders<br><br>(b) Indicate number of participants with missing data for each variable of interest<br><br>(c) Summarise follow-up time (eg, average and total amount)                                                                                                                | 8     |
| Outcome data             | 15* | Report numbers of outcome events or summary measures over time                                                                                                                                                                                                                                                                                                                                                        | 8     |
| Main results             | 16  | (a) Give unadjusted estimates and, if applicable, confounder-adjusted estimates and their precision (eg, 95% confidence interval). Make clear which confounders were adjusted for and why they were included<br><br>(b) Report category boundaries when continuous variables were categorized<br><br>(c) If relevant, consider translating estimates of relative risk into absolute risk for a meaningful time period | 8-9   |
| Other analyses           | 17  | Report other analyses done—eg analyses of subgroups and interactions, and sensitivity analyses                                                                                                                                                                                                                                                                                                                        | 8-9   |
| <b>Discussion</b>        |     |                                                                                                                                                                                                                                                                                                                                                                                                                       |       |
| Key results              | 18  | Summarise key results with reference to study objectives                                                                                                                                                                                                                                                                                                                                                              | 11    |
| Limitations              | 19  | Discuss limitations of the study, taking into account sources of potential bias or imprecision. Discuss both direction and magnitude of any potential bias                                                                                                                                                                                                                                                            | 13-14 |
| Interpretation           | 20  | Give a cautious overall interpretation of results considering objectives, limitations, multiplicity of analyses, results from similar studies, and other relevant evidence                                                                                                                                                                                                                                            | 14    |
| Generalisability         | 21  | Discuss the generalisability (external validity) of the study results                                                                                                                                                                                                                                                                                                                                                 | 14    |
| <b>Other information</b> |     |                                                                                                                                                                                                                                                                                                                                                                                                                       |       |
| Funding                  | 22  | Give the source of funding and the role of the funders for the present study and, if applicable, for the original study on which the present article is based                                                                                                                                                                                                                                                         | 15    |

\*Give information separately for exposed and unexposed groups.

**Note:** An Explanation and Elaboration article discusses each checklist item and gives methodological background and published examples of transparent reporting. The STROBE checklist is best used in conjunction with this article (freely available on the Web sites of PLoS Medicine at <http://www.plosmedicine.org/>, Annals of Internal Medicine at <http://www.annals.org/>, and Epidemiology at <http://www.epidem.com/>). Information on the STROBE Initiative is available at <http://www.strobe-statement.org>.

# BMJ Open

## Life after COVID-19 the road from intensive care back to living: a prospective cohort study

|                                 |                                                                                                                                                                                                                                                                                                                                                                                                                                                                                                                                                                                                                                                                                                                                                                                                                                                      |
|---------------------------------|------------------------------------------------------------------------------------------------------------------------------------------------------------------------------------------------------------------------------------------------------------------------------------------------------------------------------------------------------------------------------------------------------------------------------------------------------------------------------------------------------------------------------------------------------------------------------------------------------------------------------------------------------------------------------------------------------------------------------------------------------------------------------------------------------------------------------------------------------|
| Journal:                        | <i>BMJ Open</i>                                                                                                                                                                                                                                                                                                                                                                                                                                                                                                                                                                                                                                                                                                                                                                                                                                      |
| Manuscript ID                   | bmjopen-2022-062332.R1                                                                                                                                                                                                                                                                                                                                                                                                                                                                                                                                                                                                                                                                                                                                                                                                                               |
| Article Type:                   | Original research                                                                                                                                                                                                                                                                                                                                                                                                                                                                                                                                                                                                                                                                                                                                                                                                                                    |
| Date Submitted by the Author:   | 16-Jul-2022                                                                                                                                                                                                                                                                                                                                                                                                                                                                                                                                                                                                                                                                                                                                                                                                                                          |
| Complete List of Authors:       | Wiertz, Carolina; Adelante, Rehabilitation medicine; Maastricht University, Department of Rehabilitation Medicine Research School CAPHRI<br>Hemmen, Bena; Adelante, Rehabilitation medicine; Maastricht University, Department of Rehabilitation Medicine Research School CAPHRI<br>Sep, Simone JS; Adelante, Rehabilitation medicine; Maastricht University, Department of Rehabilitation Medicine Research School CAPHRI<br>van Santen, Susanne; Maastricht Universitair Medisch Centrum+, Department of Intensive Care<br>van Horn, Yvette; Adelante, Rehabilitation medicine<br>van Kuijk, Sander; Maastricht Universitair Medisch Centrum+, Clinical Epidemiology and Medical Technology Assessment<br>Verbunt, Jeanine; Adelante, Rehabilitation medicine; Maastricht University, Department of Rehabilitation Medicine Research School CAPHRI |
| <b>Primary Subject Heading</b>: | Rehabilitation medicine                                                                                                                                                                                                                                                                                                                                                                                                                                                                                                                                                                                                                                                                                                                                                                                                                              |
| Secondary Subject Heading:      | Intensive care                                                                                                                                                                                                                                                                                                                                                                                                                                                                                                                                                                                                                                                                                                                                                                                                                                       |
| Keywords:                       | COVID-19, REHABILITATION MEDICINE, Adult intensive & critical care < INTENSIVE & CRITICAL CARE                                                                                                                                                                                                                                                                                                                                                                                                                                                                                                                                                                                                                                                                                                                                                       |
|                                 |                                                                                                                                                                                                                                                                                                                                                                                                                                                                                                                                                                                                                                                                                                                                                                                                                                                      |

SCHOLARONE™  
Manuscripts

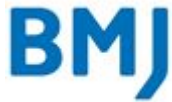

I, the Submitting Author has the right to grant and does grant on behalf of all authors of the Work (as defined in the below author licence), an exclusive licence and/or a non-exclusive licence for contributions from authors who are: i) UK Crown employees; ii) where BMJ has agreed a CC-BY licence shall apply, and/or iii) in accordance with the terms applicable for US Federal Government officers or employees acting as part of their official duties; on a worldwide, perpetual, irrevocable, royalty-free basis to BMJ Publishing Group Ltd ("BMJ") its licensees and where the relevant Journal is co-owned by BMJ to the co-owners of the Journal, to publish the Work in this journal and any other BMJ products and to exploit all rights, as set out in our [licence](#).

The Submitting Author accepts and understands that any supply made under these terms is made by BMJ to the Submitting Author unless you are acting as an employee on behalf of your employer or a postgraduate student of an affiliated institution which is paying any applicable article publishing charge ("APC") for Open Access articles. Where the Submitting Author wishes to make the Work available on an Open Access basis (and intends to pay the relevant APC), the terms of reuse of such Open Access shall be governed by a Creative Commons licence – details of these licences and which [Creative Commons](#) licence will apply to this Work are set out in our licence referred to above.

Other than as permitted in any relevant BMJ Author's Self Archiving Policies, I confirm this Work has not been accepted for publication elsewhere, is not being considered for publication elsewhere and does not duplicate material already published. I confirm all authors consent to publication of this Work and authorise the granting of this licence.



1  
2  
3 **Life after COVID-19 the road from intensive care back to living: a prospective cohort study**  
4

5  
6  
7  
8 **Author's names**

9  
10 Carolina MH Wiertz MD<sup>1,2</sup>, Bena Hemmen MD PhD<sup>1,2</sup>, Simone JS Sep PhD<sup>1,2</sup>, Susanne van Santen MD<sup>3</sup>,  
11  
12 Yvette Y van Horn MD<sup>1</sup>, Sander MJ van Kuijk<sup>4</sup>, Jeanine A Verbunt MD PhD<sup>1,2</sup>  
13

14  
15  
16  
17 **Affiliation of authors**

18 <sup>1</sup> Adelante Zorggroep, P.O. Box 88, 6430 AB Hoensbroek, The Netherlands.

19  
20  
21 <sup>2</sup> Department of Rehabilitation Medicine Research School CAPHRI, Maastricht University, P.O.  
22  
23 Box 616, 6200 MD Maastricht, The Netherlands.

24  
25  
26 <sup>3</sup> Department of Intensive Care Medicine, Maastricht University Medical Centre, 6202 AZ  
27  
28 Maastricht, The Netherlands.

29  
30  
31 <sup>4</sup> Department of Clinical Epidemiology and Medical Technology Assessment, Maastricht  
32  
33 University Medical Centre, 6202 AZ Maastricht, The Netherlands.

34  
35  
36  
37 **Corresponding author: Carolina Wiertz**

38  
39 Adelante Zorggroep

40  
41 P.O. Box 88

42  
43 6430 AB Hoensbroek

44  
45 The Netherlands

46  
47 E-mail: c.wiertz@adelante-zorggroep.nl  
48  
49  
50  
51  
52  
53  
54  
55  
56  
57  
58  
59  
60

1  
2  
3 **Life after COVID-19 the road from intensive care back to living: a prospective cohort study**  
4  
5

6 **Abstract**  
7  
8

9 **Objectives:** The aim of the study was to evaluate recovery of participation in post-COVID-19 patients  
10 during the first year after ICU discharge. The secondary aim was to identify the early determinants  
11 associated with recovery of participation.  
12  
13  
14

15  
16 **Design:** Prospective cohort study.  
17  
18

19 **Setting:** COVID-19 post-ICU inpatient rehabilitation in the Netherlands, during the first epidemic wave  
20 between April - July 2020, with one-year follow-up.  
21  
22  
23

24 **Participants:** COVID-19 ICU survivors  $\geq 18$  years of age needing inpatient rehabilitation.  
25  
26

27 **Main outcome measures:** Participation in society was assessed by the 'Utrecht Scale for Evaluation of  
28 Rehabilitation-Participation (USER-P) restrictions scale'. Secondary measures of body function  
29 impairments (muscle force, pulmonary function, fatigue (MFI), breathlessness (MRC), pain (NRS)),  
30 activity limitations (6MWT, PROMIS 8b), personal factors (coping (UPCC), Anxiety and depression  
31 (HADS), post traumatic stress (GPS-PTSD-5), cognitive functioning (CLC-IC)) and social factors were  
32 used. Statistical analyses: linear mixed-effects model, with recovery of participation levels as  
33 dependent variable. Patient characteristics in domains of body function, activity limitations, personal  
34 and social factors were added as independent variables  
35  
36  
37  
38  
39  
40  
41  
42  
43  
44

45 **Results:** This study included 67 COVID-19 ICU survivors (mean age 62y, 78% male). Mean USER-P  
46 restrictions scores increased over time; mean participation levels increasing from 62.0, 76.5 to 86.1 at  
47 one, three and 12 months respectively. After one year, 50% had not fully resumed work and  
48 restrictions were reported in physical exercise (51%), household duties (46%), and leisure activities  
49 (29%). Self-reported complaints of breathlessness and fatigue, more perceived limitations in daily life,  
50 as well as personal factors (less pro-active coping style and anxiety/depression complaints) were  
51 associated with delayed recovery of participation (all p-value < 0.05).  
52  
53  
54  
55  
56  
57  
58  
59  
60

1  
2  
3 47 **Conclusions:** This study supports the view that an integral vision of health is important when looking  
4  
5 48 at the long-term consequence of post-IC COVID-19. Personal factors such as having a less proactive  
6  
7 49 coping style or mental impairments early on contribute to delayed recovery.  
8  
9

10  
11 50

12  
13 51 **Keywords:** COVID-19, Critical care, Rehabilitation medicine  
14  
15

16  
17 52

18  
19 53 **Strengths and limitations of this study**

- 20  
21 54 - This study only included the most severely affected post-ICU COVID-19 patients referred to  
22  
23 55 inpatient rehabilitation.  
24  
25  
26 56 - This study used physical examination as well as questionnaires, which means that there was a  
27  
28 57 combination of objective and subjective measurements.  
29  
30 58 - Although the sample size is small, a large number of factors were studied for their effect on  
31  
32 59 the course of participation recovery.  
33  
34  
35 60 - Twenty-three patients were not approached in time for consent to participate.  
36  
37 61 - The lockdown and the inability to perform social and outdoor activities may have affected the  
38  
39 62 total USER-P score.  
40

41  
42 63

43  
44 64 Word count abstract: 300  
45

46  
47 65 Word count main text: 3370  
48

49  
50 66 Number of figures and tables: 6  
51

52  
53 67  
54  
55  
56  
57  
58  
59  
60

## 68 Introduction

69 In the first wave of the coronavirus disease 2019 (COVID-19) pandemic in the Netherlands about 2%  
70 of all confirmed cases needed treatment in an intensive care unit (ICU) (1,2). About three-quarters of  
71 those admitted to ICU had acute respiratory distress syndrome (3) and many patients were recorded  
72 as having shock, acute kidney injury, thrombotic complications and/or cardiac injury (3).

73 Survivors of critical illness frequently experience new or worsening physical, cognitive and/or mental  
74 impairment, described as post intensive care syndrome (PICS) (4), which can have long-term effects on  
75 participation and quality of life (5–7). Immediately after ICU admission, COVID-19 patients display  
76 various physical impairments such as exertional hypoxemia, reduced overall muscle force, shoulder  
77 problems, dysphagia, and anxiety complaints (8). In the subacute phase (one to three months after ICU  
78 discharge) 90% of the post-ICU COVID patients still experience symptoms affecting at least one of the  
79 PICS domains (9,10). Due to the varying impact of severe COVID-19, patients may experience  
80 limitations in their participation in daily living, social functioning or work performance (11,12).  
81 Restrictions in participation may eventually lead to an increase in (healthcare) costs, since patients  
82 need for example more professional assistance in their ADL or return to work is delayed. Although  
83 impairments in various domains of functioning have been identified, any long-term effects on the  
84 recovery of participation are unclear. The effect that this new disease may have on participation,  
85 combined with the large number of COVID-19 ICU survivors, points to the need to study factors that  
86 could delay the recovery in participation of survivors after ICU discharge. Consequently, the present  
87 study aimed to evaluate the recovery of participation during the first year after ICU discharge in post-  
88 COVID-19 patients. The secondary aim was to identify early determinants associated with recovery of  
89 participation.

90

91

## 92 **Methods**

### 93 Study design and participants

94 This prospective cohort study was performed at Adelante Zorggroep, a rehabilitation centre in the  
95 South of the Netherlands. Patients with an indication for inpatient multidisciplinary rehabilitation were  
96 transferred to the rehabilitation centre. The indication was determined in the hospital by a consultant  
97 in rehabilitation medicine, based on their clinical judgement of the severity of physical, mental and/or  
98 cognitive impairments (13,14). All patients (aged 18 or older) referred for inpatient rehabilitation after  
99 ICU discharge for COVID-19 were eligible to participate in the study. The exclusion criterion was not  
100 speaking or reading the Dutch language fluently. All patients received inpatient multidisciplinary  
101 rehabilitation treatment including physiotherapy, occupational therapy, speechtherapy and  
102 psychology personalized to patient's limitations and needs according to the Dutch guideline for post-  
103 COVID ICU rehabilitation (13,15). All participants provided written informed consent. Patients were  
104 transferred to the rehabilitation centre from 7 (2 academic and 5 regional) hospitals in the region.  
105 COVID-19 was confirmed with a SARS-COV-19 positive PCR test. The local medical ethics committee  
106 Zuyderland METC (METCZ20200086) approved the study.

107 Patient and public involvement: Patients and/or the public were not involved in the design, or conduct,  
108 or reporting, or dissemination plans of this research.

109

### 110 Data collection

111 Data was collected in the form of baseline information at admission to the rehabilitation centre (T0),  
112 through physical examination and self-administered questionnaires after one (T1), three (T2) and  
113 twelve months (T3). Since different domains of functioning can be affected by COVID-19,  
114 measurements were chosen based on an integral vision of health and included body function  
115 impairments, activity limitations and participation restrictions as well as personal and social factors.  
116 These factors are derived as main domains in the International Classification of Functioning, Disability

1  
2  
3 117 and Health (ICF) that supports the classification of health and health-related conditions and their effect  
4  
5 118 on social participation (Figure 1) (14).

6  
7  
8 119 Primary outcome variable: Participation in society was assessed by the 'Utrecht Scale for Evaluation of  
9  
10 120 Rehabilitation-Participation (USER-P) restriction subscale'. This subscale consists of 11 items on  
11  
12 121 restrictions in vocational, leisure and social activities. Items are rated from 0 'not possible' to 3 'without  
13  
14 122 difficulty' and a 'not applicable' option. The total score ranges from 0 to 100, higher scores indicating  
15  
16 123 fewer restrictions in participation (16,17).

17  
18  
19  
20 124 Data on age, sex, comorbidities and parameters related to critical illness were collected from the  
21  
22 125 medical transfer letters (T0). Comorbidities were classed into diabetes mellitus, hypertension,  
23  
24 126 cardiovascular disease, lung disease and psychiatric disorders. Parameters related to severity of the  
25  
26 127 critical illness were length of ICU stay, invasive mechanical ventilation (IMV) (yes/no) and duration of  
27  
28 128 invasive IMV. The duration of the inpatient rehabilitation was recorded.

29  
30  
31  
32 129 Physical examination: Assessment of muscle strength, functional exercise capacity and pulmonary  
33  
34 130 function were part of physical examination. To measure muscle strength, a handheld dynamometer  
35  
36 131 (HHD) was used (18) to assess the following muscle groups: shoulder abduction, elbow flexion, wrist  
37  
38 132 extension, hip flexion and knee extension, all on patient's dominant side. HHD values were measured  
39  
40 133 in Newtons and percentages of the norm compared with healthy persons of the same sex, age, and  
41  
42 134 weight (19,20). Severe muscle weakness was defined as <80% of the norm score. For the clinical  
43  
44 135 assessment of the functional exercise capacity, the 6-minute walk test (6-MWT) was used, displayed  
45  
46 136 in meters and percentage of the norm (21,22). To evaluate pulmonary function Quark PFT spirometry  
47  
48 137 (Cosmed, Italy) was used (23). Forced expiratory volume in the first second ( $FEV_1$ ), forced vital capacity  
49  
50 138 (FVC) and  $FEV_1/FVC$  ratio were included in the analysis, displayed in percentage of the norm.

51  
52  
53  
54  
55 139 In addition, self-administered questionnaires were used. Breathlessness was assessed by the MRC  
56  
57 140 breathlessness scale, which comprises five statements that range from 0 'no trouble with  
58  
59 141 breathlessness' to 5 'I am too breathless to leave the house' (24). The Numerical Rating Scale (NRS)

1  
2  
3 142 was used for assessing pain. Patients were asked to rate their mean pain intensities in the last seven  
4  
5 143 days, ranging from 0-10, with 0 indicating 'no pain' and 10 indicating 'the worst imaginable pain' (25).  
6  
7 144 The multidimensional Fatigue Inventory (MFI) is a 20-item metric for fatigue severity. It has 5  
8  
9 145 dimensions: general fatigue, physical fatigue, mental fatigue, reduced motivation and reduced activity.  
10  
11 146 Each item ranges from 1 'absence of fatigue' to 5 'severe fatigue'. A total score is calculated as the sum  
12  
13 147 of the subscale scores (20–100). Higher scores indicate higher levels of fatigue (26). The perceived  
14  
15 148 limitations in daily life were assessed using the PROMIS physical function shortform 8b. This survey  
16  
17 149 contains eight questions ranging from 1 'unable to do' to 5 'without any difficulty' (27). A web-based  
18  
19 150 scoring service was used to calculate T-scores (maximum score 60.1 and mean 50.0, corresponding to  
20  
21 151 the mean in the general population of the USA), whereas a higher scores indicates better physical  
22  
23 152 function (28). Anxiety and depression complaints were assessed with the Hospital Anxiety and  
24  
25 153 Depression Scale (HADS). A score  $\geq 8$  on either subscale was considered to be substantial anxiety or  
26  
27 154 depression symptoms (29). Post-traumatic stress was assessed using the Global Psychotrauma Screen  
28  
29 155 – Post Traumatic Stress Disorder (GPS-PTSD-5). The regular GPS consists of 22 items, item 1-5 can be  
30  
31 156 used to generate a GPS-PTSD-5 score (range 0-5), score  $\geq 3$  indicates PTSD (30). Cognitive functioning  
32  
33 157 was assessed using the Checklist for Cognitive consequences after ICU-admission (CLC-IC). The CLC-IC  
34  
35 158 consists of 10 items; higher scores indicate more cognitive problems experienced in daily life (range 0-  
36  
37 159 10). The CLC-IC is based on the CLCE-24 (31). Proactive coping skills were assessed at T3 with the  
38  
39 160 Utrecht Proactive Coping Scale (UPCC), which is a 21-item questionnaire scored on a 4-point scale  
40  
41 161 ranging from 'not competent at all' to 'competent'. The total score was the average for all item scores  
42  
43 162 (range 1–4), where higher scores indicate higher levels of proactive coping (32). Premorbid social- and  
44  
45 163 work situations were collected at T1.

#### 164 Statistical analyses

165 Results are reported as mean and standard deviation (SD) or median and interquartile range (IQR)  
166 depending on distribution. Recovery of participation levels over time were assessed with linear mixed-

1  
2  
3 167 effects model for repeated measures. Patient characteristics in the domains body function, activity  
4  
5 168 limitations, personal and social factors at T0 and and 1 month after admission in the rehabilitation  
6  
7 169 centre (T1) were added to separate models that also included time and the interaction between that  
8  
9  
10 170 covariate and time. Next, for illustrative purposes only, linear mixed-effects model analyses were  
11  
12 171 stratified according to patient characteristics that were significantly associated with the course of  
13  
14 172 recovery of participation levels to visualize different patterns of change over time. A  $p < 0.05$  was  
15  
16 173 considered as statistically significant. Statistical analyses were performed with IBM SPSS statistics 26.0  
17  
18 174 (SPSS Inc. Chicago, IL).

175

## 176 **Results**

177 During the first COVID-19 wave between April 2 and June 30, 2020, 103 post-ICU patients were  
178 admitted for inpatient rehabilitation. Of these, twenty-three patients were missed since this study was  
179 part of clinical practice in a very dynamic period and 13 patients were excluded excluded for reasons  
180 given in figure 2. The study sample consisted of 67 patients (78% male) with a median age of 62 (IQR  
181 57-68) and a median length of stay of 20 (12-33) days in the ICU and 19 (11-31) days inpatient  
182 rehabilitation (Table 1). Overall, an improvement in muscle strength and functional exercise capacity  
183 (6MWT) was found, whereas fatigue complaints and perceived limitations in daily life seem to decrease  
184 in the first year after ICU discharge (Table 1).

185 Participation restrictions improved in the first year after ICU discharge due to a COVID-19 infection  
186 (Figure 3). Mean participation levels increased from 62.0 (95%CI 55.9-68.1), 76.5 (95%CI 71.9-81.1) to  
187 86.1 (95%CI 80.6-91.6) at one, three and 12 months respectively. One year after ICU discharge, 50.8%  
188 of the patients still reported restrictions in physical exercise, 45.8% in performing housekeeping and  
189 28.8% in performing leisure activities. After one year work is not applicable in 42.4% of all patients,  
190 which is comparable to the premorbid work situation, where 58% of all patients were employed. One  
191 year after ICU discharge 28.8% of all patients still reported restrictions in work/education. Taking into



192 account the patients who were not working pre-illness, means that 50% of the pre-illness working  
 193 patients had not fully resumed work after one year (Table 1).

| Table 1                                                            | T0           | One month (T1)  | Three months (T2) | Twelve months (T3) |
|--------------------------------------------------------------------|--------------|-----------------|-------------------|--------------------|
| <b>Baseline characteristics</b>                                    |              |                 |                   |                    |
| Age, years; n=67; median (IQR)                                     | 62 (57 – 68) | -               |                   |                    |
| <b>Sex; n=67; No (%)</b>                                           |              |                 |                   |                    |
| - Men                                                              | 52 (77.6%)   | -               |                   |                    |
| - Women                                                            | 15 (22.5%)   | -               |                   |                    |
| <b>Highest level of education; n=62; No (%)</b>                    |              |                 |                   |                    |
| - Lower education                                                  | 42 (67.7%)   | -               |                   |                    |
| - Higher education                                                 | 20 (32.3%)   | -               |                   |                    |
| <b>Work situation; n=62; No (%)</b>                                |              |                 |                   |                    |
| - Full-time job                                                    | 26 (41.9%)   | -               |                   |                    |
| - Parttime job                                                     | 10 (16.1%)   | -               |                   |                    |
| - Retired                                                          | 18 (29.0%)   | -               |                   |                    |
| - Not working otherwise                                            | 8 (12.9%)    | -               |                   |                    |
| <b>Comorbidities; n=67; no (%)</b>                                 |              |                 |                   |                    |
| - Asthma / bronchitis                                              | 6 (9.0%)     | -               |                   |                    |
| - Chronic obstructive pulmonary disease                            | 4 (6.0%)     | -               |                   |                    |
| - Obstructive sleep apnoea syndrome                                | 12 (17.9%)   | -               |                   |                    |
| - Diabetes Mellitus                                                | 12 (17.9%)   | -               |                   |                    |
| - Hypertension                                                     | 23 (34.3%)   | -               |                   |                    |
| - Cardiovascular disease                                           | 21 (31.3%)   | -               |                   |                    |
| - Chronic kidney disease                                           | 5 (7.4%)     | -               |                   |                    |
| - Depression                                                       | 4 (6.0%)     | -               |                   |                    |
| - None of the above comorbidities                                  | 25 (37.3%)   | -               |                   |                    |
| <b>Parameters related to severity critical illness</b>             |              |                 |                   |                    |
| - Duration intensive care unit, in days; n=59; median (IQR)        | 20 (12 – 33) | -               |                   |                    |
| - Invasive mechanical ventilation; n=67; No (%)                    | 58 (86.6%)   | -               |                   |                    |
| - Duration IMV, in days; n=55; median (IQR)                        | 17 (9 – 24)  | -               |                   |                    |
| - Presence of ICU-acquired weakness, n=61; No (%)                  | 45 (73.8%)   | -               |                   |                    |
| <b>Duration inpatient rehabilitation, days; n=67; median (IQR)</b> | 19 (11 – 31) |                 |                   |                    |
| <b>Coping style (UPCC); n=58; mean (SD)</b>                        | 3.0 (0.2)    |                 |                   |                    |
| <b>USER-P restriction subscale <sup>a</sup></b>                    |              |                 |                   |                    |
| - Work/education                                                   | -            | 64.4%           | 60.6%             | 28.8%              |
| - Housekeeping                                                     | -            | 74.6%           | 65.2%             | 45.8%              |
| - Mobility                                                         | -            | 59.3%           | 43.9%             | 16.9%              |
| - Physical exercise                                                | -            | 79.7%           | 60.6%             | 50.8%              |
| - Going out                                                        | -            | 45.8%           | 24.2%             | 10.2%              |
| - Outdoor activities                                               | -            | 54.2%           | 36.4%             | 16.9%              |
| - Leisure activities                                               | -            | 42.4%           | 28.8%             | 20.3%              |
| - Partner relationship                                             | -            | 28.8%           | 24.2%             | 16.9%              |
| - Visits to family/friends                                         | -            | 45.8%           | 31.8%             | 10.2%              |
| - Visits from family/friend                                        | -            | 32.2%           | 13.6%             | 8.5%               |
| - Telephone/PC contact                                             | -            | 15.3%           | 13.6%             | 11.9%              |
| <b>Physical examination:</b>                                       |              |                 |                   |                    |
| - Muscle strength                                                  |              |                 |                   |                    |
| - Mean muscle force (HHD), mean (SD)                               | -            | 75.7% (15.3)    | 93.5% (24.6)      | 101.4% (15.3)      |
| - 6MWT; mean (SD)                                                  | -            | 467.8m (91.2)   | 518.3m (102.5)    | 531.0m (86.5)      |
| - percentage of predicted                                          | -            | 69.5% (13.7)    | 76.9% (13.7)      | 79.2% (10.4)       |
| - Pulmonary function; mean (SD)                                    | -            |                 |                   |                    |
| - FEV1                                                             | -            | 87.5% (15.8)    | 93.8% (19.9)      | 93.6% (17.7)       |
| - FVC                                                              | -            | 85.9% (16.3)    | 92.8% (18.7)      | 92.2% (15.6)       |
| - FEV1/FVC ratio                                                   | -            | 79.6% (9.1)     | 77.3% (10.6)      | 79.1% (11.2)       |
| <b>Self-administered questionnaires:</b>                           |              |                 |                   |                    |
| - Breathlessness (MRC); median (IQR)                               | -            | 2.0 (1.0 – 3.0) | 1.0 (1.0 – 2.0)   | 1.0 (1.0 – 2.0)    |
| - Pain (NRS); median (IQR)                                         | -            | 2.0 (1.0 - 3.5) | 2.0 (1.5 – 5.0)   | 2.0 (1.0 – 3.0)    |
| - Fatigue (MFI); mean (SD)                                         | -            | 58.6 (14.0)     | 56.0 (15.3)       | 50.8 (17.6)        |
| - perceived limitations in daily life (PROMIS 8b); mean (SD)       | -            | 34.8 (7.4)      | 39.2 (6.9)        | 44.8 (8.0)         |
| - Anxiety (HADS-anxiety); median (IQR)                             | -            | 3.0 (1.0 – 5.0) | 3.0 (1.0 - 6.0)   | 2.0 (0.5 – 6.0)    |
| - Exceeded anxiety cut-off ≥8                                      | -            | 7/57 (12.3%)    | 11/66 (16.7%)     | 10/59 (16.9%)      |
| - Depression (HADS depression); median (IQR)                       | -            | 2.0 (1.5 – 6.0) | 3.0 (1.0 – 6.0)   | 2.0 (1.0 – 4.0)    |
| - Exceeded depression cut-off ≥8                                   | -            | 10/59 (16.9%)   | 13/66 (19.7%)     | 10/59 (16.9%)      |
| - Post-traumatic stress (GPS-PTSD-5); median (IQR)                 | -            | 0.0 (0.0 – 1.0) | 0.0 (0.0 – 1.0)   | 0.0 (0.0 – 1.0)    |
| - Exceeded PTSD cut-off ≥3                                         | -            | 5/59 (8.5%)     | 8/66 (12.1%)      | 3/59 (5.1%)        |
| - Cognitive impairments (CLC-IC); median (IQR)                     | -            | 3.0 (1.0 – 6.0) | 4.0 (1.0 – 7.0)   | 2.0 (0.0 – 7.0)    |

1  
2  
3 194 Table 1, overview of the baseline characteristics (T0) and the physical examination and self-administered questionnaires at T1, T2 and T3. Low educational level  
4 195 was determined as 'primary and secondary education and post-secondary school'. High educational level was determined as 'bachelor's degree, master's degree  
5 196 or doctorate or equivalent'. Abbreviations: IMV, Invasive mechanical ventilation; UPCC, Utrecht Proactive Coping Scale; USER-P, Utrecht Scale for Evaluation of  
6 197 Rehabilitation-Participation; HHD, handheld dynamometer; 6MWT, 6 minute walking test; FEV1, Forced expiratory volume in the first second; FVC, Forced vital  
7 198 capacity; n.a., not applicable; MFI, multidimensional Fatigue Inventory; HADS, Hospital Anxiety and Depression Scale; GPS, The Global Psychotrauma Screen; CLC-  
8 199 IC, Checklist for Cognitive consequences after an ICU-admission. \* Restriction items values are percentages of patients who are restricted or dissatisfied.

9 200  
10 201 Regarding the second aim, in the ICF domain body functions, breathlessness (MRC breathlessness),  
11 202 regression coefficient: 0.60 (95%CI 0.23-0.97; p-value <0.01) and fatigue (MFI), regression coefficient:  
12 203 0.07 (95%CI 0.03-0.09; p-value <0.01) were the only physical variables that influenced participation  
13 204 recovery over time. For the ICF domain activities, perceived limitations in daily life (PROMIS 8b)  
14 205 showed a different pattern in the recovery of participation restriction levels, regression coefficient: -  
15 206 0.11 (95%CI -0.12 to -0.05; p-value <0.01). In addition, personal factors like coping style (UPCC)  
16 207 regression coefficient: -2.39 (95%CI -4.20 to -0.06; p-value 0.01), anxiety (HADS anxiety) regression  
17 208 coefficient: 0.17 (95%CI 0.02-0.31; p-value 0.03) and depression (HADS depression) regression  
18 209 coefficient: 0.19 (95%CI 0.07-0.31; p-value <0.01) showed different paths in resuming the level of  
19 210 participation over time. Other early determinants show no significant difference in the recovery of  
20 211 participation (Table 2).

21 212  
22  
23  
24  
25  
26  
27  
28  
29  
30  
31  
32  
33  
34  
35  
36  
37  
38  
39  
40  
41  
42  
43  
44  
45  
46  
47  
48  
49  
50  
51  
52  
53  
54  
55  
56  
57  
58  
59  
60

213

| Table 2                                         | Estimate (95% CI)     | p-value |
|-------------------------------------------------|-----------------------|---------|
| <b>Baseline characteristics</b>                 |                       |         |
| Age                                             | -0.03 (-0.08 – 0.02)  | 0.29    |
| Sex                                             | 0.72 (-0.32 – 1.76)   | 0.17    |
| Number of comorbidities                         | 0.04 (-0.34 – 0.42)   | 0.83    |
| Duration of inpatient rehabilitation            | 0.03 (-0.00 – 0.06)   | 0.07    |
| Coping style (UPCC)                             | -2.39 (-4.20 – -0.06) | 0.01*   |
| <b>ICU-stay specific parameters</b>             |                       |         |
| Length of ICU stay                              | 0.02 (-0.01 – 0.06)   | 0.21    |
| Duration of invasive mechanical ventilation     | 0.02 (-0.02 – 0.05)   | 0.37    |
| ICU-acquired weakness                           | -0.23 (-1.31 – 0.85)  | 0.67    |
| <b>Physical examination</b>                     |                       |         |
| Muscle strength                                 |                       |         |
| - Mean muscle force (HHD)                       | -0.02 (-0.06 – 0.01)  | 0.18    |
| 6MWT                                            | -0.00 (-0.01 – 0.01)  | 0.65    |
| Pulmonary function                              |                       |         |
| - FEV1                                          | -0.02 (-0.06 – 0.01)  | 0.16    |
| - FVC                                           | -0.03 (-0.06 – 0.00)  | 0.07    |
| - FEV1/FVC ratio                                | 0.04 (-0.02 – 0.09)   | 0.24    |
| <b>Self-administered questionnaires</b>         |                       |         |
| Breathlessness (MRC)                            | 0.60 (0.23 – 0.97)    | < 0.01* |
| Pain (NRS)                                      | -0.03 (-0.28 – 0.23)  | 0.84    |
| Fatigue (MFI)                                   | 0.07 (0.03 – 0.09)    | < 0.01* |
| Perceived limitations in daily life (PROMIS 8b) | -0.11 (-0.12 – -0.05) | < 0.01* |
| Anxiety (HADS-anxiety)                          | 0.17 (0.02 – 0.31)    | 0.03*   |
| Depression (HADS depression)                    | 0.19 (0.07 – 0.31)    | < 0.01* |
| Post-traumatic stress (GPS-PTSD-5)              | 0.24 (-0.21 – 0.70)   | 0.30    |
| Cognitive impairments (CLC-IC)                  | 0.09 (-0.07 – 0.24)   | 0.27    |

Table 2; linear mixed model for covariates at T0 or T1, as an interaction between covariate and time (1, 3, and 12 months), for the recovery of participation levels. \* p < 0.05. Abbreviations: UPCC, Utrecht Proactive Coping Scale; HHD, handheld dynamometer; 6MWT, 6 minute walking test; FEV1, Forced expiratory volume in the first second; FVC, Forced vital capacity; MFI, multidimensional Fatigue Inventory; HADS, Hospital Anxiety and Depression Scale; GPS, The Global Psychotrauma Screen; CLC-IC, Checklist for Cognitive consequences after an ICU-admission.

219

220

221 Participation levels increased significantly between 1 and 3 months and between 3 and 12 months in  
 222 patients who reported more breathlessness, more fatigue or more limitations in daily life and those  
 223 with a passive coping style. In contrast, patients with less breathlessness, fewer fatigue complaints,  
 224 fewer restrictions in daily life and a pro-active coping style showed no significant increase between 3  
 225 and 12 months (Figure 4). For patients with HADS anxiety score  $\geq 8$ , no differences were found in  
 226 participation levels in the first 3 months, while there was significant difference in recovery of  
 227 participation levels between 3 and 12 months. However, for patients with fewer anxiety complaints  
 228 (HADS anxiety score  $\leq 8$ ) participation levels significantly improved between 1 and 3 months and

1  
2  
3 229 between 3 and 12 months. For depressive symptoms, both groups improved significantly in  
4  
5 230 participation levels between 1 to 3 months and between 3 to 12 months, although a steeper curve is  
6  
7 231 seen in recovery of participation levels at 3 to 12 months in patients with more depressive symptoms.  
8  
9

10 232

11 233

12 234 **Discussion**

13  
14  
15 235 In this prospective cohort study, recovery of participation during the first year after ICU discharge in  
16  
17 236 COVID-19 ICU survivors who needed inpatient rehabilitation was evaluated and the association  
18  
19 237 between early levels of body function impairments, activity limitations and personal and social factors  
20  
21 238 on recovery were estimated. It is seen that in the first year after ICU discharge patients were able to  
22  
23 239 improve their participation levels. Nevertheless, after one year, there are still important limitations in  
24  
25 240 daily life, mainly in resuming work, physical exercise, housekeeping and leisure activities. As early  
26  
27 241 determinants for a delay in the resumption of patient's habitual level of participation levels over the  
28  
29 242 first year, higher levels of self-experienced breathlessness and fatigue complaints, more perceived  
30  
31 243 limitations in daily life as well as personal factors (having a passive coping style, anxiety complaints or  
32  
33 244 depression complaints) were found.  
34  
35  
36  
37

38 245 In previous Dutch studies focusing on overall post-ICU COVID-19 survivors, an average age of 61-63  
39  
40 246 was found, 69-72% men, with a median length of stay of 18-20 days in the ICU (33,34). These  
41  
42 247 demographic data seem to correspond with findings of current study, taking into account that in the  
43  
44 248 first COVID-19 wave, 83% of all post-ICU COVID-19 patients were transferred to a rehabilitation centre  
45  
46 249 (34). Heesakker et al. reported that in patients who survived one year following ICU treatment for  
47  
48 250 COVID-19, physical, mental, or cognitive symptoms were often reported (33). This corresponds with  
49  
50 251 the findings of the current study, whereas various physical, mental and cognitive impairments were  
51  
52 252 seen one year after ICU admission. However, to our knowledge, this is the first study to report  
53  
54 253 differences in the resumption of participation levels in post-ICU COVID-19 patients. Mean participation  
55  
56 254 levels increased to 86.1 one year after ICU discharge. As a reference, in other non-COVID patients (i.e.  
57  
58  
59  
60

1  
2  
3 255 stroke, acquired brain injury, progressive neurologic diseases, spinal cord injury and acute coronary  
4  
5 256 syndrome), participation levels between 70.6-83.5 have been observed (35–37). In all non-COVID  
6  
7 257 patient groups, patients mainly reported restrictions in work/education, housekeeping, physical  
8  
9  
10 258 exercise and performing leisure activities, which is in accordance with restrictions in participation  
11  
12 259 reported in current study (36,37).

13  
14 260 Moreover, these results showed that higher scores of self-experienced breathlessness or fatigue and  
15  
16 261 more perceived limitations in daily life in the early phase of rehabilitation were associated with a  
17  
18 262 delayed recovery of participation levels over the first year. Furthermore, patients with a less active  
19  
20 263 coping style, those that were more anxious or reported to perceive more depressive complaints had a  
21  
22 264 delayed recovery of their level of participation over the first year. For all these determinants,  
23  
24 265 participation levels also appeared to be lower in the early phase of rehabilitation. These findings  
25  
26 266 indicate that patients with a higher level of anxiety and those with a higher level of depression had a  
27  
28 267 significantly slower improvement in participation levels during the first months, followed by a more  
29  
30 268 progressive recovery, especially in the last months. In addition, patients with more breathlessness  
31  
32 269 complaints, more fatigue complaints or more perceived limitations in daily life in the early phase of  
33  
34 270 rehabilitation and patients with a passive coping style showed a more progressive recovery of  
35  
36 271 participation levels especially in the last months.

37  
38  
39 272 Complaints of fatigue or breathlessness may be due to underlying medical problems or to the  
40  
41 273 contribution of personal factors. Previous study's showed significant recovery of respiratory function  
42  
43 274 and physical performance in the first year after ICU discharge due to COVID-19. Nevertheless, patients  
44  
45 275 still experience breathlessness and fatigue complaints after one year (38,39). Another finding in  
46  
47 276 current study was that early determinants related to the severity of the COVID-19 infection period  
48  
49 277 itself (such as ICU stay-specific parameters and physical parameters as age, sex, muscle strength,  
50  
51 278 functional exercise capacity and pulmonary function) did not individually explain progress in recovery  
52  
53 279 of participation over time. Contrary to expectations, this may indicate that non-physical factors such  
54  
55 280 as coping style, subjectively experienced physical impairments (including fatigue and breathlessness)  
56  
57  
58  
59  
60

1  
2  
3 281 and mental health issues (such as anxiety and depressive symptoms) seem more important to  
4  
5 282 determine progress in recovering the level of participation. Previous literature on post-ICU patients  
6  
7 283 indicated that critical care recovery has focused on post-ICU impairments experienced by patients.  
8  
9  
10 284 Whereas the positive aspects of recovery within the rehabilitation phase, including coping style and  
11  
12 285 resilience seems to be ignored (40,41). Resilience refers to the ability to face the challenges and  
13  
14 286 difficulties of life in a positive and adaptive manner, as well as the capacity to recover from an adverse  
15  
16 287 event (42). Higher levels of resilience have been linked to improved mental and physical health (43). It  
17  
18 288 is possible to improve the level of resilience. Which implies that resilience can be used to improve  
19  
20  
21 289 (emotional) well-being, with the possible consequence of improving participation levels.  
22

23 290

#### 25 291 Implications for clinical practice and further research

27 292 This study underlines the importance of looking at long-term consequence of COVID-19 ICU survivors  
28  
29 293 with an integral vision of health. Whether identical variables can be used to identify a delay in recovery  
30  
31 294 in patients who had a milder infection is currently still unclear. In this study, conclusions can be made  
32  
33 295 for a selected group (with ICU admission) of patients. Extrapolation to other populations needs to be  
34  
35 296 done with caution. Early detection of a passive coping style or mental impairments seems important  
36  
37 297 and should therefore be included in screening during early multidisciplinary rehabilitation. Further  
38  
39 298 research is needed to study the effect of early screening of a patients' level of coping/ resilience during  
40  
41 299 the first months after ICU discharge. As a consequence, an early intervention to increase  
42  
43 300 resilience/strengthen coping on indication could be promising to further strengthen social  
44  
45 301 participation, but needs to be further studied.  
46  
47  
48  
49

50 302

#### 52 303 Strengths and limitations

54 304 A strength of the study is that it only included the most severely affected post-ICU COVID-19 patients  
55  
56 305 referred to inpatient rehabilitation. In addition, this study used physical examination as well as  
57  
58 306 questionnaires, which means there was a combination of objective and subjective measurements. It is  
59  
60

1  
2  
3 307 notable that even in the most severely affected COVID-19 patients delayed recovery of participation is  
4  
5 308 associated with self-experienced physical impairments, mental impairments and coping style.  
6  
7 309 Nevertheless, some limitations of the current study need to be considered. First, sample size is limited  
8  
9 310 and a number of factors were studied for their effect on the course of participation recovery. The  
10  
11 311 limited sample size contributed to relatively wide confidence intervals. The risk of type II error should  
12  
13 312 therefore be considered while interpreting the data. A post-hoc power calculation revealed however  
14  
15 313 that the study had 90% power to detect an effect size of 0.2 for changes in participation levels over  
16  
17 314 time ( $\alpha = 0.05$ , mean correlation between repeated measures = 0.53). Still, p-values of the multiple  
18  
19 315 tests of association should be interpreted cautiously, because we cannot exclude erroneous  
20  
21 316 interpretations of statistical significant findings (i.e. type I error). However, since our results support a  
22  
23 317 certain pattern, we believe that the main conclusions of this study are solid. Second, number of  
24  
25 318 variables available to describe the acute illness severity were limited. Further research is needed to  
26  
27 319 investigate this in a larger cohort (all ICU patients, not just rehabilitation patients) to confirm this  
28  
29 320 finding. Third, due to high workload on the ward, 23 patients were not approached in time for consent  
30  
31 321 to participate. In our opinion, this is unlikely to have led to selection bias, but this cannot be excluded.  
32  
33 322 Finally, the lockdown and the inability to perform social and outdoor activities may have affected the  
34  
35 323 total USER-P score as this scale allows the rating of 'not applicable'. Since the study- and lockdown  
36  
37 324 period were similar for all patients, we expect no difference in the study patients. Although it may have  
38  
39 325 affected the recovery course of participation recovery for the entire patient group, it is not expected  
40  
41 326 to have affected the predictors.  
42  
43  
44  
45  
46  
47  
48  
49

## 50 328 Conclusion

51  
52 329 For patients admitted to an ICU for COVID-19, participation levels improves in the first year after ICU  
53  
54 330 discharge. However, at one year after discharge, many patients still experience limitations in daily life,  
55  
56 331 mainly in resuming work, physical exercise, housekeeping and leisure activities. Our results indicate  
57  
58 332 that progress of recovery in participation in the first year after discharge is associated with early  
59  
60

1  
2  
3 333 determinants in coping style, subjectively experienced physical impairments (breathlessness and  
4  
5 334 fatigue) and mental impairments (anxiety and depression) rather than medical variables. This study  
6  
7 335 supports the need for an integral perspective on health to facilitate the identification of factors that  
8  
9 336 delay the recovery trajectory for participation in the first year after ICU discharge. Personal factors  
10  
11 337 such as a passive coping style and more anxiety- or depression complaints seem relevant to this.  
12  
13 338 Rehabilitation care needs to anticipate on these topics, starting in the early rehabilitation phase of  
14  
15 339 post-ICU COVID-19 care.  
16  
17  
18  
19 340  
20  
21 341

22  
23 342 Acknowledgements: We would like to thank all physiotherapist and students for their valuable  
24  
25 343 contribution for collecting all data. We also thank all participants.  
26  
27

28 344 Author contributors: CW, JV, BH and SJSS were responsible for the study design. The statistical analysis  
29  
30 345 plan was designed by CW, SJSS and SvK. Statistical analysis was done by CW, with control of SJSS and  
31  
32 346 SvK. Practical implication was done by CW, SvS and YH. The first draft of the paper was written by CW  
33  
34 347 and all co-authors reviewed and approved it for submission. CW and JV are the guarantors. The  
35  
36 348 corresponding author attests that all listed authors meet authorship criteria and that no others  
37  
38 349 meeting the criteria have been omitted.  
39  
40  
41

42 350 Funding: This research received no specific grant from any funding agency in the public, commercial or  
43  
44 351 not-for-profit sectors.  
45  
46

47 352 Competing interests: All authors have completed the ICMJE uniform disclosure form at  
48  
49 353 <http://www.icmje.org/disclosure-of-interest/> and declare: no support from any organisation for the  
50  
51 354 submitted work; no financial relationships with any organisations that might have an interest in the  
52  
53 355 submitted work in the past three years; no other relationships or activities that could appear to have  
54  
55 356 influenced the submitted work  
56  
57  
58

59 357 Patient consent for publication: Not required.  
60



1  
2  
3 358 Dissemination to participants and related patient and public communities: The study results will be  
4  
5 359 disseminated to the public through our media channels or national and international conferences.  
6  
7

8 360 Ethical approval: The local medical ethics committee Zuyderland METC (METCZ20200086) approved  
9  
10 361 the study.  
11  
12

13 362 Data availability statement: To guarantee the confidentiality of personal and health information, only  
14  
15 363 the authors have had access to the data during the study. Data is available (anonymised), but the  
16  
17 364 corresponding author must be contacted to request these data. Data will be kept for 15 years  
18  
19

20 365 Open access: This is an open access article distributed in accordance with the Creative Commons  
21  
22 366 Attribution Non Commercial (CC BY-NC 4.0) license, which permits others to distribute, remix, adapt,  
23  
24 367 build upon this work non-commercially, and license their derivative works on different terms, provided  
25  
26 368 the original work is properly cited, appropriate credit is given, any changes made indicated, and the  
27  
28 369 use is non-commercial  
29  
30  
31

32  
33 370  
34

35 371 ORCID ID: Carolina Wiertz <https://orcid.org/0000-0002-7703-2508>  
36  
37

38 372  
39  
40  
41  
42  
43  
44  
45  
46  
47  
48  
49  
50  
51  
52  
53  
54  
55  
56  
57  
58  
59  
60

1  
2  
3 373 **References**

- 4  
5 374 1. RIVM. Actuele informatie over het nieuwe coronavirus (COVID-19) [Internet]. 22-05-2020.  
6  
7 375 Available from: <https://www.rivm.nl/coronavirus-covid-19/actueel>  
8  
9  
10 376 2. NICE. COVID-19 infecties op de IC's [Internet]. Nationale Intensive Care Evaluatie. [cited 2020  
11  
12 377 Jul 2]. Available from: [https://www.stichting-nice.nl/COVID\\_rapport.pdf](https://www.stichting-nice.nl/COVID_rapport.pdf)  
13  
14  
15 378 3. Tan E, Song J, Deane AM, Plummer MP. Global Impact of Coronavirus Disease 2019 Infection  
16  
17 379 Requiring Admission to the ICU: A Systematic Review and Meta-analysis. *Chest*. 2021;  
18  
19  
20 380 4. Needham DM, Davidson J, Cohen H, Hopkins RO, Weinert C, Wunsch H, et al. Improving long-  
21  
22 381 term outcomes after discharge from intensive care unit: Report from a stakeholders'  
23  
24 382 conference. *Crit Care Med*. 2012 Feb;40(2):502–9.  
25  
26  
27 383 5. Dowdy DW, Eid MP, Sedrakyan A, Mendez-Tellez PA, Pronovost PJ, Herridge MS, et al. Quality  
28  
29 384 of life in adult survivors of critical illness: A systematic review of the literature. Vol. 31,  
30  
31 385 *Intensive Care Medicine*. Springer Verlag; 2005. p. 611–20.  
32  
33  
34  
35 386 6. Desai S V., Law TJ, Needham DM. Long-term complications of critical care. *Critical Care*  
36  
37 387 *Medicine*. 2011.  
38  
39  
40 388 7. Ohtake PJ, Lee AC, Scott JC, Hinman RS, Ali NA, Hinkson CR, et al. Physical impairments  
41  
42 389 associated with post-intensive care syndrome: Systematic review based on the world health  
43  
44 390 organization's international classification of functioning, disability and health framework.  
45  
46 391 *Physical Therapy*. 2018.  
47  
48  
49  
50 392 8. Wiertz CMH, Vints WAJ, Maas GJCM, Rasquin SMC, van Horn YY, Dremmen MPM, et al.  
51  
52 393 COVID-19: patient characteristics in the first phase of post-intensive care rehabilitation. *Arch*  
53  
54 394 *Rehabil Res Clin Transl*. 2021;  
55  
56  
57 395 9. Martillo MA, Dangayach NS, Tabacof L, Spielman LA, Dams-O'Connor K, Chan CC, et al.  
58  
59 396 *Postintensive Care Syndrome in Survivors of Critical Illness Related to Coronavirus Disease*

- 1  
2  
3 397 2019: Cohort Study from a New York City Critical Care Recovery Clinic\*. Crit Care Med. 2021;  
4  
5  
6 398 10. Rousseau AF, Minguet P, Colson C, Kellens I, Chaabane S, Delanaye P, et al. Post-intensive care  
7  
8 399 syndrome after a critical COVID-19: cohort study from a Belgian follow-up clinic. Ann Intensive  
9  
10 400 Care. 2021;  
11  
12  
13 401 11. Leite VF, Rampim DB, Jorge VC, de Lima M do CC, Cezarino LG, da Rocha CN, et al. Persistent  
14  
15 402 Symptoms and Disability After COVID-19 Hospitalization: Data From a Comprehensive  
16  
17 403 Telerehabilitation Program. Arch Phys Med Rehabil. 2021;  
18  
19  
20 404 12. Veenendaal N van, van der Meulen IC, Onrust M, Paans W, Dieperink W, van der Voort PHJ.  
21  
22 405 Six-month outcomes in covid-19 icu patients and their family members: A prospective cohort  
23  
24 406 study. Healthc. 2021;  
25  
26  
27 407 13. FMS. COVID-19 [Internet]. 2022. Available from: [https://richtlijndatabase.nl/richtlijn/covid-](https://richtlijndatabase.nl/richtlijn/covid-19/startpagina_-_covid-19.html)  
28  
29 408 [19/startpagina\\_-\\_covid-19.html](https://richtlijndatabase.nl/richtlijn/covid-19/startpagina_-_covid-19.html)  
30  
31  
32  
33 409 14. (WHO) WHO. The international Classification of Functioning, Disability and Health - ICF  
34  
35 410 [Internet]. 2001. Available from: [https://www.who.int/classifications/international-](https://www.who.int/classifications/international-classification-of-functioning-disability-and-health)  
36  
37 411 [classification-of-functioning-disability-and-health](https://www.who.int/classifications/international-classification-of-functioning-disability-and-health)  
38  
39  
40 412 15. de Graaf J, Brouwers M, Post M. Behandelprogramma COVID-19 post-IC in de Medisch  
41  
42 413 Specialistische Revalidatie (De Hoogstraat). Utrecht, The Netherlands; 2020.  
43  
44  
45 414 16. Post MWM, Van Der Zee CH, Hennink J, Schafrat CG, Visser-Meily JMA, Van Berlekom SB.  
46  
47 415 Validity of the utrecht scale for evaluation of rehabilitation- participation. Disabil Rehabil.  
48  
49 416 2012;  
50  
51  
52  
53 417 17. Van Der Zee CH, Visser-Meily JMA, Lindeman E, Kappelle LJ, Post MWM. Participation in the  
54  
55 418 chronic phase of stroke. Top Stroke Rehabil. 2013;  
56  
57  
58 419 18. Vanpee G, Segers J, Van Mechelen H, Wouters P, Van Den Berghe G, Hermans G, et al. The  
59  
60

- 1  
2  
3 420 interobserver agreement of handheld dynamometry for muscle strength assessment in  
4  
5 421 critically ill patients. *Crit Care Med.* 2011;  
6  
7  
8 422 19. Andrews AW, Thomas MW, Bohannon RW. Normative values for isometric muscle force  
9  
10 423 measurements obtained with hand-held dynamometers. *Phys Ther.* 1996;76(3):248–59.  
11  
12  
13 424 20. Bohannon RW. Reference values for extremity muscle strength obtained by hand-held  
14  
15 425 dynamometry from adults aged 20 to 79 years. *Arch Phys Med Rehabil.* 1997;78(1):26–32.  
16  
17  
18 426 21. Chan KS, Pfoh ER, Denehy L, Elliott D, Holland AE, Dinglas VD, et al. Construct validity and  
19  
20 427 minimal important difference of 6-minute walk distance in survivors of acute respiratory  
21  
22 428 failure. *Chest.* 2015;  
23  
24  
25 429 22. Troosters T, Gosselink R, Decramer M. Six minute walking distance in healthy elderly subjects.  
26  
27 430 *Eur Respir J.* 1999;  
28  
29  
30 431 23. Graham BL, Steenbruggen I, Barjaktarevic IZ, Cooper BG, Hall GL, Hallstrand TS, et al.  
31  
32 432 Standardization of spirometry 2019 update an official American Thoracic Society and  
33  
34 433 European Respiratory Society technical statement. *American Journal of Respiratory and*  
35  
36 434 *Critical Care Medicine.* 2019.  
37  
38  
39 435 24. Stenton C. The MRC breathlessness scale. *Occup Med (Lond).* 2008;  
40  
41  
42 436 25. Williamson A, Hoggart B. Pain: A review of three commonly used pain rating scales. *Journal of*  
43  
44 437 *Clinical Nursing.* 2005.  
45  
46  
47 438 26. Smets EMA, Garssen B, Bonke B, De Haes JCJM. The multidimensional Fatigue Inventory (MFI)  
48  
49 439 psychometric qualities of an instrument to assess fatigue. *J Psychosom Res.* 1995;  
50  
51  
52 440 27. Feng D, Laurel F, Castille D, McCormick AKHG, Held S. Reliability, construct validity, and  
53  
54 441 measurement invariance of the PROMIS Physical Function 8b—Adult Short Form v2.0. *Qual*  
55  
56 442 *Life Res.* 2020;  
57  
58  
59  
60

- 1  
2  
3 443 28. HealthMeasures Scoring Service powered by Assessment CenterSM [Internet]. [cited 2021 Feb  
4  
5 444 20]. Available from: [https://www.assessmentcenter.net/ac\\_scoring-service](https://www.assessmentcenter.net/ac_scoring-service)  
6  
7  
8 445 29. Bjelland I, Dahl AA, Haug TT, Neckelmann D. The validity of the Hospital Anxiety and  
9  
10 446 Depression Scale: An updated literature review. *J Psychosom Res.* 2002;  
11  
12  
13 447 30. Olff M, Bakker A. Global Psychotrauma Screen (GPS); User guide september 2021 [Internet].  
14  
15 448 2016 [cited 2022 Feb 2]. Available from: <https://nl.global-psychotrauma.net/gps>  
16  
17  
18 449 31. van Heugten C, Rasquin S, Winkens I, Beusmans G, Verhey F. Checklist for cognitive and  
19  
20 450 emotional consequences following stroke (CLCE-24): Development, usability and quality of the  
21  
22 451 self-report version. *Clin Neurol Neurosurg.* 2007;  
23  
24  
25 452 32. Bode C, Thoolen B, Ridder D. Het meten van proactieve copingvaardigheden: Psychometrische  
26  
27 453 eigenschappen van de Utrechtse Proactieve Coping Competentie lijst (UPCC). *Psychol en*  
28  
29 454 *Gezondh.* 2008;  
30  
31  
32  
33 455 33. Heesakkers H, van der Hoeven JG, Corsten S, Janssen I, Ewalds E, Simons KS, et al. Clinical  
34  
35 456 Outcomes Among Patients With 1-Year Survival Following Intensive Care Unit Treatment for  
36  
37 457 COVID-19. *JAMA.* 2022;(January).  
38  
39  
40 458 34. van Gassel RJJ, Bels JLM, Raafs A, van Bussel BCT, van de Poll MCG, Simons SO, et al. High  
41  
42 459 prevalence of pulmonary sequelae at 3 months after hospital discharge in mechanically  
43  
44 460 ventilated survivors of COVID-19. *American Journal of Respiratory and Critical Care Medicine.*  
45  
46 461 2021.  
47  
48  
49  
50 462 35. Van Mierlo ML, Van Heugten CM, Post MWM, Hajós TRS, Kappelle LJ, Visser-Meily JMA.  
51  
52 463 Quality of life during the first two years post stroke: The Restore4Stroke cohort study.  
53  
54 464 *Cerebrovasc Dis.* 2016;  
55  
56  
57 465 36. de Graaf JA, van Mierlo ML, Post MWM, Achterberg WP, Kappelle LJ, Visser-Meily JMA. Long-  
58  
59 466 term restrictions in participation in stroke survivors under and over 70 years of age. *Disabil*

- 1  
2  
3 467 Rehabil. 2018;  
4  
5  
6 468 37. Mol TI, van Bennekom CA, Schepers VP, ter Hoeve N, Kruitwagen-van Reenen ET, Visser-Meily  
7  
8 469 JM, et al. Differences in Societal Participation Across Diagnostic Groups: Secondary Analyses  
9  
10 470 of 8 Studies Using the Utrecht Scale for Evaluation of Rehabilitation-Participation. Arch Phys  
11  
12 471 Med Rehabil. 2021;  
13  
14  
15 472 38. Gamberini L, Mazzoli CA, Prediletto I, Sintonen H, Scaramuzzo G, Allegri D, et al. Health-  
16  
17 473 related quality of life profiles, trajectories, persistent symptoms and pulmonary function one  
18  
19 474 year after ICU discharge in invasively ventilated COVID-19 patients, a prospective follow-up  
20  
21 475 study. Respir Med. 2021;  
22  
23  
24  
25 476 39. Bels JLM, van Gassel RJJ, Timmerman L, Hemmen B, van de Poll MCG, Peters NHGM, et al.  
26  
27 477 One year respiratory and functional outcomes of mechanically ventilated COVID-19 survivors:  
28  
29 478 A prospective cohort study. Am J Respir Crit Care Med. 2022;Online ahead of print.  
30  
31  
32  
33 479 40. Maley JH, Brewster I, Mayoral I, Siruckova R, Adams S, McGraw KA, et al. Resilience in  
34  
35 480 survivors of critical illness in the context of the survivors' experience and recovery. Ann Am  
36  
37 481 Thorac Soc. 2016;  
38  
39  
40 482 41. Haines KJ, Hibbert E, Leggett N, Boehm LM, Hall T, Bakhru RN, et al. Transitions of Care After  
41  
42 483 Critical Illness-Challenges to Recovery and Adaptive Problem Solving. Crit Care Med. 2021;  
43  
44  
45 484 42. Steinhardt M, Dolbier C. Evaluation of a resilience intervention to enhance coping strategies  
46  
47 485 and protective factors and decrease symptomatology. J Am Coll Heal. 2008;  
48  
49  
50 486 43. Schure MB, Odden M, Goins RT. The association of resilience with mental and physical health  
51  
52 487 among older american indians: The native elder care study. Am Indian Alaska Nativ Ment Heal  
53  
54  
55 488 Res. 2013;  
56  
57  
58 489  
59  
60

1  
2  
3 490 **Figure Legend:**  
4

- 5 491 - Figure 1: ICF model and measurement instruments used.  
6 492 - Figure 2: Subject recruitment flowchart.  
7 493 - Figure 3: The recovery of participation levels (USER-P restriction subscale) in the first year  
8 494 after ICU discharge in post-COVID-19 patients.  
9 495 - Figure 4: The influence of early levels of body function impairments, activity limitations and  
10 496 personal factors on the recovery of participation levels (USER-P restriction subscale).  
11  
12  
13  
14  
15  
16  
17  
18  
19  
20  
21  
22  
23  
24  
25  
26  
27  
28  
29  
30  
31  
32  
33  
34  
35  
36  
37  
38  
39  
40  
41  
42  
43  
44  
45  
46  
47  
48  
49  
50  
51  
52  
53  
54  
55  
56  
57  
58  
59  
60

For peer review only



Figure 1. ICF model and measurement instruments used.

Abbreviations: PICS, post intensive care syndrome; USER-P, Utrecht Scale for Evaluation of Rehabilitation-Participation; HHD, handheld dynamometer; MFI, multidimensional Fatigue Inventory; HADS, Hospital Anxiety and Depression Scale; GPS, The Global Psychotrauma Screen; CLC-IC, Checklist for Cognitive consequences after an ICU-admission; 6-MWT, 6-minute walk test; UPCC, Utrecht Proactive Coping Scale  
ICF, International Classification of Functioning, Disability and Health

338x164mm (96 x 96 DPI)



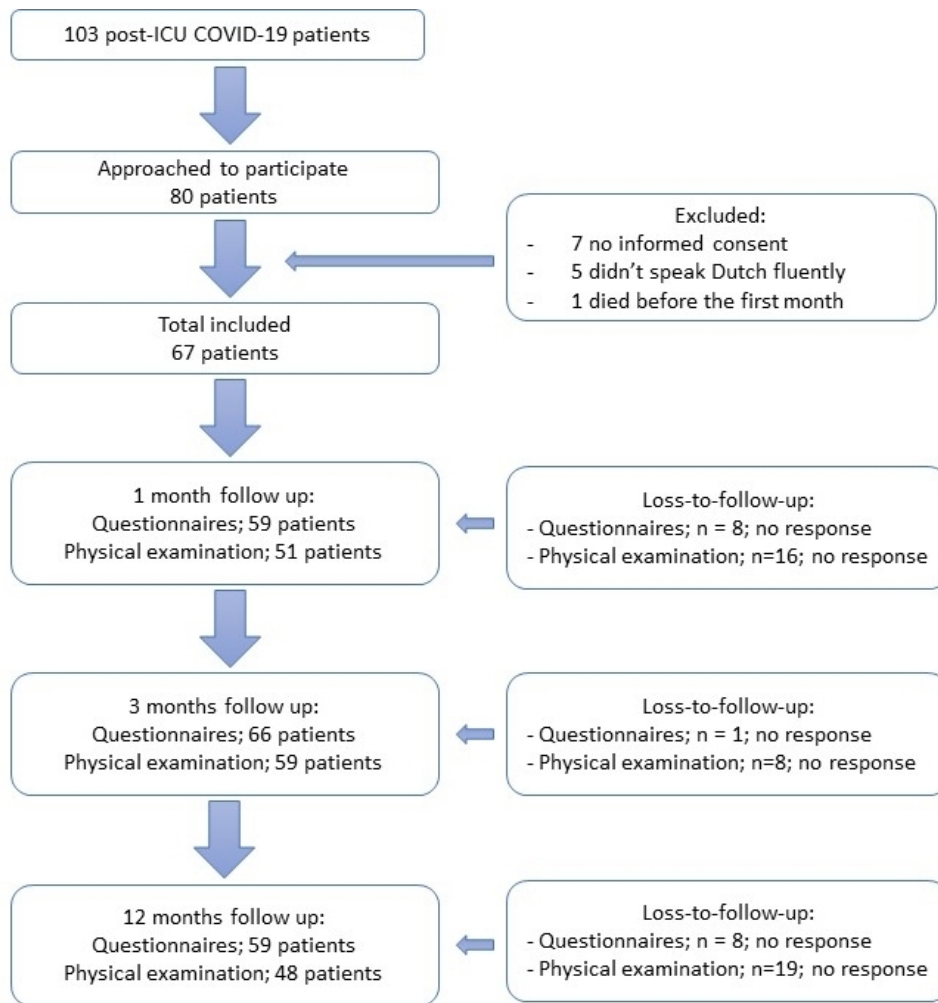

Figure 2; Subject recruitment flowchart.

179x181mm (96 x 96 DPI)

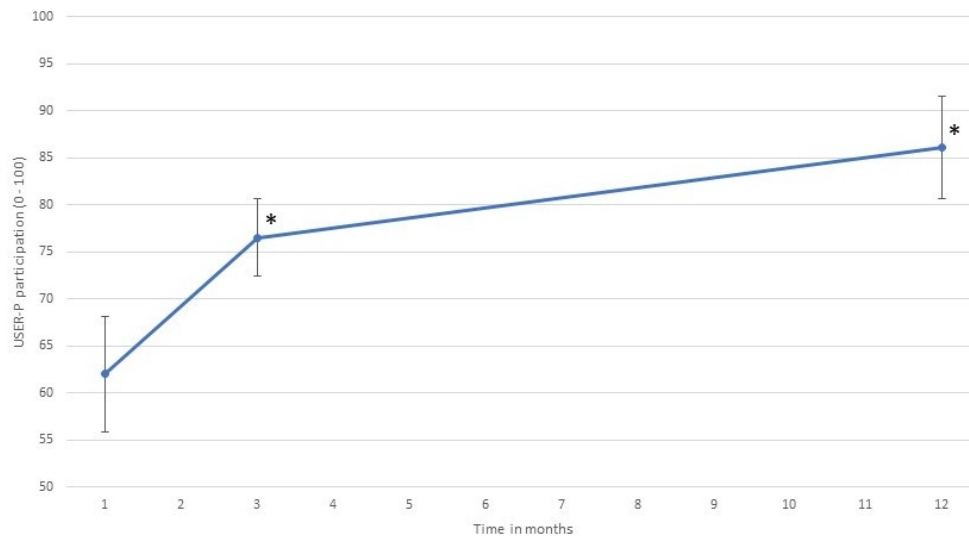

Figure 3; The recovery of participation levels (USER-P restriction subscale) in the first year after ICU discharge in post-COVID-19 patients. Results are expressed as mean with corresponding 95% confidence interval. \*  $p < 0.01$  (compared to previous measurement moment)

222x129mm (96 x 96 DPI)

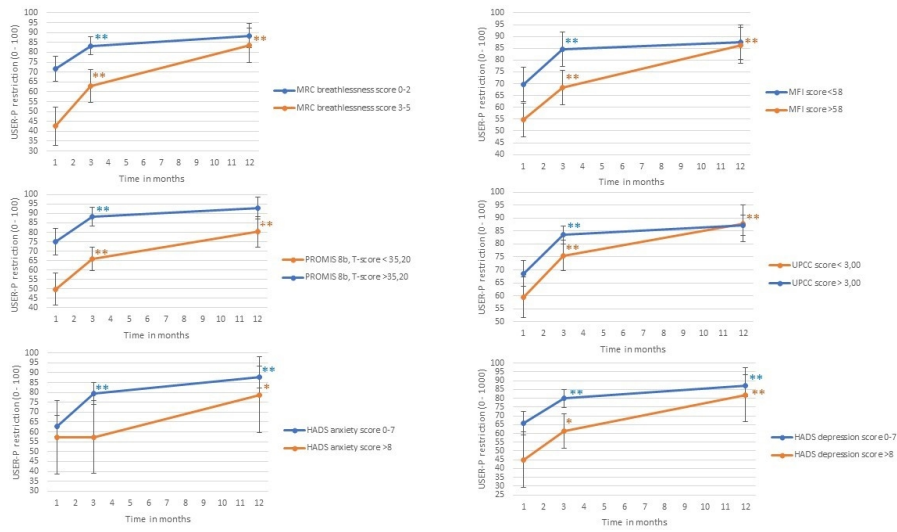

Figure 4; The influence of early levels of body function impairments, activity limitations and personal factors on the recovery of participation levels (USER-P restriction subscale). For illustrative purposes, subgroups have been created based on cut-off value (HADS) or the median if no specific cut-off value is known (MRC, MFI, PROMIS 8b, UPCC). Results are expressed as means with corresponding 95% confidence interval. \* p < 0.05 and \*\* p < 0.01 (compared to previous measurement moment).

338x177mm (96 x 96 DPI)

STROBE Statement—Checklist of items that should be included in reports of *cohort studies*

|                              | Item No | Recommendation                                                                                                                                                                                                                                                                                                                         | Page No       |
|------------------------------|---------|----------------------------------------------------------------------------------------------------------------------------------------------------------------------------------------------------------------------------------------------------------------------------------------------------------------------------------------|---------------|
| <b>Title and abstract</b>    | 1       | (a) Indicate the study's design with a commonly used term in the title or the abstract                                                                                                                                                                                                                                                 | 1             |
|                              |         | (b) Provide in the abstract an informative and balanced summary of what was done and what was found                                                                                                                                                                                                                                    | 2-3           |
| <b>Introduction</b>          |         |                                                                                                                                                                                                                                                                                                                                        |               |
| Background/rationale         | 2       | Explain the scientific background and rationale for the investigation being reported                                                                                                                                                                                                                                                   | 4             |
| Objectives                   | 3       | State specific objectives, including any prespecified hypotheses                                                                                                                                                                                                                                                                       | 4             |
| <b>Methods</b>               |         |                                                                                                                                                                                                                                                                                                                                        |               |
| Study design                 | 4       | Present key elements of study design early in the paper                                                                                                                                                                                                                                                                                | 5             |
| Setting                      | 5       | Describe the setting, locations, and relevant dates, including periods of recruitment, exposure, follow-up, and data collection                                                                                                                                                                                                        | 5             |
| Participants                 | 6       | (a) Give the eligibility criteria, and the sources and methods of selection of participants. Describe methods of follow-up<br><br>(b) For matched studies, give matching criteria and number of exposed and unexposed                                                                                                                  | 5             |
| Variables                    | 7       | Clearly define all outcomes, exposures, predictors, potential confounders, and effect modifiers. Give diagnostic criteria, if applicable                                                                                                                                                                                               | 5-7           |
| Data sources/<br>measurement | 8*      | For each variable of interest, give sources of data and details of methods of assessment (measurement). Describe comparability of assessment methods if there is more than one group                                                                                                                                                   | 5-7           |
| Bias                         | 9       | Describe any efforts to address potential sources of bias                                                                                                                                                                                                                                                                              | 7             |
| Study size                   | 10      | Explain how the study size was arrived at                                                                                                                                                                                                                                                                                              | NA            |
| Quantitative variables       | 11      | Explain how quantitative variables were handled in the analyses. If applicable, describe which groupings were chosen and why                                                                                                                                                                                                           | 7             |
| Statistical methods          | 12      | (a) Describe all statistical methods, including those used to control for confounding<br><br>(b) Describe any methods used to examine subgroups and interactions<br><br>(c) Explain how missing data were addressed<br><br>(d) If applicable, explain how loss to follow-up was addressed<br><br>(e) Describe any sensitivity analyses | 7             |
| <b>Results</b>               |         |                                                                                                                                                                                                                                                                                                                                        |               |
| Participants                 | 13*     | (a) Report numbers of individuals at each stage of study—eg numbers potentially eligible, examined for eligibility, confirmed eligible, included in the study, completing follow-up, and analysed                                                                                                                                      | 8<br><br>Fig2 |

|                          |     |                                                                                                                                                                                                                                                                                                                                                                                                                       |       |
|--------------------------|-----|-----------------------------------------------------------------------------------------------------------------------------------------------------------------------------------------------------------------------------------------------------------------------------------------------------------------------------------------------------------------------------------------------------------------------|-------|
|                          |     | (b) Give reasons for non-participation at each stage                                                                                                                                                                                                                                                                                                                                                                  |       |
|                          |     | (c) Consider use of a flow diagram                                                                                                                                                                                                                                                                                                                                                                                    |       |
| Descriptive data         | 14* | (a) Give characteristics of study participants (eg demographic, clinical, social) and information on exposures and potential confounders<br><br>(b) Indicate number of participants with missing data for each variable of interest<br><br>(c) Summarise follow-up time (eg, average and total amount)                                                                                                                | 8     |
| Outcome data             | 15* | Report numbers of outcome events or summary measures over time                                                                                                                                                                                                                                                                                                                                                        | 8     |
| Main results             | 16  | (a) Give unadjusted estimates and, if applicable, confounder-adjusted estimates and their precision (eg, 95% confidence interval). Make clear which confounders were adjusted for and why they were included<br><br>(b) Report category boundaries when continuous variables were categorized<br><br>(c) If relevant, consider translating estimates of relative risk into absolute risk for a meaningful time period | 8-11  |
| Other analyses           | 17  | Report other analyses done—eg analyses of subgroups and interactions, and sensitivity analyses                                                                                                                                                                                                                                                                                                                        | 8-11  |
| <b>Discussion</b>        |     |                                                                                                                                                                                                                                                                                                                                                                                                                       |       |
| Key results              | 18  | Summarise key results with reference to study objectives                                                                                                                                                                                                                                                                                                                                                              | 12    |
| Limitations              | 19  | Discuss limitations of the study, taking into account sources of potential bias or imprecision. Discuss both direction and magnitude of any potential bias                                                                                                                                                                                                                                                            | 14-15 |
| Interpretation           | 20  | Give a cautious overall interpretation of results considering objectives, limitations, multiplicity of analyses, results from similar studies, and other relevant evidence                                                                                                                                                                                                                                            | 12-14 |
| Generalisability         | 21  | Discuss the generalisability (external validity) of the study results                                                                                                                                                                                                                                                                                                                                                 | 14-16 |
| <b>Other information</b> |     |                                                                                                                                                                                                                                                                                                                                                                                                                       |       |
| Funding                  | 22  | Give the source of funding and the role of the funders for the present study and, if applicable, for the original study on which the present article is based                                                                                                                                                                                                                                                         | 16    |

\*Give information separately for exposed and unexposed groups.

**Note:** An Explanation and Elaboration article discusses each checklist item and gives methodological background and published examples of transparent reporting. The STROBE checklist is best used in conjunction with this article (freely available on the Web sites of PLoS Medicine at <http://www.plosmedicine.org/>, Annals of Internal Medicine at <http://www.annals.org/>, and Epidemiology at <http://www.epidem.com/>). Information on the STROBE Initiative is available at <http://www.strobe-statement.org>.

# BMJ Open

## Life after COVID-19 the road from intensive care back to living: a prospective cohort study

|                                 |                                                                                                                                                                                                                                                                                                                                                                                                                                                                                                                                                                                                                                                                                                                                                                                                                                                      |
|---------------------------------|------------------------------------------------------------------------------------------------------------------------------------------------------------------------------------------------------------------------------------------------------------------------------------------------------------------------------------------------------------------------------------------------------------------------------------------------------------------------------------------------------------------------------------------------------------------------------------------------------------------------------------------------------------------------------------------------------------------------------------------------------------------------------------------------------------------------------------------------------|
| Journal:                        | <i>BMJ Open</i>                                                                                                                                                                                                                                                                                                                                                                                                                                                                                                                                                                                                                                                                                                                                                                                                                                      |
| Manuscript ID                   | bmjopen-2022-062332.R2                                                                                                                                                                                                                                                                                                                                                                                                                                                                                                                                                                                                                                                                                                                                                                                                                               |
| Article Type:                   | Original research                                                                                                                                                                                                                                                                                                                                                                                                                                                                                                                                                                                                                                                                                                                                                                                                                                    |
| Date Submitted by the Author:   | 02-Sep-2022                                                                                                                                                                                                                                                                                                                                                                                                                                                                                                                                                                                                                                                                                                                                                                                                                                          |
| Complete List of Authors:       | Wiertz, Carolina; Adelante, Rehabilitation medicine; Maastricht University, Department of Rehabilitation Medicine Research School CAPHRI<br>Hemmen, Bena; Adelante, Rehabilitation medicine; Maastricht University, Department of Rehabilitation Medicine Research School CAPHRI<br>Sep, Simone JS; Adelante, Rehabilitation medicine; Maastricht University, Department of Rehabilitation Medicine Research School CAPHRI<br>van Santen, Susanne; Maastricht Universitair Medisch Centrum+, Department of Intensive Care<br>van Horn, Yvette; Adelante, Rehabilitation medicine<br>van Kuijk, Sander; Maastricht Universitair Medisch Centrum+, Clinical Epidemiology and Medical Technology Assessment<br>Verbunt, Jeanine; Adelante, Rehabilitation medicine; Maastricht University, Department of Rehabilitation Medicine Research School CAPHRI |
| <b>Primary Subject Heading</b>: | Rehabilitation medicine                                                                                                                                                                                                                                                                                                                                                                                                                                                                                                                                                                                                                                                                                                                                                                                                                              |
| Secondary Subject Heading:      | Intensive care                                                                                                                                                                                                                                                                                                                                                                                                                                                                                                                                                                                                                                                                                                                                                                                                                                       |
| Keywords:                       | COVID-19, REHABILITATION MEDICINE, Adult intensive & critical care < INTENSIVE & CRITICAL CARE                                                                                                                                                                                                                                                                                                                                                                                                                                                                                                                                                                                                                                                                                                                                                       |
|                                 |                                                                                                                                                                                                                                                                                                                                                                                                                                                                                                                                                                                                                                                                                                                                                                                                                                                      |

SCHOLARONE™  
Manuscripts



I, the Submitting Author has the right to grant and does grant on behalf of all authors of the Work (as defined in the below author licence), an exclusive licence and/or a non-exclusive licence for contributions from authors who are: i) UK Crown employees; ii) where BMJ has agreed a CC-BY licence shall apply, and/or iii) in accordance with the terms applicable for US Federal Government officers or employees acting as part of their official duties; on a worldwide, perpetual, irrevocable, royalty-free basis to BMJ Publishing Group Ltd ("BMJ") its licensees and where the relevant Journal is co-owned by BMJ to the co-owners of the Journal, to publish the Work in this journal and any other BMJ products and to exploit all rights, as set out in our [licence](#).

The Submitting Author accepts and understands that any supply made under these terms is made by BMJ to the Submitting Author unless you are acting as an employee on behalf of your employer or a postgraduate student of an affiliated institution which is paying any applicable article publishing charge ("APC") for Open Access articles. Where the Submitting Author wishes to make the Work available on an Open Access basis (and intends to pay the relevant APC), the terms of reuse of such Open Access shall be governed by a Creative Commons licence – details of these licences and which [Creative Commons](#) licence will apply to this Work are set out in our licence referred to above.

Other than as permitted in any relevant BMJ Author's Self Archiving Policies, I confirm this Work has not been accepted for publication elsewhere, is not being considered for publication elsewhere and does not duplicate material already published. I confirm all authors consent to publication of this Work and authorise the granting of this licence.

1  
2  
3 **Life after COVID-19 the road from intensive care back to living: a prospective cohort study**  
4  
5

6  
7  
8 **Author's names**  
9

10 Carolina MH Wiertz MD<sup>1,2</sup>, Bena Hemmen MD PhD<sup>1,2</sup>, Simone JS Sep PhD<sup>1,2</sup>, Susanne van Santen MD<sup>3</sup>,  
11  
12 Yvette Y van Horn MD<sup>1</sup>, Sander MJ van Kuijk<sup>4</sup>, Jeanine A Verbunt MD PhD<sup>1,2</sup>  
13  
14

15  
16  
17 **Affiliation of authors**  
18

19 <sup>1</sup> Adelante Zorggroep, P.O. Box 88, 6430 AB Hoensbroek, The Netherlands.  
20

21 <sup>2</sup> Department of Rehabilitation Medicine Research School CAPHRI, Maastricht University, P.O.  
22  
23 Box 616, 6200 MD Maastricht, The Netherlands.  
24

25 <sup>3</sup> Department of Intensive Care Medicine, Maastricht University Medical Centre, 6202 AZ  
26  
27 Maastricht, The Netherlands.  
28

29 <sup>4</sup> Department of Clinical Epidemiology and Medical Technology Assessment, Maastricht  
30  
31 University Medical Centre, 6202 AZ Maastricht, The Netherlands.  
32  
33

34  
35  
36 **Corresponding author: Carolina Wiertz**  
37

38  
39 Adelante Zorggroep  
40

41 P.O. Box 88  
42

43 6430 AB Hoensbroek  
44

45 The Netherlands  
46

47  
48 E-mail: c.wiertz@adelante-zorggroep.nl  
49  
50  
51  
52  
53  
54  
55  
56  
57  
58  
59  
60



1  
2  
3 23 **Life after COVID-19 the road from intensive care back to living: a prospective cohort study**

4  
5  
6 24 **Abstract**

7  
8  
9 25 **Objectives:** The aim of the study was to evaluate recovery of participation in post-COVID-19 patients  
10  
11 26 during the first year after ICU discharge. The secondary aim was to identify the early determinants  
12  
13 27 associated with recovery of participation.

14  
15  
16 28 **Design:** Prospective cohort study.

17  
18  
19 29 **Setting:** COVID-19 post-ICU inpatient rehabilitation in the Netherlands, during the first epidemic wave  
20  
21 30 between April - July 2020, with one-year follow-up.

22  
23  
24 31 **Participants:** COVID-19 ICU survivors  $\geq 18$  years of age needing inpatient rehabilitation.

25  
26  
27 32 **Main outcome measures:** Participation in society was assessed by the 'Utrecht Scale for Evaluation of  
28  
29 33 Rehabilitation-Participation (USER-P) restrictions scale'. Secondary measures of body function  
30  
31 34 impairments (muscle force, pulmonary function, fatigue (MFI), breathlessness (MRC), pain (NRS)),  
32  
33 35 activity limitations (6MWT, PROMIS 8b), personal factors (coping (UPCC), Anxiety and depression  
34  
35 36 (HADS), post traumatic stress (GPS-PTSD-5), cognitive functioning (CLC-IC)) and social factors were  
36  
37 37 used. Statistical analyses: linear mixed-effects model, with recovery of participation levels as  
38  
39 38 dependent variable. Patient characteristics in domains of body function, activity limitations, personal  
40  
41 39 and social factors were added as independent variables

42  
43  
44 40 **Results:** This study included 67 COVID-19 ICU survivors (mean age 62y, 78% male). Mean USER-P  
45  
46 41 restrictions scores increased over time; mean participation levels increasing from 62.0, 76.5 to 86.1 at  
47  
48 42 one, three and 12 months respectively. After one year, 50% had not fully resumed work and  
49  
50 43 restrictions were reported in physical exercise (51%), household duties (46%), and leisure activities  
51  
52 44 (29%). Self-reported complaints of breathlessness and fatigue, more perceived limitations in daily life,  
53  
54 45 as well as personal factors (less pro-active coping style and anxiety/depression complaints) were  
55  
56 46 associated with delayed recovery of participation (all p-value < 0.05).

1  
2  
3 47 **Conclusions:** This study supports the view that an integral vision of health is important when looking  
4  
5 48 at the long-term consequence of post-IC COVID-19. Personal factors such as having a less proactive  
6  
7 49 coping style or mental impairments early on contribute to delayed recovery.  
8  
9

10  
11 50

12  
13 51 **Keywords:** COVID-19, Critical care, Rehabilitation medicine  
14  
15

16  
17 52

18  
19 53 **Strengths and limitations of this study**

- 20  
21 54 - This study only included the most severely affected post-ICU COVID-19 patients referred to  
22  
23 55 inpatient rehabilitation.  
24  
25  
26 56 - This study used physical examination as well as questionnaires, which means that there was a  
27  
28 57 combination of objective and subjective measurements.  
29  
30 58 - Although the sample size is small, a large number of factors were studied for their effect on  
31  
32 59 the course of participation recovery.  
33  
34  
35 60 - Twenty-three patients were not approached in time for consent to participate.  
36  
37 61 - The lockdown and the inability to perform social and outdoor activities may have affected the  
38  
39 62 total USER-P score.  
40

41  
42 63

43  
44 64 Word count abstract: 300  
45

46  
47 65 Word count main text: 3370  
48

49  
50 66 Number of figures and tables: 6  
51

52  
53 67  
54  
55  
56  
57  
58  
59  
60

## 68 Introduction

69 In the first wave of the coronavirus disease 2019 (COVID-19) pandemic in the Netherlands about 2%  
70 of all confirmed cases needed treatment in an intensive care unit (ICU) (1,2). About three-quarters of  
71 those admitted to ICU had acute respiratory distress syndrome (3) and many patients were recorded  
72 as having shock, acute kidney injury, thrombotic complications and/or cardiac injury (3).

73 Survivors of critical illness frequently experience new or worsening physical, cognitive and/or mental  
74 impairment, described as post intensive care syndrome (PICS) (4), which can have long-term effects on  
75 participation and quality of life (5–7). Immediately after ICU admission, COVID-19 patients display  
76 various physical impairments such as exertional hypoxemia, reduced overall muscle force, shoulder  
77 problems, dysphagia, and anxiety complaints (8). In the subacute phase (one to three months after ICU  
78 discharge) 90% of the post-ICU COVID patients still experience symptoms affecting at least one of the  
79 PICS domains (9,10). Due to the varying impact of severe COVID-19, patients may experience  
80 limitations in their participation in daily living, social functioning or work performance (11,12).  
81 Restrictions in participation may eventually lead to an increase in (healthcare) costs, since patients  
82 need for example more professional assistance in their ADL or return to work is delayed. Although  
83 impairments in various domains of functioning have been identified, any long-term effects on the  
84 recovery of participation are unclear. The effect that this new disease may have on participation,  
85 combined with the large number of COVID-19 ICU survivors, points to the need to study factors that  
86 could delay the recovery in participation of survivors after ICU discharge. Consequently, the aim of this  
87 study is to evaluate the recovery of participation of COVID-19 patients in the first year after ICU  
88 discharge followed by inpatient rehabilitation. The secondary aim was to identify early determinants  
89 associated with recovery of participation.

90

91

## 92 **Methods**

### 93 Study design and participants

94 This prospective cohort study was performed at Adelante Zorggroep, a rehabilitation centre in the  
95 South of the Netherlands. Patients with an indication for inpatient multidisciplinary rehabilitation were  
96 transferred to the rehabilitation centre. The indication was determined in the hospital by a consultant  
97 in rehabilitation medicine, based on their clinical judgement of the severity of physical, mental and/or  
98 cognitive impairments (13,14). All patients (aged 18 or older) referred for inpatient rehabilitation after  
99 ICU discharge for COVID-19 were eligible to participate in the study. The exclusion criterion was not  
100 speaking or reading the Dutch language fluently. All patients received inpatient multidisciplinary  
101 rehabilitation treatment including physiotherapy, occupational therapy, speechtherapy and  
102 psychology personalized to patient's limitations and needs according to the Dutch guideline for post-  
103 COVID ICU rehabilitation (13,15). All participants provided written informed consent. Patients were  
104 transferred to the rehabilitation centre from 7 (2 academic and 5 regional) hospitals in the region.  
105 COVID-19 was confirmed with a SARS-COV-19 positive PCR test. The local medical ethics committee  
106 Zuyderland METC (METCZ20200086) approved the study.

107 Patient and public involvement: Patients and/or the public were not involved in the design, or conduct,  
108 or reporting, or dissemination plans of this research.

109

### 110 Data collection

111 Data was collected in the form of baseline information at admission to the rehabilitation centre (T0),  
112 through physical examination and self-administered questionnaires after one (T1), three (T2) and  
113 twelve months (T3). Since different domains of functioning can be affected by COVID-19,  
114 measurements were chosen based on an integral vision of health and included body function  
115 impairments, activity limitations and participation restrictions as well as personal and social factors.  
116 These factors are derived as main domains in the International Classification of Functioning, Disability

1  
2  
3 117 and Health (ICF) that supports the classification of health and health-related conditions and their effect  
4  
5 118 on social participation (Figure 1) (14).

6  
7  
8 119 Primary outcome variable: Participation in society was assessed by the 'Utrecht Scale for Evaluation of  
9  
10 120 Rehabilitation-Participation (USER-P) restriction subscale'. This subscale consists of 11 items on  
11  
12 121 restrictions in vocational, leisure and social activities. Items are rated from 0 'not possible' to 3 'without  
13  
14 122 difficulty' and a 'not applicable' option. The total score ranges from 0 to 100, higher scores indicating  
15  
16 123 fewer restrictions in participation (16,17).

17  
18  
19  
20 124 Data on age, sex, comorbidities and parameters related to critical illness were collected from the  
21  
22 125 medical transfer letters (T0). Comorbidities were classed into diabetes mellitus, hypertension,  
23  
24 126 cardiovascular disease, lung disease and psychiatric disorders. Parameters related to severity of the  
25  
26 127 critical illness were length of ICU stay, invasive mechanical ventilation (IMV) (yes/no) and duration of  
27  
28 128 invasive IMV. The duration of the inpatient rehabilitation was recorded.

29  
30  
31  
32 129 Physical examination: Assessment of muscle strength, functional exercise capacity and pulmonary  
33  
34 130 function were part of physical examination. To measure muscle strength, a handheld dynamometer  
35  
36 131 (HHD) was used (18) to assess the following muscle groups: shoulder abduction, elbow flexion, wrist  
37  
38 132 extension, hip flexion and knee extension, all on patient's dominant side. HHD values were measured  
39  
40 133 in Newtons and percentages of the norm compared with healthy persons of the same sex, age, and  
41  
42 134 weight (19,20). Severe muscle weakness was defined as <80% of the norm score. For the clinical  
43  
44 135 assessment of the functional exercise capacity, the 6-minute walk test (6-MWT) was used, displayed  
45  
46 136 in meters and percentage of the norm (21,22). To evaluate pulmonary function Quark PFT spirometry  
47  
48 137 (Cosmed, Italy) was used (23). Forced expiratory volume in the first second ( $FEV_1$ ), forced vital capacity  
49  
50 138 (FVC) and  $FEV_1/FVC$  ratio were included in the analysis, displayed in percentage of the norm.

51  
52  
53  
54  
55 139 In addition, self-administered questionnaires were used. Breathlessness was assessed by the MRC  
56  
57 140 breathlessness scale, which comprises five statements that range from 0 'no trouble with  
58  
59 141 breathlessness' to 5 'I am too breathless to leave the house' (24). The Numerical Rating Scale (NRS)

1  
2  
3 142 was used for assessing pain. Patients were asked to rate their mean pain intensities in the last seven  
4  
5 143 days, ranging from 0-10, with 0 indicating 'no pain' and 10 indicating 'the worst imaginable pain' (25).  
6  
7 144 The multidimensional Fatigue Inventory (MFI) is a 20-item metric for fatigue severity. It has 5  
8  
9 145 dimensions: general fatigue, physical fatigue, mental fatigue, reduced motivation and reduced activity.  
10  
11 146 Each item ranges from 1 'absence of fatigue' to 5 'severe fatigue'. A total score is calculated as the sum  
12  
13 147 of the subscale scores (20–100). Higher scores indicate higher levels of fatigue (26). The perceived  
14  
15 148 limitations in daily life were assessed using the PROMIS physical function shortform 8b. This survey  
16  
17 149 contains eight questions ranging from 1 'unable to do' to 5 'without any difficulty' (27). A web-based  
18  
19 150 scoring service was used to calculate T-scores (maximum score 60.1 and mean 50.0, corresponding to  
20  
21 151 the mean in the general population of the USA), whereas a higher scores indicates better physical  
22  
23 152 function (28). Anxiety and depression complaints were assessed with the Hospital Anxiety and  
24  
25 153 Depression Scale (HADS). A score  $\geq 8$  on either subscale was considered to be substantial anxiety or  
26  
27 154 depression symptoms (29). Post-traumatic stress was assessed using the Global Psychotrauma Screen  
28  
29 155 – Post Traumatic Stress Disorder (GPS-PTSD-5). The regular GPS consists of 22 items, item 1-5 can be  
30  
31 156 used to generate a GPS-PTSD-5 score (range 0-5), score  $\geq 3$  indicates PTSD (30). Cognitive functioning  
32  
33 157 was assessed using the Checklist for Cognitive consequences after ICU-admission (CLC-IC). The CLC-IC  
34  
35 158 consists of 10 items; higher scores indicate more cognitive problems experienced in daily life (range 0-  
36  
37 159 10). The CLC-IC is based on the CLCE-24 (31). Proactive coping skills were assessed at T3 with the  
38  
39 160 Utrecht Proactive Coping Scale (UPCC), which is a 21-item questionnaire scored on a 4-point scale  
40  
41 161 ranging from 'not competent at all' to 'competent'. The total score was the average for all item scores  
42  
43 162 (range 1–4), where higher scores indicate higher levels of proactive coping (32). Premorbid social- and  
44  
45 163 work situations were collected at T1.

#### 164 Statistical analyses

165 Results are reported as mean and standard deviation (SD) or median and interquartile range (IQR)  
166 depending on distribution. Recovery of participation levels over time were assessed with linear mixed-

1  
2  
3 167 effects model for repeated measures. Patient characteristics in the domains body function, activity  
4  
5 168 limitations, personal and social factors at T0 and and 1 month after admission in the rehabilitation  
6  
7 169 centre (T1) were added to separate models that also included time and the interaction between that  
8  
9  
10 170 covariate and time. Next, for illustrative purposes only, linear mixed-effects model analyses were  
11  
12 171 stratified according to patient characteristics that were significantly associated with the course of  
13  
14 172 recovery of participation levels to visualize different patterns of change over time. A  $p < 0.05$  was  
15  
16 173 considered as statistically significant. Statistical analyses were performed with IBM SPSS statistics 26.0  
17  
18  
19 174 (SPSS Inc. Chicago, IL).

20  
21  
22 17523  
24  
25 176 **Results**

26  
27 177 During the first COVID-19 wave between April 2 and June 30, 2020, 103 post-ICU patients were  
28  
29 178 admitted for inpatient rehabilitation. Of these, twenty-three patients were missed since this study was  
30  
31 179 part of clinical practice in a very dynamic period and 13 patients were excluded excluded for reasons  
32  
33 180 given in figure 2. The study sample consisted of 67 patients (78% male) with a median age of 62 (IQR  
34  
35 181 57-68) and a median length of stay of 20 (12-33) days in the ICU and 19 (11-31) days inpatient  
36  
37 182 rehabilitation (Table 1). Overall, an improvement in muscle strength and functional exercise capacity  
38  
39 183 (6MWT) was found, whereas fatigue complaints and perceived limitations in daily life seem to decrease  
40  
41 184 in the first year after ICU discharge (Table 1).

42  
43  
44  
45  
46 185 Participation restrictions improved in the first year after ICU discharge due to a COVID-19 infection  
47  
48 186 (Figure 3). Mean participation levels increased from 62.0 (95%CI 55.9-68.1), 76.5 (95%CI 71.9-81.1) to  
49  
50 187 86.1 (95%CI 80.6-91.6) at one, three and 12 months respectively. One year after ICU discharge, 50.8%  
51  
52 188 of the patients still reported restrictions in physical exercise, 45.8% in performing housekeeping and  
53  
54 189 28.8% in performing leisure activities. After one year work is not applicable in 42.4% of all patients,  
55  
56 190 which is comparable to the premorbid work situation, where 58% of all patients were employed. One  
57  
58 191 year after ICU discharge 28.8% of all patients still reported restrictions in work/education. Taking into

192 account the patients who were not working pre-illness, means that 50% of the pre-illness working  
 193 patients had not fully resumed work after one year (Table 1).

| Table 1                                                            | T0           | One month (T1)  | Three months (T2) | Twelve months (T3) |
|--------------------------------------------------------------------|--------------|-----------------|-------------------|--------------------|
| <b>Baseline characteristics</b>                                    |              |                 |                   |                    |
| Age, years; n=67; median (IQR)                                     | 62 (57 – 68) | -               |                   |                    |
| <b>Sex; n=67; No (%)</b>                                           |              |                 |                   |                    |
| - Men                                                              | 52 (77.6%)   | -               |                   |                    |
| - Women                                                            | 15 (22.5%)   | -               |                   |                    |
| <b>Highest level of education; n=62; No (%)</b>                    |              |                 |                   |                    |
| - Lower education                                                  | 42 (67.7%)   | -               |                   |                    |
| - Higher education                                                 | 20 (32.3%)   | -               |                   |                    |
| <b>Work situation; n=62; No (%)</b>                                |              |                 |                   |                    |
| - Full-time job                                                    | 26 (41.9%)   | -               |                   |                    |
| - Parttime job                                                     | 10 (16.1%)   | -               |                   |                    |
| - Retired                                                          | 18 (29.0%)   | -               |                   |                    |
| - Not working otherwise                                            | 8 (12.9%)    | -               |                   |                    |
| <b>Comorbidities; n=67; no (%)</b>                                 |              |                 |                   |                    |
| - Asthma / bronchitis                                              | 6 (9.0%)     | -               |                   |                    |
| - Chronic obstructive pulmonary disease                            | 4 (6.0%)     | -               |                   |                    |
| - Obstructive sleep apnoea syndrome                                | 12 (17.9%)   | -               |                   |                    |
| - Diabetes Mellitus                                                | 12 (17.9%)   | -               |                   |                    |
| - Hypertension                                                     | 23 (34.3%)   | -               |                   |                    |
| - Cardiovascular disease                                           | 21 (31.3%)   | -               |                   |                    |
| - Chronic kidney disease                                           | 5 (7.4%)     | -               |                   |                    |
| - Depression                                                       | 4 (6.0%)     | -               |                   |                    |
| - None of the above comorbidities                                  | 25 (37.3%)   | -               |                   |                    |
| <b>Parameters related to severity critical illness</b>             |              |                 |                   |                    |
| - Duration intensive care unit, in days; n=59; median (IQR)        | 20 (12 – 33) | -               |                   |                    |
| - Invasive mechanical ventilation; n=67; No (%)                    | 58 (86.6%)   | -               |                   |                    |
| - Duration IMV, in days; n=55; median (IQR)                        | 17 (9 – 24)  | -               |                   |                    |
| - Presence of ICU-acquired weakness, n=61; No (%)                  | 45 (73.8%)   | -               |                   |                    |
| <b>Duration inpatient rehabilitation, days; n=67; median (IQR)</b> | 19 (11 – 31) |                 |                   |                    |
| <b>Coping style (UPCC); n=58; mean (SD)</b>                        | 3.0 (0.2)    |                 |                   |                    |
| <b>USER-P restriction subscale <sup>a</sup></b>                    |              |                 |                   |                    |
| - Work/education                                                   | -            | 64.4%           | 60.6%             | 28.8%              |
| - Housekeeping                                                     | -            | 74.6%           | 65.2%             | 45.8%              |
| - Mobility                                                         | -            | 59.3%           | 43.9%             | 16.9%              |
| - Physical exercise                                                | -            | 79.7%           | 60.6%             | 50.8%              |
| - Going out                                                        | -            | 45.8%           | 24.2%             | 10.2%              |
| - Outdoor activities                                               | -            | 54.2%           | 36.4%             | 16.9%              |
| - Leisure activities                                               | -            | 42.4%           | 28.8%             | 20.3%              |
| - Partner relationship                                             | -            | 28.8%           | 24.2%             | 16.9%              |
| - Visits to family/friends                                         | -            | 45.8%           | 31.8%             | 10.2%              |
| - Visits from family/friend                                        | -            | 32.2%           | 13.6%             | 8.5%               |
| - Telephone/PC contact                                             | -            | 15.3%           | 13.6%             | 11.9%              |
| <b>Physical examination:</b>                                       |              |                 |                   |                    |
| - Muscle strength                                                  |              |                 |                   |                    |
| - Mean muscle force (HHD), mean (SD)                               | -            | 75.7% (15.3)    | 93.5% (24.6)      | 101.4% (15.3)      |
| - 6MWT; mean (SD)                                                  | -            | 467.8m (91.2)   | 518.3m (102.5)    | 531.0m (86.5)      |
| - percentage of predicted                                          | -            | 69.5% (13.7)    | 76.9% (13.7)      | 79.2% (10.4)       |
| - Pulmonary function; mean (SD)                                    |              |                 |                   |                    |
| - FEV1                                                             | -            | 87.5% (15.8)    | 93.8% (19.9)      | 93.6% (17.7)       |
| - FVC                                                              | -            | 85.9% (16.3)    | 92.8% (18.7)      | 92.2% (15.6)       |
| - FEV1/FVC ratio                                                   | -            | 79.6% (9.1)     | 77.3% (10.6)      | 79.1% (11.2)       |
| <b>Self-administered questionnaires:</b>                           |              |                 |                   |                    |
| - Breathlessness (MRC); median (IQR)                               | -            | 2.0 (1.0 – 3.0) | 1.0 (1.0 – 2.0)   | 1.0 (1.0 – 2.0)    |
| - Pain (NRS); median (IQR)                                         | -            | 2.0 (1.0 - 3.5) | 2.0 (1.5 – 5.0)   | 2.0 (1.0 – 3.0)    |
| - Fatigue (MFI); mean (SD)                                         | -            | 58.6 (14.0)     | 56.0 (15.3)       | 50.8 (17.6)        |
| - perceived limitations in daily life (PROMIS 8b); mean (SD)       | -            | 34.8 (7.4)      | 39.2 (6.9)        | 44.8 (8.0)         |
| - Anxiety (HADS-anxiety); median (IQR)                             | -            | 3.0 (1.0 – 5.0) | 3.0 (1.0 - 6.0)   | 2.0 (0.5 – 6.0)    |
| - Exceeded anxiety cut-off ≥8                                      | -            | 7/57 (12.3%)    | 11/66 (16.7%)     | 10/59 (16.9%)      |
| - Depression (HADS depression); median (IQR)                       | -            | 2.0 (1.5 – 6.0) | 3.0 (1.0 – 6.0)   | 2.0 (1.0 – 4.0)    |
| - Exceeded depression cut-off ≥8                                   | -            | 10/59 (16.9%)   | 13/66 (19.7%)     | 10/59 (16.9%)      |
| - Post-traumatic stress (GPS-PTSD-5); median (IQR)                 | -            | 0.0 (0.0 – 1.0) | 0.0 (0.0 – 1.0)   | 0.0 (0.0 – 1.0)    |
| - Exceeded PTSD cut-off ≥3                                         | -            | 5/59 (8.5%)     | 8/66 (12.1%)      | 3/59 (5.1%)        |
| - Cognitive impairments (CLC-IC); median (IQR)                     | -            | 3.0 (1.0 – 6.0) | 4.0 (1.0 – 7.0)   | 2.0 (0.0 – 7.0)    |



1  
2  
3 194 Table 1, overview of the baseline characteristics (T0) and the physical examination and self-administered questionnaires at T1, T2 and T3. Low educational level  
4 195 was determined as 'primary and secondary education and post-secondary school'. High educational level was determined as 'bachelor's degree, master's degree  
5 196 or doctorate or equivalent'. Abbreviations: IMV, Invasive mechanical ventilation; UPCC, Utrecht Proactive Coping Scale; USER-P, Utrecht Scale for Evaluation of  
6 197 Rehabilitation-Participation; HHD, handheld dynamometer; 6MWT, 6 minute walking test; FEV1, Forced expiratory volume in the first second; FVC, Forced vital  
7 198 capacity; n.a., not applicable; MFI, multidimensional Fatigue Inventory; HADS, Hospital Anxiety and Depression Scale; GPS, The Global Psychotrauma Screen; CLC-  
8 199 IC, Checklist for Cognitive consequences after an ICU-admission. \* Restriction items values are percentages of patients who are restricted or dissatisfied.

8 200

9 201 Regarding the second aim, in the ICF domain body functions, breathlessness (MRC breathlessness),  
10 202 regression coefficient: 0.60 (95%CI 0.23-0.97; p-value <0.01) and fatigue (MFI), regression coefficient:  
11 203 0.07 (95%CI 0.03-0.09; p-value <0.01) were the only physical variables that influenced participation  
12 204 recovery over time. For the ICF domain activities, perceived limitations in daily life (PROMIS 8b)  
13 205 showed a different pattern in the recovery of participation restriction levels, regression coefficient: -  
14 206 0.11 (95%CI -0.12 to -0.05; p-value <0.01). In addition, personal factors like coping style (UPCC)  
15 207 regression coefficient: -2.39 (95%CI -4.20 to -0.06; p-value 0.01), anxiety (HADS anxiety) regression  
16 208 coefficient: 0.17 (95%CI 0.02-0.31; p-value 0.03) and depression (HADS depression) regression  
17 209 coefficient: 0.19 (95%CI 0.07-0.31; p-value <0.01) showed different paths in resuming the level of  
18 210 participation over time. Other early determinants show no significant difference in the recovery of  
19 211 participation (Table 2).

20 212

213

| Table 2                                         | Estimate (95% CI)     | p-value |
|-------------------------------------------------|-----------------------|---------|
| <b>Baseline characteristics</b>                 |                       |         |
| Age                                             | -0.03 (-0.08 – 0.02)  | 0.29    |
| Sex                                             | 0.72 (-0.32 – 1.76)   | 0.17    |
| Number of comorbidities                         | 0.04 (-0.34 – 0.42)   | 0.83    |
| Duration of inpatient rehabilitation            | 0.03 (-0.00 – 0.06)   | 0.07    |
| Coping style (UPCC)                             | -2.39 (-4.20 – -0.06) | 0.01*   |
| <b>ICU-stay specific parameters</b>             |                       |         |
| Length of ICU stay                              | 0.02 (-0.01 – 0.06)   | 0.21    |
| Duration of invasive mechanical ventilation     | 0.02 (-0.02 – 0.05)   | 0.37    |
| ICU-acquired weakness                           | -0.23 (-1.31 – 0.85)  | 0.67    |
| <b>Physical examination</b>                     |                       |         |
| Muscle strength                                 |                       |         |
| - Mean muscle force (HHD)                       | -0.02 (-0.06 – 0.01)  | 0.18    |
| 6MWT                                            | -0.00 (-0.01 – 0.01)  | 0.65    |
| Pulmonary function                              |                       |         |
| - FEV1                                          | -0.02 (-0.06 – 0.01)  | 0.16    |
| - FVC                                           | -0.03 (-0.06 – 0.00)  | 0.07    |
| - FEV1/FVC ratio                                | 0.04 (-0.02 – 0.09)   | 0.24    |
| <b>Self-administered questionnaires</b>         |                       |         |
| Breathlessness (MRC)                            | 0.60 (0.23 – 0.97)    | < 0.01* |
| Pain (NRS)                                      | -0.03 (-0.28 – 0.23)  | 0.84    |
| Fatigue (MFI)                                   | 0.07 (0.03 – 0.09)    | < 0.01* |
| Perceived limitations in daily life (PROMIS 8b) | -0.11 (-0.12 – -0.05) | < 0.01* |
| Anxiety (HADS-anxiety)                          | 0.17 (0.02 – 0.31)    | 0.03*   |
| Depression (HADS depression)                    | 0.19 (0.07 – 0.31)    | < 0.01* |
| Post-traumatic stress (GPS-PTSD-5)              | 0.24 (-0.21 – 0.70)   | 0.30    |
| Cognitive impairments (CLC-IC)                  | 0.09 (-0.07 – 0.24)   | 0.27    |

Table 2; linear mixed model for covariates at T0 or T1, as an interaction between covariate and time (1, 3, and 12 months), for the recovery of participation levels. \* p < 0.05. Abbreviations: UPCC, Utrecht Proactive Coping Scale; HHD, handheld dynamometer; 6MWT, 6 minute walking test; FEV1, Forced expiratory volume in the first second; FVC, Forced vital capacity; MFI, multidimensional Fatigue Inventory; HADS, Hospital Anxiety and Depression Scale; GPS, The Global Psychotrauma Screen; CLC-IC, Checklist for Cognitive consequences after an ICU-admission.

214  
215  
216  
217  
218  
219  
220  
221 Participation levels increased significantly between 1 and 3 months and between 3 and 12 months in  
222 patients who reported more breathlessness, more fatigue or more limitations in daily life and those  
223 with a passive coping style. In contrast, patients with less breathlessness, fewer fatigue complaints,  
224 fewer restrictions in daily life and a pro-active coping style showed no significant increase between 3  
225 and 12 months (Figure 4). For patients with HADS anxiety score  $\geq 8$ , no differences were found in  
226 participation levels in the first 3 months, while there was significant difference in recovery of  
227 participation levels between 3 and 12 months. However, for patients with fewer anxiety complaints  
228 (HADS anxiety score  $\leq 8$ ) participation levels significantly improved between 1 and 3 months and

1  
2  
3 229 between 3 and 12 months. For depressive symptoms, both groups improved significantly in  
4  
5 230 participation levels between 1 to 3 months and between 3 to 12 months, although a steeper curve is  
6  
7 231 seen in recovery of participation levels at 3 to 12 months in patients with more depressive symptoms.  
8  
9

10 232

11 233

12 234 **Discussion**

13  
14  
15 235 In this prospective cohort study, recovery of participation during the first year after ICU discharge in  
16  
17 236 COVID-19 ICU survivors who needed inpatient rehabilitation was evaluated and the association  
18  
19 237 between early levels of body function impairments, activity limitations and personal and social factors  
20  
21 238 on recovery were estimated. It is seen that in the first year after ICU discharge patients were able to  
22  
23 239 improve their participation levels. Nevertheless, after one year, there are still important limitations in  
24  
25 240 daily life, mainly in resuming work, physical exercise, housekeeping and leisure activities. As early  
26  
27 241 determinants for a delay in the resumption of patient's habitual level of participation levels over the  
28  
29 242 first year, higher levels of self-experienced breathlessness and fatigue complaints, more perceived  
30  
31 243 limitations in daily life as well as personal factors (having a passive coping style, anxiety complaints or  
32  
33 244 depression complaints) were found.  
34  
35  
36  
37

38 245 In previous Dutch studies focusing on overall post-ICU COVID-19 survivors, an average age of 61-63  
39  
40 246 was found, 69-72% men, with a median length of stay of 18-20 days in the ICU (33,34). These  
41  
42 247 demographic data seem to correspond with findings of current study, taking into account that in the  
43  
44 248 first COVID-19 wave, 83% of all post-ICU COVID-19 patients were transferred to a rehabilitation centre  
45  
46 249 (34). Heesakker et al. reported that in patients who survived one year following ICU treatment for  
47  
48 250 COVID-19, physical, mental, or cognitive symptoms were often reported (33). This corresponds with  
49  
50 251 the findings of the current study, whereas various physical, mental and cognitive impairments were  
51  
52 252 seen one year after ICU admission. However, to our knowledge, this is the first study to report  
53  
54 253 differences in the resumption of participation levels in post-ICU COVID-19 patients. Mean participation  
55  
56 254 levels increased to 86.1 one year after ICU discharge. As a reference, in other non-COVID patients (i.e.  
57  
58  
59  
60

1  
2  
3 255 stroke, acquired brain injury, progressive neurologic diseases, spinal cord injury and acute coronary  
4  
5 256 syndrome), participation levels between 70.6-83.5 have been observed (35–37). In all non-COVID  
6  
7 257 patient groups, patients mainly reported restrictions in work/education, housekeeping, physical  
8  
9  
10 258 exercise and performing leisure activities, which is in accordance with restrictions in participation  
11  
12 259 reported in current study (36,37).

13  
14 260 Moreover, these results showed that higher scores of self-experienced breathlessness or fatigue and  
15  
16 261 more perceived limitations in daily life in the early phase of rehabilitation were associated with a  
17  
18 262 delayed recovery of participation levels over the first year. Furthermore, patients with a less active  
19  
20 263 coping style, those that were more anxious or reported to perceive more depressive complaints had a  
21  
22 264 delayed recovery of their level of participation over the first year. For all these determinants,  
23  
24 265 participation levels also appeared to be lower in the early phase of rehabilitation. These findings  
25  
26 266 indicate that patients with a higher level of anxiety and those with a higher level of depression had a  
27  
28 267 significantly slower improvement in participation levels during the first months, followed by a more  
29  
30 268 progressive recovery, especially in the last months. In addition, patients with more breathlessness  
31  
32 269 complaints, more fatigue complaints or more perceived limitations in daily life in the early phase of  
33  
34 270 rehabilitation and patients with a passive coping style showed a more progressive recovery of  
35  
36 271 participation levels especially in the last months. Poor baseline situation may also have provided more  
37  
38 272 opportunity to improve. However, with a mean participation restriction level of 86.1 one year after  
39  
40 273 ICU discharge, the maximum score of 100 of the USER-P restriction subscale has not been reached.

41  
42 274 Complaints of fatigue or breathlessness may be due to underlying medical problems or to the  
43  
44 275 contribution of personal factors. Previous study's showed significant recovery of respiratory function  
45  
46 276 and physical performance in the first year after ICU discharge due to COVID-19. Nevertheless, patients  
47  
48 277 still experience breathlessness and fatigue complaints after one year (38,39). Another finding in  
49  
50 278 current study was that early determinants related to the severity of the COVID-19 infection period  
51  
52 279 itself (such as ICU stay-specific parameters and physical parameters as age, sex, muscle strength,  
53  
54 280 functional exercise capacity and pulmonary function) did not individually explain progress in recovery  
55  
56  
57  
58  
59  
60

1  
2  
3 281 of participation over time. Contrary to expectations, this may indicate that non-physical factors such  
4  
5 282 as coping style, subjectively experienced physical impairments (including fatigue and breathlessness)  
6  
7 283 and mental health issues (such as anxiety and depressive symptoms) seem more important to  
8  
9  
10 284 determine progress in recovering the level of participation. Previous literature on post-ICU patients  
11  
12 285 indicated that critical care recovery has focused on post-ICU impairments experienced by patients.  
13  
14 286 Whereas the positive aspects of recovery within the rehabilitation phase, including coping style and  
15  
16 287 resilience seems to be ignored (40,41). Resilience refers to the ability to face the challenges and  
17  
18 288 difficulties of life in a positive and adaptive manner, as well as the capacity to recover from an adverse  
19  
20  
21 289 event (42). Higher levels of resilience have been linked to improved mental and physical health (43). It  
22  
23 290 is possible to improve the level of resilience. Which implies that resilience can be used to improve  
24  
25 291 (emotional) well-being, with the possible consequence of improving participation levels.  
26  
27  
28 292

### 29 293 Implications for clinical practice and further research

30  
31  
32 294 This study underlines the importance of looking at long-term consequence of COVID-19 ICU survivors  
33  
34 295 with an integral vision of health. Whether identical variables can be used to identify a delay in recovery  
35  
36 296 in patients who had a milder infection is currently still unclear. In this study, conclusions can be made  
37  
38 297 for a selected group (with ICU admission) of patients. Extrapolation to other populations needs to be  
39  
40  
41 298 done with caution. Early detection of a passive coping style or mental impairments seems important  
42  
43 299 and should therefore be included in screening during early multidisciplinary rehabilitation. Further  
44  
45 300 research is needed to study the effect of early screening of a patients' level of coping/ resilience during  
46  
47  
48 301 the first months after ICU discharge. As a consequence, an early intervention to increase  
49  
50 302 resilience/strengthen coping on indication could be promising to further strengthen social  
51  
52 303 participation, but needs to be further studied.  
53

54 304

### 55 56 305 Strengths and limitations

1  
2  
3 306 A strength of the study is that it only included the most severely affected post-ICU COVID-19 patients  
4  
5 307 referred to inpatient rehabilitation. In addition, this study used physical examination as well as  
6  
7 308 questionnaires, which means there was a combination of objective and subjective measurements. It is  
8  
9  
10 309 notable that even in the most severely affected COVID-19 patients delayed recovery of participation is  
11  
12 310 associated with self-experienced physical impairments, mental impairments and coping style.  
13  
14 311 Nevertheless, some limitations of the current study need to be considered. First, sample size is limited  
15  
16 312 and a number of factors were studied for their effect on the course of participation recovery. The  
17  
18 313 limited sample size contributed to relatively wide confidence intervals. The risk of type II error should  
19  
20 314 therefore be considered while interpreting the data. A post-hoc power calculation revealed however  
21  
22 315 that the study had 90% power to detect an effect size of 0.2 for changes in participation levels over  
23  
24 316 time ( $\alpha = 0.05$ , mean correlation between repeated measures = 0.53). Still, p-values of the multiple  
25  
26 317 tests of association should be interpreted cautiously, because we cannot exclude erroneous  
27  
28 318 interpretations of statistical significant findings (i.e. type I error). However, since our results support a  
29  
30 319 certain pattern, we believe that the main conclusions of this study are solid. Second, number of  
31  
32 320 variables available to describe the acute illness severity were limited. Patients referred for inpatient  
33  
34 321 multidisciplinary rehabilitation were included in this study. Generalisation of the results to all ICU  
35  
36 322 survivors needs to be performed with caution, and needs further study. Third, due to high workload  
37  
38 323 on the ward, 23 patients were not approached in time for consent to participate. In our opinion, this  
39  
40 324 is unlikely to have led to selection bias, but this cannot be excluded. Finally, the lockdown and the  
41  
42 325 inability to perform social and outdoor activities may have affected the total USER-P score as this scale  
43  
44 326 allows the rating of 'not applicable'. Since the study- and lockdown period were similar for all patients,  
45  
46 327 we expect no difference in the study patients. Although it may have affected the recovery course of  
47  
48 328 participation recovery for the entire patient group, it is not expected to have affected the predictors.  
49  
50  
51  
52  
53  
54  
55  
56  
57  
58  
59  
60

### 330 Conclusion

1  
2  
3 331 For patients admitted to an ICU for COVID-19, participation levels improves in the first year after ICU  
4  
5 332 discharge. However, at one year after discharge, many patients still experience limitations in daily life,  
6  
7 333 mainly in resuming work, physical exercise, housekeeping and leisure activities. Our results indicate  
8  
9 334 that progress of recovery in participation in the first year after discharge is associated with early  
10  
11 335 determinants in coping style, subjectively experienced physical impairments (breathlessness and  
12  
13 336 fatigue) and mental impairments (anxiety and depression) rather than medical variables. This study  
14  
15 337 supports the need for an integral perspective on health to facilitate the identification of factors that  
16  
17 338 delay the recovery trajectory for participation in the first year after ICU discharge. Personal factors  
18  
19 339 such as a passive coping style and more anxiety- or depression complaints seem relevant to this.  
20  
21 340 Rehabilitation care needs to anticipate on these topics, starting in the early rehabilitation phase of  
22  
23 341 post-ICU COVID-19 care.  
24  
25  
26  
27  
28  
29  
30  
31

32 344 Acknowledgements: We would like to thank all physiotherapist and students for their valuable  
33  
34 345 contribution for collecting all data. We also thank all participants.  
35  
36

37 346 Author contributors: CW, JV, BH and SJSS were responsible for the study design. The statistical analysis  
38  
39 347 plan was designed by CW, SJSS and SvK. Statistical analysis was done by CW, with control of SJSS and  
40  
41 348 SvK. Practical implication was done by CW, SvS and YH. The first draft of the paper was written by CW  
42  
43 349 and all co-authors reviewed and approved it for submission. CW and JV are the guarantors. The  
44  
45 350 corresponding author attests that all listed authors meet authorship criteria and that no others  
46  
47 351 meeting the criteria have been omitted.  
48  
49  
50

51 352 Funding: This research received no specific grant from any funding agency in the public, commercial or  
52  
53 353 not-for-profit sectors.  
54  
55

56 354 Competing interests: All authors have completed the ICMJE uniform disclosure form at  
57  
58 355 <http://www.icmje.org/disclosure-of-interest/> and declare: no support from any organisation for the  
59  
60

1  
2  
3 356 submitted work; no financial relationships with any organisations that might have an interest in the  
4  
5 357 submitted work in the past three years; no other relationships or activities that could appear to have  
6  
7 358 influenced the submitted work  
8  
9

10 359 Patient consent for publication: Not required.  
11  
12

13 360 Dissemination to participants and related patient and public communities: The study results will be  
14  
15 361 disseminated to the public through our media channels or national and international conferences.  
16  
17

18 362 Ethical approval: The local medical ethics committee Zuyderland METC (METCZ20200086) approved  
19  
20 363 the study.  
21  
22

23 364 Data availability statement: To guarantee the confidentiality of personal and health information, only  
24  
25 365 the authors have had access to the data during the study. Data is available (anonymised), but the  
26  
27 366 corresponding author must be contacted to request these data. Data will be kept for 15 years  
28  
29  
30

31 367 Open access: This is an open access article distributed in accordance with the Creative Commons  
32  
33 368 Attribution Non Commercial (CC BY-NC 4.0) license, which permits others to distribute, remix, adapt,  
34  
35 369 build upon this work non-commercially, and license their derivative works on different terms, provided  
36  
37 370 the original work is properly cited, appropriate credit is given, any changes made indicated, and the  
38  
39 371 use is non-commercial  
40  
41  
42

43 372  
44

45 373 ORCID ID: Carolina Wiertz <https://orcid.org/0000-0002-7703-2508>  
46  
47

48 374  
49  
50  
51  
52  
53  
54  
55  
56  
57  
58  
59  
60



1  
2  
3 375 **References**

- 4  
5 376 1. RIVM. Actuele informatie over het nieuwe coronavirus (COVID-19) [Internet]. 22-05-2020.  
6  
7 377 Available from: <https://www.rivm.nl/coronavirus-covid-19/actueel>  
8  
9  
10 378 2. NICE. COVID-19 infecties op de IC's [Internet]. Nationale Intensive Care Evaluatie. [cited 2020  
11  
12 379 Jul 2]. Available from: [https://www.stichting-nice.nl/COVID\\_rapport.pdf](https://www.stichting-nice.nl/COVID_rapport.pdf)  
13  
14  
15 380 3. Tan E, Song J, Deane AM, Plummer MP. Global Impact of Coronavirus Disease 2019 Infection  
16  
17 381 Requiring Admission to the ICU: A Systematic Review and Meta-analysis. *Chest*. 2021;  
18  
19  
20 382 4. Needham DM, Davidson J, Cohen H, Hopkins RO, Weinert C, Wunsch H, et al. Improving long-  
21  
22 383 term outcomes after discharge from intensive care unit: Report from a stakeholders'  
23  
24 384 conference. *Crit Care Med*. 2012 Feb;40(2):502–9.  
25  
26  
27 385 5. Dowdy DW, Eid MP, Sedrakyan A, Mendez-Tellez PA, Pronovost PJ, Herridge MS, et al. Quality  
28  
29 386 of life in adult survivors of critical illness: A systematic review of the literature. Vol. 31,  
30  
31 387 *Intensive Care Medicine*. Springer Verlag; 2005. p. 611–20.  
32  
33  
34 388 6. Desai S V., Law TJ, Needham DM. Long-term complications of critical care. *Critical Care*  
35  
36 389 *Medicine*. 2011.  
37  
38  
39 390 7. Ohtake PJ, Lee AC, Scott JC, Hinman RS, Ali NA, Hinkson CR, et al. Physical impairments  
40  
41 391 associated with post-intensive care syndrome: Systematic review based on the world health  
42  
43 392 organization's international classification of functioning, disability and health framework.  
44  
45 393 *Physical Therapy*. 2018.  
46  
47  
48 394 8. Wiertz CMH, Vints WAJ, Maas GJCM, Rasquin SMC, van Horn YY, Dremmen MPM, et al.  
49  
50 395 COVID-19: patient characteristics in the first phase of post-intensive care rehabilitation. *Arch*  
51  
52 396 *Rehabil Res Clin Transl*. 2021;  
53  
54  
55 397 9. Martillo MA, Dangayach NS, Tabacof L, Spielman LA, Dams-O'Connor K, Chan CC, et al.  
56  
57 398 *Postintensive Care Syndrome in Survivors of Critical Illness Related to Coronavirus Disease*  
58  
59  
60

- 1  
2  
3 399 2019: Cohort Study from a New York City Critical Care Recovery Clinic\*. Crit Care Med. 2021;  
4  
5  
6 400 10. Rousseau AF, Minguet P, Colson C, Kellens I, Chaabane S, Delanaye P, et al. Post-intensive care  
7  
8 401 syndrome after a critical COVID-19: cohort study from a Belgian follow-up clinic. Ann Intensive  
9  
10 402 Care. 2021;  
11  
12  
13 403 11. Leite VF, Rampim DB, Jorge VC, de Lima M do CC, Cezarino LG, da Rocha CN, et al. Persistent  
14  
15 404 Symptoms and Disability After COVID-19 Hospitalization: Data From a Comprehensive  
16  
17 405 Telerehabilitation Program. Arch Phys Med Rehabil. 2021;  
18  
19  
20 406 12. Veenendaal N van, van der Meulen IC, Onrust M, Paans W, Dieperink W, van der Voort PHJ.  
21  
22 407 Six-month outcomes in covid-19 icu patients and their family members: A prospective cohort  
23  
24 408 study. Healthc. 2021;  
25  
26  
27  
28 409 13. FMS. COVID-19 [Internet]. 2022. Available from: [https://richtlijndatabase.nl/richtlijn/covid-](https://richtlijndatabase.nl/richtlijn/covid-19/startpagina_-_covid-19.html)  
29  
30 410 [19/startpagina\\_-\\_covid-19.html](https://richtlijndatabase.nl/richtlijn/covid-19/startpagina_-_covid-19.html)  
31  
32  
33 411 14. (WHO) WHO. The international Classification of Functioning, Disability and Health - ICF  
34  
35 412 [Internet]. 2001. Available from: [https://www.who.int/classifications/international-](https://www.who.int/classifications/international-classification-of-functioning-disability-and-health)  
36  
37 413 [classification-of-functioning-disability-and-health](https://www.who.int/classifications/international-classification-of-functioning-disability-and-health)  
38  
39  
40 414 15. de Graaf J, Brouwers M, Post M. Behandelprogramma COVID-19 post-IC in de Medisch  
41  
42 415 Specialistische Revalidatie (De Hoogstraat). Utrecht, The Netherlands; 2020.  
43  
44  
45 416 16. Post MWM, Van Der Zee CH, Hennink J, Schafrat CG, Visser-Meily JMA, Van Berlekom SB.  
46  
47 417 Validity of the utrecht scale for evaluation of rehabilitation- participation. Disabil Rehabil.  
48  
49 418 2012;  
50  
51  
52  
53 419 17. Van Der Zee CH, Visser-Meily JMA, Lindeman E, Kappelle LJ, Post MWM. Participation in the  
54  
55 420 chronic phase of stroke. Top Stroke Rehabil. 2013;  
56  
57  
58 421 18. Vanpee G, Segers J, Van Mechelen H, Wouters P, Van Den Berghe G, Hermans G, et al. The  
59  
60

- 1  
2  
3 422 interobserver agreement of handheld dynamometry for muscle strength assessment in  
4  
5 423 critically ill patients. *Crit Care Med*. 2011;  
6  
7  
8 424 19. Andrews AW, Thomas MW, Bohannon RW. Normative values for isometric muscle force  
9  
10 425 measurements obtained with hand-held dynamometers. *Phys Ther*. 1996;76(3):248–59.  
11  
12  
13 426 20. Bohannon RW. Reference values for extremity muscle strength obtained by hand-held  
14  
15 427 dynamometry from adults aged 20 to 79 years. *Arch Phys Med Rehabil*. 1997;78(1):26–32.  
16  
17  
18 428 21. Chan KS, Pfoh ER, Denehy L, Elliott D, Holland AE, Dinglas VD, et al. Construct validity and  
19  
20 429 minimal important difference of 6-minute walk distance in survivors of acute respiratory  
21  
22 430 failure. *Chest*. 2015;  
23  
24  
25 431 22. Troosters T, Gosselink R, Decramer M. Six minute walking distance in healthy elderly subjects.  
26  
27 432 *Eur Respir J*. 1999;  
28  
29  
30 433 23. Graham BL, Steenbruggen I, Barjaktarevic IZ, Cooper BG, Hall GL, Hallstrand TS, et al.  
31  
32 434 Standardization of spirometry 2019 update an official American Thoracic Society and  
33  
34 435 European Respiratory Society technical statement. *American Journal of Respiratory and*  
35  
36 436 *Critical Care Medicine*. 2019.  
37  
38  
39 437 24. Stenton C. The MRC breathlessness scale. *Occup Med (Lond)*. 2008;  
40  
41  
42 438 25. Williamson A, Hoggart B. Pain: A review of three commonly used pain rating scales. *Journal of*  
43  
44 439 *Clinical Nursing*. 2005.  
45  
46  
47 440 26. Smets EMA, Garssen B, Bonke B, De Haes JCJM. The multidimensional Fatigue Inventory (MFI)  
48  
49 441 psychometric qualities of an instrument to assess fatigue. *J Psychosom Res*. 1995;  
50  
51  
52 442 27. Feng D, Laurel F, Castille D, McCormick AKHG, Held S. Reliability, construct validity, and  
53  
54 443 measurement invariance of the PROMIS Physical Function 8b—Adult Short Form v2.0. *Qual*  
55  
56 444 *Life Res*. 2020;  
57  
58  
59  
60

- 1  
2  
3 445 28. HealthMeasures Scoring Service powered by Assessment CenterSM [Internet]. [cited 2021 Feb  
4  
5 446 20]. Available from: [https://www.assessmentcenter.net/ac\\_scoring-service](https://www.assessmentcenter.net/ac_scoring-service)  
6  
7  
8 447 29. Bjelland I, Dahl AA, Haug TT, Neckelmann D. The validity of the Hospital Anxiety and  
9  
10 448 Depression Scale: An updated literature review. *J Psychosom Res.* 2002;  
11  
12  
13 449 30. Olff M, Bakker A. Global Psychotrauma Screen (GPS); User guide september 2021 [Internet].  
14  
15 450 2016 [cited 2022 Feb 2]. Available from: <https://nl.global-psychotrauma.net/gps>  
16  
17  
18 451 31. van Heugten C, Rasquin S, Winkens I, Beusmans G, Verhey F. Checklist for cognitive and  
19  
20 452 emotional consequences following stroke (CLCE-24): Development, usability and quality of the  
21  
22 453 self-report version. *Clin Neurol Neurosurg.* 2007;  
23  
24  
25 454 32. Bode C, Thoolen B, Ridder D. Het meten van proactieve copingvaardigheden: Psychometrische  
26  
27 455 eigenschappen van de Utrechtse Proactieve Coping Competentie lijst (UPCC). *Psychol en*  
28  
29 456 *Gezondh.* 2008;  
30  
31  
32  
33 457 33. Heesakkers H, van der Hoeven JG, Corsten S, Janssen I, Ewalds E, Simons KS, et al. Clinical  
34  
35 458 Outcomes Among Patients With 1-Year Survival Following Intensive Care Unit Treatment for  
36  
37 459 COVID-19. *JAMA.* 2022;(January).  
38  
39  
40 460 34. van Gassel RJJ, Bels JLM, Raafs A, van Bussel BCT, van de Poll MCG, Simons SO, et al. High  
41  
42 461 prevalence of pulmonary sequelae at 3 months after hospital discharge in mechanically  
43  
44 462 ventilated survivors of COVID-19. *American Journal of Respiratory and Critical Care Medicine.*  
45  
46 463 2021.  
47  
48  
49  
50 464 35. Van Mierlo ML, Van Heugten CM, Post MWM, Hajós TRS, Kappelle LJ, Visser-Meily JMA.  
51  
52 465 Quality of life during the first two years post stroke: The Restore4Stroke cohort study.  
53  
54 466 *Cerebrovasc Dis.* 2016;  
55  
56  
57 467 36. de Graaf JA, van Mierlo ML, Post MWM, Achterberg WP, Kappelle LJ, Visser-Meily JMA. Long-  
58  
59 468 term restrictions in participation in stroke survivors under and over 70 years of age. *Disabil*

- 1  
2  
3 469 Rehabil. 2018;  
4  
5  
6 470 37. Mol TI, van Bennekom CA, Schepers VP, ter Hoeve N, Kruitwagen-van Reenen ET, Visser-Meily  
7  
8 471 JM, et al. Differences in Societal Participation Across Diagnostic Groups: Secondary Analyses  
9  
10 472 of 8 Studies Using the Utrecht Scale for Evaluation of Rehabilitation-Participation. Arch Phys  
11  
12 473 Med Rehabil. 2021;  
13  
14  
15 474 38. Gamberini L, Mazzoli CA, Prediletto I, Sintonen H, Scaramuzzo G, Allegri D, et al. Health-  
16  
17 related quality of life profiles, trajectories, persistent symptoms and pulmonary function one  
18 475 year after ICU discharge in invasively ventilated COVID-19 patients, a prospective follow-up  
19  
20 476 study. Respir Med. 2021;  
21  
22 477  
23  
24  
25 478 39. Bels JLM, van Gassel RJJ, Timmerman L, Hemmen B, van de Poll MCG, Peters NHGM, et al.  
26  
27 479 One year respiratory and functional outcomes of mechanically ventilated COVID-19 survivors:  
28  
29 480 A prospective cohort study. Am J Respir Crit Care Med. 2022;Online ahead of print.  
30  
31  
32 481 40. Maley JH, Brewster I, Mayoral I, Siruckova R, Adams S, McGraw KA, et al. Resilience in  
33  
34 survivors of critical illness in the context of the survivors' experience and recovery. Ann Am  
35 482 Thorac Soc. 2016;  
36  
37 483  
38  
39  
40 484 41. Haines KJ, Hibbert E, Leggett N, Boehm LM, Hall T, Bakhru RN, et al. Transitions of Care After  
41  
42 485 Critical Illness-Challenges to Recovery and Adaptive Problem Solving. Crit Care Med. 2021;  
43  
44  
45 486 42. Steinhardt M, Dolbier C. Evaluation of a resilience intervention to enhance coping strategies  
46  
47 487 and protective factors and decrease symptomatology. J Am Coll Heal. 2008;  
48  
49  
50 488 43. Schure MB, Odden M, Goins RT. The association of resilience with mental and physical health  
51  
52 489 among older american indians: The native elder care study. Am Indian Alaska Nativ Ment Heal  
53  
54 490 Res. 2013;  
55  
56  
57 491  
58  
59  
60

1  
2  
3 492 **Figure Legend:**  
4

- 5 493 - Figure 1: ICF model and measurement instruments used.  
6 494 - Figure 2: Subject recruitment flowchart.  
7 495 - Figure 3: The recovery of participation levels (USER-P restriction subscale) in the first year  
8 496 after ICU discharge in post-COVID-19 patients.  
9 497 - Figure 4: The influence of early levels of body function impairments, activity limitations and  
10 498 personal factors on the recovery of participation levels (USER-P restriction subscale).  
11  
12  
13  
14  
15  
16  
17  
18  
19  
20  
21  
22  
23  
24  
25  
26  
27  
28  
29  
30  
31  
32  
33  
34  
35  
36  
37  
38  
39  
40  
41  
42  
43  
44  
45  
46  
47  
48  
49  
50  
51  
52  
53  
54  
55  
56  
57  
58  
59  
60

For peer review only



Figure 1. ICF model and measurement instruments used.

Abbreviations: PICS, post intensive care syndrome; USER-P, Utrecht Scale for Evaluation of Rehabilitation-Participation; HHD, handheld dynamometer; MFI, multidimensional Fatigue Inventory; HADS, Hospital Anxiety and Depression Scale; GPS, The Global Psychotrauma Screen; CLC-IC, Checklist for Cognitive consequences after an ICU-admission; 6-MWT, 6-minute walk test; UPCC, Utrecht Proactive Coping Scale  
ICF, International Classification of Functioning, Disability and Health

338x164mm (96 x 96 DPI)



Figure 2; Subject recruitment flowchart.

179x181mm (96 x 96 DPI)



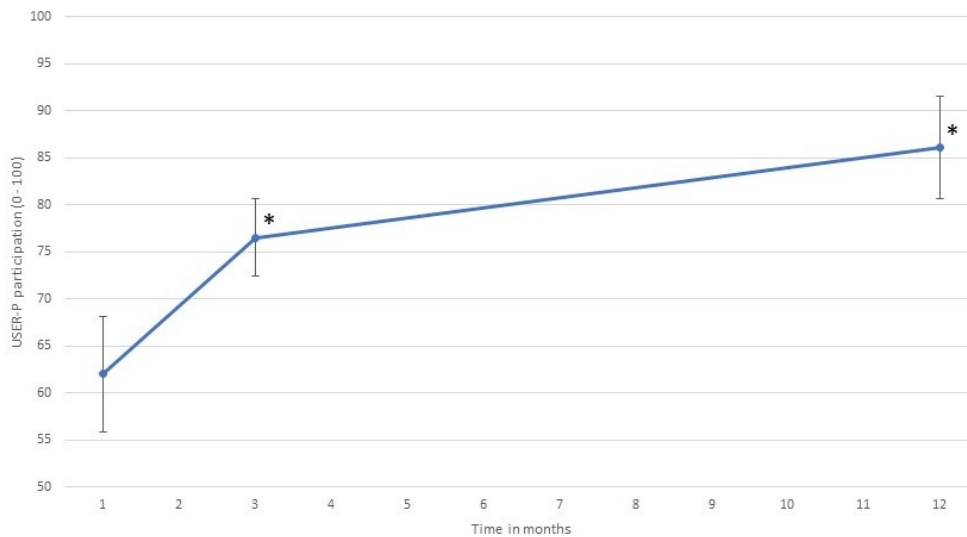

Figure 3; The recovery of participation levels (USER-P restriction subscale) in the first year after ICU discharge in post-COVID-19 patients. Results are expressed as mean with corresponding 95% confidence interval. \*  $p < 0.01$  (compared to previous measurement moment)

222x129mm (96 x 96 DPI)

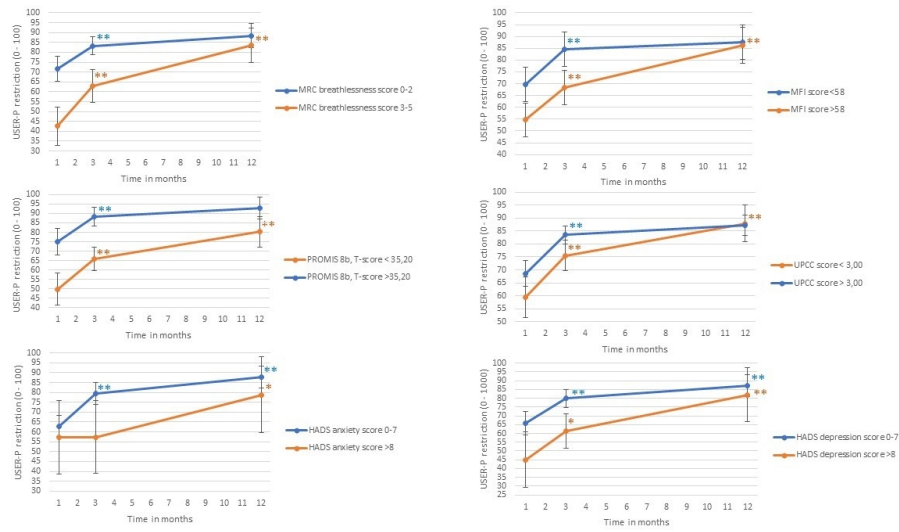

Figure 4; The influence of early levels of body function impairments, activity limitations and personal factors on the recovery of participation levels (USER-P restriction subscale). For illustrative purposes, subgroups have been created based on cut-off value (HADS) or the median if no specific cut-off value is known (MRC, MFI, PROMIS 8b, UPCC). Results are expressed as means with corresponding 95% confidence interval. \* p < 0.05 and \*\* p < 0.01 (compared to previous measurement moment).

338x177mm (96 x 96 DPI)

STROBE Statement—Checklist of items that should be included in reports of *cohort studies*

|                              | Item No | Recommendation                                                                                                                                                                                    | Page No   |
|------------------------------|---------|---------------------------------------------------------------------------------------------------------------------------------------------------------------------------------------------------|-----------|
| <b>Title and abstract</b>    | 1       | (a) Indicate the study's design with a commonly used term in the title or the abstract                                                                                                            | 1         |
|                              |         | (b) Provide in the abstract an informative and balanced summary of what was done and what was found                                                                                               | 2-3       |
| <b>Introduction</b>          |         |                                                                                                                                                                                                   |           |
| Background/rationale         | 2       | Explain the scientific background and rationale for the investigation being reported                                                                                                              | 4         |
| Objectives                   | 3       | State specific objectives, including any prespecified hypotheses                                                                                                                                  | 4         |
| <b>Methods</b>               |         |                                                                                                                                                                                                   |           |
| Study design                 | 4       | Present key elements of study design early in the paper                                                                                                                                           | 5         |
| Setting                      | 5       | Describe the setting, locations, and relevant dates, including periods of recruitment, exposure, follow-up, and data collection                                                                   | 5         |
| Participants                 | 6       | (a) Give the eligibility criteria, and the sources and methods of selection of participants. Describe methods of follow-up                                                                        | 5         |
|                              |         | (b) For matched studies, give matching criteria and number of exposed and unexposed                                                                                                               |           |
| Variables                    | 7       | Clearly define all outcomes, exposures, predictors, potential confounders, and effect modifiers. Give diagnostic criteria, if applicable                                                          | 5-7       |
| Data sources/<br>measurement | 8*      | For each variable of interest, give sources of data and details of methods of assessment (measurement). Describe comparability of assessment methods if there is more than one group              | 5-7       |
| Bias                         | 9       | Describe any efforts to address potential sources of bias                                                                                                                                         | 7         |
| Study size                   | 10      | Explain how the study size was arrived at                                                                                                                                                         | NA        |
| Quantitative variables       | 11      | Explain how quantitative variables were handled in the analyses. If applicable, describe which groupings were chosen and why                                                                      | 7         |
| Statistical methods          | 12      | (a) Describe all statistical methods, including those used to control for confounding                                                                                                             | 7         |
|                              |         | (b) Describe any methods used to examine subgroups and interactions                                                                                                                               |           |
|                              |         | (c) Explain how missing data were addressed                                                                                                                                                       |           |
|                              |         | (d) If applicable, explain how loss to follow-up was addressed                                                                                                                                    |           |
|                              |         | (e) Describe any sensitivity analyses                                                                                                                                                             |           |
| <b>Results</b>               |         |                                                                                                                                                                                                   |           |
| Participants                 | 13*     | (a) Report numbers of individuals at each stage of study—eg numbers potentially eligible, examined for eligibility, confirmed eligible, included in the study, completing follow-up, and analysed | 8<br>Fig2 |

|                          |     |                                                                                                                                                                                                                                                                                                                                                                                                                       |       |
|--------------------------|-----|-----------------------------------------------------------------------------------------------------------------------------------------------------------------------------------------------------------------------------------------------------------------------------------------------------------------------------------------------------------------------------------------------------------------------|-------|
|                          |     | (b) Give reasons for non-participation at each stage                                                                                                                                                                                                                                                                                                                                                                  |       |
|                          |     | (c) Consider use of a flow diagram                                                                                                                                                                                                                                                                                                                                                                                    |       |
| Descriptive data         | 14* | (a) Give characteristics of study participants (eg demographic, clinical, social) and information on exposures and potential confounders<br><br>(b) Indicate number of participants with missing data for each variable of interest<br><br>(c) Summarise follow-up time (eg, average and total amount)                                                                                                                | 8     |
| Outcome data             | 15* | Report numbers of outcome events or summary measures over time                                                                                                                                                                                                                                                                                                                                                        | 8     |
| Main results             | 16  | (a) Give unadjusted estimates and, if applicable, confounder-adjusted estimates and their precision (eg, 95% confidence interval). Make clear which confounders were adjusted for and why they were included<br><br>(b) Report category boundaries when continuous variables were categorized<br><br>(c) If relevant, consider translating estimates of relative risk into absolute risk for a meaningful time period | 8-11  |
| Other analyses           | 17  | Report other analyses done—eg analyses of subgroups and interactions, and sensitivity analyses                                                                                                                                                                                                                                                                                                                        | 8-11  |
| <b>Discussion</b>        |     |                                                                                                                                                                                                                                                                                                                                                                                                                       |       |
| Key results              | 18  | Summarise key results with reference to study objectives                                                                                                                                                                                                                                                                                                                                                              | 12    |
| Limitations              | 19  | Discuss limitations of the study, taking into account sources of potential bias or imprecision. Discuss both direction and magnitude of any potential bias                                                                                                                                                                                                                                                            | 14-15 |
| Interpretation           | 20  | Give a cautious overall interpretation of results considering objectives, limitations, multiplicity of analyses, results from similar studies, and other relevant evidence                                                                                                                                                                                                                                            | 12-14 |
| Generalisability         | 21  | Discuss the generalisability (external validity) of the study results                                                                                                                                                                                                                                                                                                                                                 | 14-16 |
| <b>Other information</b> |     |                                                                                                                                                                                                                                                                                                                                                                                                                       |       |
| Funding                  | 22  | Give the source of funding and the role of the funders for the present study and, if applicable, for the original study on which the present article is based                                                                                                                                                                                                                                                         | 16    |

\*Give information separately for exposed and unexposed groups.

**Note:** An Explanation and Elaboration article discusses each checklist item and gives methodological background and published examples of transparent reporting. The STROBE checklist is best used in conjunction with this article (freely available on the Web sites of PLoS Medicine at <http://www.plosmedicine.org/>, Annals of Internal Medicine at <http://www.annals.org/>, and Epidemiology at <http://www.epidem.com/>). Information on the STROBE Initiative is available at <http://www.strobe-statement.org>.
